# Supplementary material for: Impact of night and shift work on metabolic syndrome and its components: a cross-sectional study in an active middle-to-older-aged population-based sample
Source: PubMed Central journal article supplement (PMC8852754; doi:10.1136/bmjopen-2021-053591), 2022-02-15
Supplement: bmjopen-2021-053591.draft_revisions.pdf [file bmjopen-2021-053591.draft_revisions.pdf]

# BMJ Open

BMJ Open is committed to open peer review. As part of this commitment we make the peer review history of every article we publish publicly available.

When an article is published we post the peer reviewers' comments and the authors' responses online. We also post the versions of the paper that were used during peer review. These are the versions that the peer review comments apply to.

The versions of the paper that follow are the versions that were submitted during the peer review process. They are not the versions of record or the final published versions. They should not be cited or distributed as the published version of this manuscript.

BMJ Open is an open access journal and the full, final, typeset and author-corrected version of record of the manuscript is available on our site with no access controls, subscription charges or pay-per-view fees (<http://bmjopen.bmj.com>).

If you have any questions on BMJ Open's open peer review process please email [info.bmjopen@bmj.com](mailto:info.bmjopen@bmj.com)

# BMJ Open

## Impact of night and shift work on metabolic syndrome and its components in an active middle-aged population-based sample

|                               |                                                                                                                                                                                                                                                                                                                                                                                                                                                                                                                                                                                                                                                                                                                                                                                   |
|-------------------------------|-----------------------------------------------------------------------------------------------------------------------------------------------------------------------------------------------------------------------------------------------------------------------------------------------------------------------------------------------------------------------------------------------------------------------------------------------------------------------------------------------------------------------------------------------------------------------------------------------------------------------------------------------------------------------------------------------------------------------------------------------------------------------------------|
| Journal:                      | <i>BMJ Open</i>                                                                                                                                                                                                                                                                                                                                                                                                                                                                                                                                                                                                                                                                                                                                                                   |
| Manuscript ID                 | bmjopen-2021-053591                                                                                                                                                                                                                                                                                                                                                                                                                                                                                                                                                                                                                                                                                                                                                               |
| Article Type:                 | Original research                                                                                                                                                                                                                                                                                                                                                                                                                                                                                                                                                                                                                                                                                                                                                                 |
| Date Submitted by the Author: | 20-May-2021                                                                                                                                                                                                                                                                                                                                                                                                                                                                                                                                                                                                                                                                                                                                                                       |
| Complete List of Authors:     | Bayon, Virginie; CHUV) and University of Lausanne<br>Berger, Mathieu; CHUV, Center for Investigation and Research in Sleep<br>Solelhac, Geoffroy; CHUV) and University of Lausanne<br>Haba-Rubio, José; CHUV) and University of Lausanne<br>Marques-Vidal, Pedro; CHUV) and University of Lausanne, Department of<br>Medicine, Internal Medicine<br>Strippoli, Marie-Pierre; CHUV) and University of Lausanne, Department<br>of Psychiatry<br>Preisig, Martin; CHUV) and University of Lausanne, Department of<br>Psychiatry<br>Leger, Damien; Centre du sommeil et de la vigilance, Hôtel Dieu, APHP;<br>Université Paris Descartes, Sorbonne paris Cité, EA 7330 VIFASOM,<br>Sommeil-Vigilance-Fatigue et Santé Publique,<br>Heinzer, Raphael; CHUV) and University of Lausanne |
| Keywords:                     | General endocrinology < DIABETES & ENDOCRINOLOGY,<br>EPIDEMIOLOGY, Diabetes & endocrinology < INTERNAL MEDICINE                                                                                                                                                                                                                                                                                                                                                                                                                                                                                                                                                                                                                                                                   |
|                               |                                                                                                                                                                                                                                                                                                                                                                                                                                                                                                                                                                                                                                                                                                                                                                                   |

SCHOLARONE™  
Manuscripts

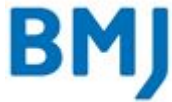

I, the Submitting Author has the right to grant and does grant on behalf of all authors of the Work (as defined in the below author licence), an exclusive licence and/or a non-exclusive licence for contributions from authors who are: i) UK Crown employees; ii) where BMJ has agreed a CC-BY licence shall apply, and/or iii) in accordance with the terms applicable for US Federal Government officers or employees acting as part of their official duties; on a worldwide, perpetual, irrevocable, royalty-free basis to BMJ Publishing Group Ltd ("BMJ") its licensees and where the relevant Journal is co-owned by BMJ to the co-owners of the Journal, to publish the Work in this journal and any other BMJ products and to exploit all rights, as set out in our [licence](#).

The Submitting Author accepts and understands that any supply made under these terms is made by BMJ to the Submitting Author unless you are acting as an employee on behalf of your employer or a postgraduate student of an affiliated institution which is paying any applicable article publishing charge ("APC") for Open Access articles. Where the Submitting Author wishes to make the Work available on an Open Access basis (and intends to pay the relevant APC), the terms of reuse of such Open Access shall be governed by a Creative Commons licence – details of these licences and which [Creative Commons](#) licence will apply to this Work are set out in our licence referred to above.

Other than as permitted in any relevant BMJ Author's Self Archiving Policies, I confirm this Work has not been accepted for publication elsewhere, is not being considered for publication elsewhere and does not duplicate material already published. I confirm all authors consent to publication of this Work and authorise the granting of this licence.

1  
2  
3 **Impact of night and shift work on metabolic syndrome and its components in**  
4 **an active middle-aged population-based sample**  
5  
6  
7  
8  
9

10 **Short title:** Impact of night and shift work  
11  
12

13  
14 Virginie Bayon, MD<sup>1,\*</sup> Mathieu Berger, PhD<sup>1,\*</sup> Geoffroy Solelhac, MD<sup>1</sup> José Haba-  
15 Rubio, MD<sup>1</sup> Pedro Marques-Vidal, MD<sup>2</sup> Marie-Pierre F. Strippoli, MSc<sup>3</sup> Martin  
16  
17 Preisig, MD<sup>3</sup> Damien Leger, MD<sup>4,5</sup> Raphael Heinzer, MD<sup>1</sup>  
18  
19  
20  
21  
22

23  
24 <sup>1</sup>Center for Investigation and Research in Sleep (CIRS), Lausanne University  
25 Hospital (CHUV) and University of Lausanne, Lausanne, Switzerland; <sup>2</sup>Department of  
26  
27 Medicine, Internal Medicine, Lausanne University Hospital (CHUV) and University of  
28  
29 Lausanne, Lausanne, Switzerland; <sup>3</sup>Department of Psychiatry, Lausanne University  
30  
31 Hospital (CHUV) and University of Lausanne, Lausanne, Switzerland; <sup>4</sup>Université de  
32  
33 Paris, VIFASOM (Equipe d'accueil 5330 Vigilance FATigue SOMmeil et Santé  
34  
35 Publique), Paris, France ; <sup>5</sup>APHP, Hôtel Dieu, Centre du Sommeil et de la Vigilance,  
36  
37  
38  
39  
40  
41  
42  
43  
44  
45  
46  
47  
48  
49  
50  
51  
52  
53  
54  
55  
56  
57  
58  
59  
60

\*these authors contributed equally to this work

**Corresponding Author:** Mathieu Berger, PhD, Center for Investigation and  
Research in Sleep (CIRS), Lausanne University Hospital (CHUV), Rue du Bugnon  
46, 1011 Lausanne, Switzerland. Tel: +41 21 314 86 45. E-mail:  
*mathieuberger@outlook.com*

1  
2  
3  
4  
5  
6  
7  
8  
9  
10  
11  
12  
13  
14  
15  
16  
17  
18  
19  
20  
21  
22  
23  
24  
25  
26  
27  
28  
29  
30  
31  
32  
33  
34  
35  
36  
37  
38  
39  
40  
41  
42  
43  
44  
45  
46  
47  
48  
49  
50  
51  
52  
53  
54  
55  
56  
57  
58  
59  
60

**Total word count** (main text only): 3357.

**Number of Tables/Figures:** 3/1

For peer review only

## ABSTRACT

**Objectives** To examine the effects of work schedules on metabolic syndrome and its components in active middle-aged workers.

**Methods** A cross-sectional analysis including active workers from the population-based CoLaus|PsyCoLaus study (Lausanne, Switzerland) was performed. Work schedule was self-reported and defined as follows: permanent day, day shift, night shift, and permanent night work. Associations between work schedule and the risk of metabolic syndrome and its components were analyzed using multivariable-adjusted logistic regressions.

**Results** A total of 2301 active workers (mean age  $56.2 \pm 6.9$  years, 50.1% women) were included. Of these, 1905 were permanent day workers, 220 were day shift workers, 134 were night shift workers and 42 were permanent night shift workers. There were significant interactions between sex and work schedule for metabolic syndrome, high triglycerides and visceral obesity. Men but not women permanent night workers had a higher prevalence of metabolic syndrome than permanent day workers in multivariable-adjusted analyses (OR 4.45 [95% CI 1.36-14.56]). Analysis of metabolic syndrome subcomponents showed that the association between work schedule and metabolic syndrome in men was mainly driven by visceral obesity (OR 3.35 [95% CI 1.04-10.76]). Conversely, women but not men working in night shift were at increased risk of having high triglycerides compared with permanent day workers (OR 2.92 [95% CI 1.03-8.27]).

**Conclusions** The risk of metabolic syndrome is higher in men working in permanent night shift compared with permanent day work and this association could be mediated by visceral obesity.

**Keywords** work schedule, abdominal obesity, risk factors

1  
2  
3  
4  
5  
6  
7  
8  
9  
10  
11  
12  
13  
14  
15  
16  
17  
18  
19  
20  
21  
22  
23  
24  
25  
26  
27  
28  
29  
30  
31  
32  
33  
34  
35  
36  
37  
38  
39  
40  
41  
42  
43  
44  
45  
46  
47  
48  
49  
50  
51  
52  
53  
54  
55  
56  
57  
58  
59  
60

For peer review only

## STRENGTHS AND LIMITATIONS OF THIS STUDY

- This study evaluated the effects of work schedules on metabolic syndrome and its subcomponent in a general population setting with a precise and extensive assessment of cardio-metabolic phenotypes.
- The association between different shift work schedules and metabolic syndrome was assessed after adjustment for multiple cofounders.
- Because the primary aim of the cohort was not to evaluate the impact of shift work, no precise characterization of workstations and work rhythms (hourly amplitude, direction of rotation, duration of rotations, and duration of exposition) was performed.
- A “healthy worker effect” with a selection of “night shift tolerant” workers cannot be ruled out given the older age of our sample.



## Introduction

Due to economic constraints, efficiency needs or performance objectives, night and shift work (3x8) has become highly prevalent in modern societies. Approximately 18% of all European workers work shifts, and this rate is as high as 35% in some countries<sup>1</sup>. Non-standard working schedules (e.g. shift work, night work) are no longer limited to health and safety workers, but are spread across all industries and services, from manufacturing, to transport, telecommunications and more.

Night and shift work interfere with the physiological circadian rhythm, desynchronizing the biological clock, which can favor systemic inflammation<sup>2</sup>. It has also been shown that night and shift work are associated with reduced and disturbed sleep<sup>3</sup>. Hence, both circadian disruption and short or poor sleep could be mediators explaining the relationship between night or shift work and chronic health conditions, including increased risk of cardiovascular and metabolic disorders<sup>4</sup>. Moreover, several laboratory-controlled studies showed that circadian rhythm desynchronization and sleep restriction have detrimental effects on neuroendocrine, inflammatory and immune functions<sup>5</sup>.

The health-related impact of atypical work schedules has thus been a topic of interest for some time<sup>6</sup>. Sleep disturbances, decreased vigilance and increased risk of accidents are among the recognized short-term negative effects of night and shift work<sup>7</sup>. Longer-term health effects have also been described, and include increased risk of cardiovascular and metabolic disorders<sup>8 9</sup>. However, the impact of shift work on metabolic syndrome is not yet completely understood.

Metabolic syndrome combines several interrelated metabolic risk factors associated with all-cause mortality<sup>10</sup>. Subjects with metabolic syndrome have a higher risk of cardiovascular disease mortality and morbidity<sup>11</sup>. Metabolic syndrome definition is

1  
2  
3 based on five components: high blood pressure (BP), hyperglycemia, high  
4 triglycerides, low high-density lipoprotein (HDL) cholesterol and visceral obesity. A  
5 higher prevalence of metabolic syndrome and its components among night and shift  
6 workers has previously been suggested in some studies<sup>12 13</sup>. However, the specific  
7 effect of shift work and permanent night work remains largely unknown. Moreover, a  
8 recent systematic review concluded that there was insufficient evidence regarding  
9 the association between shift work and metabolic syndrome when confounding  
10 variables are taken into account<sup>14</sup>.

11  
12 Thus, using data of active workers from a population-based study, the aim of the  
13 present paper was to assess the association between metabolic syndrome and its  
14 components according to four types of work schedules (permanent day, day shift,  
15 night shift and permanent night shift work).

## 32 **Methods**

33  
34 **Population** CoLaus|PsyCoLaus is a population-based cohort exploring the  
35 biological, genetic, and environmental determinants of cardiovascular risk factors,  
36 cardiovascular diseases, and mental disorders in the population of Lausanne,  
37 Switzerland. The methodological aspects (participant recruitment and follow-up) have  
38 been previously reported<sup>15</sup>. Briefly, a simple, non-stratified, random sample of 6,734  
39 subjects from the Lausanne population aged 35-75 years was recruited between  
40 2003 and 2006. The baseline and three follow-up evaluations included physical and  
41 psychiatric exams, blood sampling, and self-completed questionnaires. All data  
42 analyzed in the present paper were obtained from the second physical follow-up  
43 evaluation ( $n = 4881$ ), which took place between 2014 and 2017. The study was  
44  
45  
46  
47  
48  
49  
50  
51  
52  
53  
54  
55  
56  
57  
58  
59  
60

1  
2  
3 approved by the Institutional Ethics Committee of the University of Lausanne  
4  
5 (decision reference 33/09) and written informed consent was obtained from all subjects.  
6  
7  
8  
9

### 10 **Patient and Public Involvement**

11  
12 No patients or public were involved in this study design, conduct or analysis.  
13  
14

15 **Exposure and eligibility criteria** Professional activity and working hours were self-  
16 reported using the following questions: "Are you currently engaged in a professional  
17 activity?"; "What is your usual work schedule?" (day exclusively, rotation with no night  
18 work, rotation with night work, night work only). The number of work hours per week  
19 was also recorded. Participants not currently engaged in a professional activity were  
20 excluded from the present analysis. No other exclusion criteria were applied.  
21  
22  
23  
24  
25  
26  
27  
28  
29  
30  
31

32 **Outcome assessment** Metabolic syndrome was defined according to the Joint  
33 Interim Statement <sup>16</sup> as the presence of at least three of the following five conditions:  
34 high BP (systolic BP  $\geq 130$  mm Hg or diastolic BP  $\geq 85$  mm Hg or use of  
35 antihypertensive medication); visceral obesity (waist circumference  $\geq 88$  cm in women  
36 or  $\geq 102$  cm in men); high triglycerides ( $\geq 1.7$  mmol/L, or use of fibrates or nicotinic  
37 acid); low HDL-cholesterol levels ( $< 1.30$  mmol/L in women or  $< 1.03$  mmol/L in men,  
38 or use of fibrates or nicotinic acid); and high fasting plasma glucose ( $\geq 5.6$  mmol/L or  
39 use of anti-diabetic medication). Blood pressure was measured three times on the  
40 left arm after at least a 10-min rest in the seated position. The mean of the last two  
41 measures was used. Venous blood samples were drawn after an overnight fast to  
42 measure the levels of glucose, HDL cholesterol, low HDL-cholesterol, and  
43 triglycerides. Waist circumference was measured twice with a non-stretchable tape  
44 over the unclothed abdomen at the mid-point between the lowest rib and the iliac  
45  
46  
47  
48  
49  
50  
51  
52  
53  
54  
55  
56  
57  
58  
59  
60

1  
2  
3 crest. Hip circumference was also measured twice at the greater trochanters. For  
4  
5 waist and hip, the mean of the two measurements was used and the waist-to-hip  
6  
7 ratio (WHR) was calculated.  
8  
9

10  
11  
12 **Covariates** The current socio-professional category was self-reported by  
13  
14 participants. Sociodemographic (age, sex) and lifestyle (smoking habit, alcohol  
15  
16 intake, coffee consumption) data were collected by self-administered questionnaires.  
17  
18 Educational level was categorized as *low* (primary), *middle* (apprenticeship or  
19  
20 secondary school) or *high* (university). Smoking status was categorized as *never*,  
21  
22 *former* or *current*. Body weight and height were measured with participants standing  
23  
24 without shoes in light indoor clothing. Body weight was measured in kilograms to the  
25  
26 nearest 0.1 kg using a Seca™ scale (Seca, Hamburg, Germany). Height was  
27  
28 measured to the nearest 5 mm using a Seca™ height gauge (Seca, Hamburg,  
29  
30 Germany). Body mass index (BMI) was defined as weight (kg)/height<sup>2</sup> (m<sup>2</sup>). Obesity  
31  
32 was defined as BMI ≥ 30 kg/m<sup>2</sup>.  
33  
34  
35  
36

37  
38 Medication use was coded according to the World Health Organization  
39  
40 Anatomical Therapeutic Chemical (ATC) Classification System  
41  
42 (<http://www.whocc.no/atcddd>). Drugs influencing sleep included hypnotics or  
43  
44 sedatives (N05C), anxiolytics (N05B) and antipsychotics (N05A). Diabetes was  
45  
46 defined as fasting plasma glucose levels ≥7.0 mmol/L or use of antidiabetic  
47  
48 medication<sup>17</sup>. Hypertension was defined as systolic BP ≥140 mm Hg and/or diastolic  
49  
50 BP ≥90 mm Hg, and/or current use of antihypertensive medication.  
51  
52

53  
54 Fasting blood sample was collected for various analyses including glucose,  
55  
56 total cholesterol, HDL-cholesterol, triglycerides and insulin. The HOMA-IR was  
57  
58 calculated as fasting insulin in mIU/L x fasting glucose in mg/dL/405.  
59  
60

1  
2  
3 The presence of a current major depressive disorder was retrospectively  
4 assigned according to Diagnostic and Statistical Manual of Mental Disorders, Fourth  
5 Edition (DSM-IV) criteria with information collected at the second and third psychiatric  
6 follow-up evaluation using the French translation of the semi-structured Diagnostic  
7 Interview for Genetic Studies (DIGS). Cardiovascular disease was defined as  
8 previous stroke, heart attack, coronary artery bypass grafting or percutaneous  
9 coronary intervention.  
10  
11  
12  
13  
14  
15  
16  
17  
18

19 Subjective sleep characteristics were determined using the Pittsburgh Sleep  
20 Quality Index (PSQI)<sup>18</sup>, the Epworth Sleepiness Scale (ESS)<sup>19</sup>, and the Berlin  
21 questionnaire for sleep-disordered breathing (SDB)<sup>20</sup>. Sleep quality was assessed  
22 with the PSQI and dichotomized into good/poor sleep quality (score  $\leq 5$ / $> 5$ ), and  
23 excessive daytime sleepiness (EDS) was defined as an ESS score  $> 10$ ). A Berlin  
24 score  $\geq 2$  was defined as indicating a high risk of SDB.  
25  
26  
27  
28  
29  
30  
31  
32

33 Dietary intake was evaluated using a validated Food Frequency Questionnaire  
34 (FFQ) querying the consumption of 97 different food items including portion size over  
35 the previous 4 weeks. The daily total energy intake was obtained as well as the  
36 proportion of macronutrients, alcohol and fibers.  
37  
38  
39  
40  
41

42 Physical activity was evaluated with the physical activity frequency  
43 questionnaire (PAFQ)<sup>21</sup>. The questionnaire lists 70 types of physical activity from  
44 various domains (e.g. occupational, housework, leisure time, sports, etc.) and  
45 participants indicated the number of days in the past week (0–7) and the duration per  
46 day (0–10 h, in 15-minute increments) for each activity. Energy expenditure  
47 corresponds to the sum of all the energy expenditure over one week divided by 7 to  
48 obtain a mean energy expenditure over a 24-hour period. Sedentary status was  
49 defined as spending more than 90% of daily energy in activities below moderate and  
50  
51  
52  
53  
54  
55  
56  
57  
58  
59  
60

1  
2  
3 high intensity (defined as requiring at least 4 times the basal metabolic rate [BMR]).  
4  
5 The percentage of total energy >4 metabolic equivalents (METs) was also calculated  
6  
7 to quantify moderate and high intensity physical activity.  
8  
9  
10

11  
12 **Statistical analysis** Data distribution was graphically assessed using a normal Q-Q  
13  
14 plot. Data were presented as number of participants (%) for categorical variables,  
15  
16 mean  $\pm$  SD for normal distribution, or median and interquartile range for non-normally  
17  
18 distributed continuous variables. Univariate analyses of continuous data were  
19  
20 performed using one-way ANOVA or Kruskal Wallis test follow by Bonferroni's post-  
21  
22 hoc or Tamhane's T2 as appropriate. Categorical variables were analyzed using Chi-  
23  
24 square test or Fisher's exact test as appropriate. The associations between working  
25  
26 schedules (permanent day, day shift work, night shift work and permanent night  
27  
28 work) and metabolic syndrome (and its subcomponents) were determined using  
29  
30 logistic regression analysis. Prior to this, the interaction of sex with the metabolic  
31  
32 syndrome and each of its subcomponents was tested. In case of significant  
33  
34 interaction, results were presented for both men and women, otherwise results were  
35  
36 shown for the whole sample. Each cardiometabolic risk factor was first tested in  
37  
38 univariate analysis (crude) then in two models with serial adjustment for potential  
39  
40 confounders. Model 1 was adjusted for age (continuous), educational level (low,  
41  
42 middle, high) and sex (except in case of significant sex\*outcome interaction). Model  
43  
44 2: Model 1 plus weekly alcohol consumption (continuous), smoking status (never,  
45  
46 former, current) and BMI (normal weight, overweight, obese; except for visceral  
47  
48 obesity). Model 3: Model 2 plus daily total energy expenditure (continuous). Box-  
49  
50 Tidwell tests were used to check the assumption of linearity for the logit of each  
51  
52 covariate. If the assumption was violated, the square of the covariate was used or the  
53  
54  
55  
56  
57  
58  
59  
60

1  
2  
3 covariate was transformed into categorical variable. To assess collinearity between  
4  
5 covariates, a linear regression analysis including all covariates was performed, and  
6  
7 the variance inflation factor (VIF) was calculated. A VIF  $\leq 5$  was considered as  
8  
9 absence of multi-collinearity. Results from logistic regression are presented as OR  
10  
11 values with 95% CI. Permanent day workers were considered as the reference  
12  
13  
14 group.

15  
16  
17 All statistical analyses were performed using IBM SPSS Statistics version 26.0  
18  
19 for Macintosh (IBM Corp). Significant results were considered for a two-sided test  
20  
21 with  $p < 0.05$ .

## 22 23 24 25 26 **Results**

27  
28  
29 **Population characteristics** A total of 2301 participants were engaged in a  
30  
31 professional activity at the second follow-up of the CoLaus|PsyCoLaus study. Among  
32  
33 them, 1905 worked exclusively during the daytime (permanent day workers), 220  
34  
35 were rotation workers with no night work (day shift workers), 134 were rotation  
36  
37 workers with night work (night shift workers) and 42 worked exclusively during the  
38  
39 night (permanent night workers) (Supplementary Figure 1).

40  
41  
42 Table 1 shows the baseline characteristics of the sample according to the four  
43  
44 different work schedules. The mean age of the participants was  $56.2 \pm 6.9$  years and  
45  
46 half of the sample (50.1%) were women. The proportions of men/women differed  
47  
48 significantly according to work schedule: women were more likely to work in day shift  
49  
50 and permanent night shift roles, while men were more likely to do night shift work.  
51  
52 Mean BMI and waist circumference were significantly higher in night shift workers  
53  
54 and permanent night workers compared with permanent day workers and day shift  
55  
56 workers ( $p < 0.001$ ). Permanent night shift workers were more likely to smoke than  
57  
58  
59  
60

1  
2  
3 other groups, whereas night shift workers were less sedentary than their  
4  
5 counterparts. Lipid levels and blood glucose analysis, and sleep parameters in the  
6  
7 different work schedule groups are also shown in Table 1.  
8  
9

### 10 11 12 **Prevalence of metabolic syndrome and its components according to work**

13  
14 **schedules** There were significant interactions between sex and work schedule for  
15  
16 metabolic syndrome ( $p=0.009$ ), high triglycerides ( $p=0.043$ ) and visceral obesity  
17  
18 ( $p=0.047$ ), but not for high BP, high glucose and low HDL-cholesterol.  
19  
20

21  
22 The prevalence of the metabolic syndrome was almost three times higher in  
23  
24 men permanent night workers compared with men permanent day workers; a similar  
25  
26 trend was found for the prevalence of visceral obesity and low HDL-cholesterol  
27  
28 (Table 2). The prevalence of high glucose level in night shift workers and permanent  
29  
30 night workers was nearly double that in permanent day workers (Table 2).  
31  
32

### 33 34 35 **Association between metabolic syndrome and work schedules by patient sex**

36  
37 Compared to men permanent day workers, permanent night workers showed a  
38  
39 higher risk of metabolic syndrome in univariate analysis (OR 6.48 [95% CI 2.40-  
40  
41 17.46]; Supplementary Table 1). This significant association persisted after  
42  
43 adjustment for age, educational level, alcohol consumption, smoking status and daily  
44  
45 total energy expenditure (OR 4.45 [95% CI 1.36-14.56]) (Figure 1). Conversely, the  
46  
47 risk of metabolic syndrome in day shift-workers was lower than that in permanent day  
48  
49 workers in crude analysis (OR 0.36 [95% CI 0.18-0.74]), and after adjustment in  
50  
51 models 1 and 2 and 3 (Supplementary Table 1). No significant association between  
52  
53 work schedule and metabolic syndrome was found for women.  
54  
55  
56  
57  
58  
59  
60



### **Association of each component of metabolic syndrome with work schedule**

In men, the risk of visceral obesity in permanent night workers was significantly higher than that in permanent day workers, including after adjustment for covariates (Table 3). Moreover, the risk of elevated triglyceride levels in permanent night workers was increased in the crude analysis and after adjustment for age, educational level, alcohol consumption, smoking status and BMI (model 2), but was no longer significant in the fully adjusted model 3 (Table 3).

In women, night shift-workers showed a higher risk of elevated triglyceride levels, which persisted after multiple adjustments (Table 3).

### **Discussion**

In our middle-aged active general population sample, we found differential associations between permanent night work and the risk of metabolic syndrome for men and women. Indeed, permanent night work was only associated with a higher risk of metabolic syndrome in men but not in women. This association could be mediated by a higher risk of visceral obesity in men. The increased risk of metabolic syndrome is in line with previous studies<sup>22</sup>. Some studies even showed that the risk for the development of metabolic syndrome and each of its components gradually and independently increases with accumulated years of shift work<sup>23</sup>. Contrary to other studies, we found no association between permanent night work or night shift-work and metabolic syndrome in women<sup>24 25</sup>. In contrast to the findings on the metabolic syndrome as a whole, for the triglycerides component we found an increased risk of elevated concentrations among shift workers in women but not in men. This supports previous evidence from Karlsson *et al.* who also reported an elevated triglyceride level among shift workers in 60-year-old women<sup>26</sup>.

1  
2  
3 While the mechanisms underlying the observed increased risk of metabolic  
4 syndrome in shift or night workers have not been fully elucidated, several explanatory  
5 hypotheses can be proposed. Firstly, sleep duration has been suggested to play a  
6 key role in the development of metabolic syndrome. A previous meta-analysis found  
7 that short sleep duration was significantly associated with a 27% increase in risk of  
8 metabolic syndrome whereas long sleep duration was not<sup>27</sup>. Similar results were  
9 found in both men and women. In our study, self-reported sleep duration did not differ  
10 between the different groups of workers and therefore does not explain the increased  
11 risk of metabolic syndrome observed in permanent night workers among men.  
12 However, we cannot rule out that our findings might have been different if objective  
13 sleep duration measures were used because objective and subjective sleep duration  
14 can differ significantly. Unfortunately, objective sleep assessment could not be  
15 included in our analysis. Moreover, sleep fragmentation or an alteration of sleep  
16 structure due to irregular sleep schedule or circadian rhythm misalignment in night  
17 workers cannot be excluded and could be a possible explanation for the increased  
18 risk of metabolic syndrome<sup>28 29</sup>.

19  
20  
21 Secondly, dietary habits could contribute to development of the metabolic  
22 syndrome in night or shift workers, but available studies on this subject are scarce. A  
23 cross-sectional study comparing 98 rotating shift workers to 100 regular day workers  
24 demonstrated that total energy intake and contributions of macronutrients did not  
25 differ between the two groups, except for saturated lipids (+10% in shift workers)<sup>30</sup>.  
26 However, meal distribution was different in the two groups. Similar to other studies<sup>31</sup>  
27  
28  
29  
30  
31  
32  
33  
34  
35  
36  
37  
38  
39  
40  
41  
42  
43  
44  
45  
46  
47  
48  
49  
50  
51  
52  
53  
54  
55  
56  
57  
58  
59  
60  
61  
62  
63  
64  
65  
66  
67  
68  
69  
70  
71  
72  
73  
74  
75  
76  
77  
78  
79  
80  
81  
82  
83  
84  
85  
86  
87  
88  
89  
90  
91  
92  
93  
94  
95  
96  
97  
98  
99  
100  
101  
102  
103  
104  
105  
106  
107  
108  
109  
110  
111  
112  
113  
114  
115  
116  
117  
118  
119  
120  
121  
122  
123  
124  
125  
126  
127  
128  
129  
130  
131  
132  
133  
134  
135  
136  
137  
138  
139  
140  
141  
142  
143  
144  
145  
146  
147  
148  
149  
150  
151  
152  
153  
154  
155  
156  
157  
158  
159  
160  
161  
162  
163  
164  
165  
166  
167  
168  
169  
170  
171  
172  
173  
174  
175  
176  
177  
178  
179  
180  
181  
182  
183  
184  
185  
186  
187  
188  
189  
190  
191  
192  
193  
194  
195  
196  
197  
198  
199  
200  
201  
202  
203  
204  
205  
206  
207  
208  
209  
210  
211  
212  
213  
214  
215  
216  
217  
218  
219  
220  
221  
222  
223  
224  
225  
226  
227  
228  
229  
230  
231  
232  
233  
234  
235  
236  
237  
238  
239  
240  
241  
242  
243  
244  
245  
246  
247  
248  
249  
250  
251  
252  
253  
254  
255  
256  
257  
258  
259  
260  
261  
262  
263  
264  
265  
266  
267  
268  
269  
270  
271  
272  
273  
274  
275  
276  
277  
278  
279  
280  
281  
282  
283  
284  
285  
286  
287  
288  
289  
290  
291  
292  
293  
294  
295  
296  
297  
298  
299  
300  
301  
302  
303  
304  
305  
306  
307  
308  
309  
310  
311  
312  
313  
314  
315  
316  
317  
318  
319  
320  
321  
322  
323  
324  
325  
326  
327  
328  
329  
330  
331  
332  
333  
334  
335  
336  
337  
338  
339  
340  
341  
342  
343  
344  
345  
346  
347  
348  
349  
350  
351  
352  
353  
354  
355  
356  
357  
358  
359  
360  
361  
362  
363  
364  
365  
366  
367  
368  
369  
370  
371  
372  
373  
374  
375  
376  
377  
378  
379  
380  
381  
382  
383  
384  
385  
386  
387  
388  
389  
390  
391  
392  
393  
394  
395  
396  
397  
398  
399  
400  
401  
402  
403  
404  
405  
406  
407  
408  
409  
410  
411  
412  
413  
414  
415  
416  
417  
418  
419  
420  
421  
422  
423  
424  
425  
426  
427  
428  
429  
430  
431  
432  
433  
434  
435  
436  
437  
438  
439  
440  
441  
442  
443  
444  
445  
446  
447  
448  
449  
450  
451  
452  
453  
454  
455  
456  
457  
458  
459  
460  
461  
462  
463  
464  
465  
466  
467  
468  
469  
470  
471  
472  
473  
474  
475  
476  
477  
478  
479  
480  
481  
482  
483  
484  
485  
486  
487  
488  
489  
490  
491  
492  
493  
494  
495  
496  
497  
498  
499  
500  
501  
502  
503  
504  
505  
506  
507  
508  
509  
510  
511  
512  
513  
514  
515  
516  
517  
518  
519  
520  
521  
522  
523  
524  
525  
526  
527  
528  
529  
530  
531  
532  
533  
534  
535  
536  
537  
538  
539  
540  
541  
542  
543  
544  
545  
546  
547  
548  
549  
550  
551  
552  
553  
554  
555  
556  
557  
558  
559  
560  
561  
562  
563  
564  
565  
566  
567  
568  
569  
570  
571  
572  
573  
574  
575  
576  
577  
578  
579  
580  
581  
582  
583  
584  
585  
586  
587  
588  
589  
590  
591  
592  
593  
594  
595  
596  
597  
598  
599  
600  
601  
602  
603  
604  
605  
606  
607  
608  
609  
610  
611  
612  
613  
614  
615  
616  
617  
618  
619  
620  
621  
622  
623  
624  
625  
626  
627  
628  
629  
630  
631  
632  
633  
634  
635  
636  
637  
638  
639  
640  
641  
642  
643  
644  
645  
646  
647  
648  
649  
650  
651  
652  
653  
654  
655  
656  
657  
658  
659  
660  
661  
662  
663  
664  
665  
666  
667  
668  
669  
670  
671  
672  
673  
674  
675  
676  
677  
678  
679  
680  
681  
682  
683  
684  
685  
686  
687  
688  
689  
690  
691  
692  
693  
694  
695  
696  
697  
698  
699  
700  
701  
702  
703  
704  
705  
706  
707  
708  
709  
710  
711  
712  
713  
714  
715  
716  
717  
718  
719  
720  
721  
722  
723  
724  
725  
726  
727  
728  
729  
730  
731  
732  
733  
734  
735  
736  
737  
738  
739  
740  
741  
742  
743  
744  
745  
746  
747  
748  
749  
750  
751  
752  
753  
754  
755  
756  
757  
758  
759  
760  
761  
762  
763  
764  
765  
766  
767  
768  
769  
770  
771  
772  
773  
774  
775  
776  
777  
778  
779  
780  
781  
782  
783  
784  
785  
786  
787  
788  
789  
790  
791  
792  
793  
794  
795  
796  
797  
798  
799  
800  
801  
802  
803  
804  
805  
806  
807  
808  
809  
810  
811  
812  
813  
814  
815  
816  
817  
818  
819  
820  
821  
822  
823  
824  
825  
826  
827  
828  
829  
830  
831  
832  
833  
834  
835  
836  
837  
838  
839  
840  
841  
842  
843  
844  
845  
846  
847  
848  
849  
850  
851  
852  
853  
854  
855  
856  
857  
858  
859  
860  
861  
862  
863  
864  
865  
866  
867  
868  
869  
870  
871  
872  
873  
874  
875  
876  
877  
878  
879  
880  
881  
882  
883  
884  
885  
886  
887  
888  
889  
890  
891  
892  
893  
894  
895  
896  
897  
898  
899  
900  
901  
902  
903  
904  
905  
906  
907  
908  
909  
910  
911  
912  
913  
914  
915  
916  
917  
918  
919  
920  
921  
922  
923  
924  
925  
926  
927  
928  
929  
930  
931  
932  
933  
934  
935  
936  
937  
938  
939  
940  
941  
942  
943  
944  
945  
946  
947  
948  
949  
950  
951  
952  
953  
954  
955  
956  
957  
958  
959  
960  
961  
962  
963  
964  
965  
966  
967  
968  
969  
970  
971  
972  
973  
974  
975  
976  
977  
978  
979  
980  
981  
982  
983  
984  
985  
986  
987  
988  
989  
990  
991  
992  
993  
994  
995  
996  
997  
998  
999  
1000

1  
2  
3 cannot rule out the possibility that night shift workers may have had a different  
4 circadian distribution of food intake rather than an increase in total daily intake<sup>33</sup>.  
5  
6

7  
8 Thirdly, circadian rhythm desynchronization could be a major contributor to the  
9 increased risk of metabolic syndrome among night and shift workers. Still, the  
10 underlying pathophysiological mechanisms of this association remain poorly  
11 understood. Some animal studies suggested that reduced melatonin production, due  
12 to circadian rhythm disruption, could be associated with a higher rate of metabolic  
13 syndrome<sup>34</sup>. Furthermore, Fonken *et al.* hypothesized that exposure to light at night  
14 altered circadian organization and affected metabolic parameters in mice<sup>35</sup>. Their  
15 results emphasized that even weak night lighting (5 lux) is sufficient to desynchronize  
16 food consumption and physical activity rhythms, which could explain the observed  
17 metabolic disorders<sup>34</sup>. In humans, Corbalan-Tutau *et al.* reported a reduced daily  
18 amplitude in melatonin and cortisol circadian patterns associated with metabolic  
19 disturbances in women<sup>36</sup>. Unfortunately, we did not measure melatonin and cortisol  
20 to confirm these findings in our sample.  
21  
22  
23  
24  
25  
26  
27  
28  
29  
30  
31  
32  
33  
34  
35  
36

37  
38 With regard to physical activity, we surprisingly found that night shift workers  
39 were more active than day shift workers and permanent day workers. This may be  
40 due to greater opportunities to perform a physical activity compared with other diurnal  
41 workers or to more physically active work among night shift workers, although this  
42 should be interpreted with caution due to limited agreement between estimates of  
43 activity obtained by PAFQ and those obtained from accelerometers<sup>37</sup>.  
44  
45  
46  
47  
48  
49  
50

51  
52 Finally, the higher risk of metabolic syndrome we observed in night shift  
53 workers may be explained by a vitamin D deficiency<sup>38</sup>. It has been shown that high  
54 levels of vitamin D among middle-aged and elderly populations are associated with a  
55 substantial decrease in cardiovascular disease, type 2 diabetes and metabolic  
56  
57  
58  
59  
60

1  
2  
3 syndrome<sup>39</sup>. Although we did not measure the vitamin D levels in our different groups  
4  
5 of workers, we can hypothesize that permanent night workers have lower exposure  
6  
7 to sunlight and may therefore be at higher risk of vitamin D deficiency.  
8  
9

10 In our study, among the components of the metabolic syndrome, an elevated  
11  
12 risk of visceral obesity was found in men permanent night workers. This finding is  
13  
14 consistent with a recent meta-analysis which found that shift workers had a higher  
15  
16 frequency of abdominal obesity than other obesity types and permanent night  
17  
18 workers demonstrated a 29% higher risk of central obesity than rotating shift  
19  
20 workers<sup>40</sup>.  
21  
22

23  
24 The main strength of the present study is its large population-based sample  
25  
26 with a precise and extensive assessment of cardio-metabolic phenotypes. Indeed,  
27  
28 previous studies were mainly performed in specific populations of workers or in  
29  
30 particular sectors of activity, such as public health and emergency, which limit the  
31  
32 generalizability to other types of shift or night work. In addition, most studies have  
33  
34 assessed the risk of metabolic syndrome in shift workers compared with day workers,  
35  
36 but few studies have differentiated between shift workers, permanent night workers  
37  
38 and shift workers with and without night work.  
39  
40

41  
42 There are also some limitations that need to be mentioned. First, because the  
43  
44 primary aim of the CoLaus|PsyCoLaus study was not to evaluate the impact of shift  
45  
46 work, no precise characterization of workstations and work rhythms (hourly  
47  
48 amplitude, direction of rotation, duration of rotations, and duration of exposition) was  
49  
50 performed. Second, a “healthy worker effect” with a selection of “night shift tolerant”  
51  
52 workers cannot be ruled out given the older age of our sample. Third, there were  
53  
54 some missing data on self-reported sleep habits and diet parameters and, despite  
55  
56 the use of validated questionnaires, declaration bias remains possible. Similarly, only  
57  
58  
59  
60

1  
2  
3 self-reported physical activity was assessed in this study and it would have been  
4  
5 interesting to have objective measures of physical activity and sleep to more  
6  
7 accurately investigate their influence.  
8  
9

## 10 11 12 **CONCLUSION** 13

14 our study demonstrates that only men permanent night workers appear to be at  
15  
16 increased risk of metabolic syndrome compared with permanent day workers, and  
17  
18 this association persisted after adjustment for sociodemographic confounders and  
19  
20 daily total energy expenditure. From a clinical point of view, we advise monitor of not  
21  
22 only BMI but also visceral obesity, particularly in men permanent night workers.  
23  
24 Further studies are needed to elucidate the underline mechanisms.  
25  
26  
27  
28  
29  
30  
31  
32  
33  
34  
35  
36  
37  
38  
39  
40  
41  
42  
43  
44  
45  
46  
47  
48  
49  
50  
51  
52  
53  
54  
55  
56  
57  
58  
59  
60

## ARTICLE INFORMATION

### Acknowledgments

The authors thank Prof. Mehdi Tafti, Prof. Vincent Mooser, Daniela Andries and Nadia Tobback for their important contribution to the HypnoLaus and CoLaus|PsyCoLaus Cohorts, the Lausanne population who volunteered to participate in the CoLaus|PsyCoLaus and HypnoLaus studies, as well as the whole team of CoLaus|PsyCoLaus.

### Funding

The HypnoLaus and the CoLaus/ PsyCoLaus studies were and are supported by research grants from GlaxoSmithKline ('not applicable'), the Faculty of Biology and Medicine of Lausanne ('not applicable'), the Swiss National Science Foundation (grants 3200B0-105993, 3200B0-118308, 33CSCO-122661, 33CS30-139468 and 33CS30- 148401), Leenaards Foundation ('not applicable'), and Vaud Pulmonary League ('not applicable'). The contents of this research are solely the responsibility of the authors.

### Author Disclosures

The authors have no conflicts of interest to declare.

### Contributors

VB, MB and RH designed the study. MB performed the statistical analysis. VB, MB and RH wrote the first draft of the manuscript. All authors interpreted the data, critically reviewed the manuscript and approved the final version. VB is the guarantor

1  
2  
3 of this work and, as such, had full access to all the data in the study and takes  
4  
5 responsibility for the integrity of the data and the accuracy of the data analysis.  
6

### 7 **Data availability statement**

8  
9  
10 Data may be obtained from a third party and are not publicly available. All data  
11  
12 relevant to the study are included in the article or uploaded as supplementary  
13  
14 information.  
15  
16

### 17 **References**

- 18  
19  
20  
21 1 Nappo N. Is there an association between working conditions and health? An  
22  
23 analysis of the Sixth European Working Conditions Survey data. *PLoS One*  
24  
25 2019;14:e0211294.  
26  
27  
28 2 Puttonen S, Viitasalo K, Harma M. Effect of shiftwork on systemic markers of  
29  
30 inflammation. *Chronobiol Int* 2011;28:528-35.  
31  
32  
33 3 Sallinen M, Kecklund G. Shift work, sleep, and sleepiness - differences between  
34  
35 shift schedules and systems. *Scand J Work Environ Health* 2010;36:121-33.  
36  
37  
38 4 Knutson KL, Spiegel K, Penev P, Van Cauter E. The metabolic consequences of  
39  
40 sleep deprivation. *Sleep Med Rev* 2007;11:163-78.  
41  
42  
43 5 Faraut B, Bayon V, Leger D. Neuroendocrine, immune and oxidative stress in shift  
44  
45 workers. *Sleep Med Rev* 2013;17:433-44.  
46  
47  
48 6 Kecklund G, Axelsson J. Health consequences of shift work and insufficient sleep.  
49  
50 *BMJ* 2016;355:i5210.  
51  
52  
53 7 Drake CL, Roehrs T, Richardson G, Walsh JK, Roth T. Shift work sleep disorder:  
54  
55 prevalence and consequences beyond that of symptomatic day workers. *Sleep*  
56  
57 2004;27:1453-62.  
58  
59  
60

- 1  
2  
3 8 Morikawa Y, Nakagawa H, Miura K et al. Effect of shift work on body mass index  
4 and metabolic parameters. *Scand J Work Environ Health* 2007;33:45-50.  
5  
6
- 7  
8 9 Wang D, Ruan W, Chen Z, Peng Y, Li W. Shift work and risk of cardiovascular  
9 disease morbidity and mortality: A dose-response meta-analysis of cohort studies.  
10  
11  
12 *Eur J Prev Cardiol* 2018;25:1293-1302.  
13
- 14  
15 10 Wu SH, Liu Z, Ho SC. Metabolic syndrome and all-cause mortality: a meta-analysis  
16 of prospective cohort studies. *Eur J Epidemiol* 2010;25:375-84.  
17
- 18  
19 11 Galassi A, Reynolds K, He J. Metabolic syndrome and risk of cardiovascular  
20 disease: a meta-analysis. *Am J Med* 2006;119:812-9.  
21  
22
- 23  
24 12 Karlsson B, Knutsson A, Lindahl B. Is there an association between shift work and  
25 having a metabolic syndrome? Results from a population based study of 27,485  
26 people. *Occup Environ Med* 2001;58:747-52.  
27  
28
- 29  
30 13 Violanti JM, Burchfiel CM, Hartley TA et al. Atypical work hours and metabolic  
31 syndrome among police officers. *Arch Environ Occup Health* 2009;64:194-201.  
32  
33
- 34  
35 14 Canuto R, Garcez AS, Olinto MT. Metabolic syndrome and shift work: a systematic  
36 review. *Sleep Med Rev* 2013;17:425-31.  
37  
38
- 39  
40 15 Firmann M, Mayor V, Vidal PM et al. The CoLaus study: a population-based study  
41 to investigate the epidemiology and genetic determinants of cardiovascular risk  
42 factors and metabolic syndrome. *BMC Cardiovasc Disord* 2008;8:6.  
43  
44
- 45  
46 16 Alberti KG, Eckel RH, Grundy SM et al. Harmonizing the metabolic syndrome: a  
47 joint interim statement of the International Diabetes Federation Task Force on  
48 Epidemiology and Prevention; National Heart, Lung, and Blood Institute; American  
49 Heart Association; World Heart Federation; International Atherosclerosis Society;  
50 and International Association for the Study of Obesity. *Circulation* 2009;120:1640-  
51  
52  
53  
54  
55  
56  
57  
58 5.  
59  
60



- 1  
2  
3 17 American Diabetes A. Diagnosis and classification of diabetes mellitus. *Diabetes*  
4 *Care* 2014;37 Suppl 1:S81-90.  
5  
6  
7 18 Buysse DJ, Reynolds CF, 3rd, Monk TH, Berman SR, Kupfer DJ. The Pittsburgh  
8 Sleep Quality Index: a new instrument for psychiatric practice and research.  
9 *Psychiatry Res* 1989;28:193-213.  
10  
11  
12 19 Johns MW. A new method for measuring daytime sleepiness: the Epworth  
13 sleepiness scale. *Sleep* 1991;14:540-5.  
14  
15  
16 20 Netzer NC, Stoohs RA, Netzer CM, Clark K, Strohl KP. Using the Berlin  
17 Questionnaire to identify patients at risk for the sleep apnea syndrome. *Ann Intern*  
18 *Med* 1999;131:485-91.  
19  
20  
21 21 Bernstein M, Sloutskis D, Kumanyika S, Sparti A, Schutz Y, Morabia A. Data-based  
22 approach for developing a physical activity frequency questionnaire. *Am J*  
23 *Epidemiol* 1998;147:147-54.  
24  
25  
26 22 Wang F, Zhang L, Zhang Y et al. Meta-analysis on night shift work and risk of  
27 metabolic syndrome. *Obes Rev* 2014;15:709-20.  
28  
29  
30 23 De Bacquer D, Van Risseghem M, Clays E, Kittel F, De Backer G, Braeckman L.  
31 Rotating shift work and the metabolic syndrome: a prospective study. *Int J*  
32 *Epidemiol* 2009;38:848-54.  
33  
34  
35 24 Lim YC, Hoe VCW, Darius A, Bhoo-Pathy N. Association between night-shift work,  
36 sleep quality and metabolic syndrome. *Occup Environ Med* 2018;75:716-723.  
37  
38  
39 25 Guo Y, Rong Y, Huang X et al. Shift work and the relationship with metabolic  
40 syndrome in Chinese aged workers. *PLoS One* 2015;10:e0120632.  
41  
42  
43 26 Karlsson B, Knutsson A, Lindahl B. Is there an association between shift work and  
44 having a metabolic syndrome? Results from a population based study of 27,485  
45 people. *Occupational and Environmental Medicine* 2001;58:747-752.  
46  
47  
48  
49  
50  
51  
52  
53  
54  
55  
56  
57  
58  
59  
60

- 1  
2  
3 27 Xi B, He D, Zhang M, Xue J, Zhou D. Short sleep duration predicts risk of metabolic  
4 syndrome: a systematic review and meta-analysis. *Sleep Med Rev* 2014;18:293-  
5  
6 7.  
7  
8  
9  
10 28 Stamatakis KA, Punjabi NM. Effects of sleep fragmentation on glucose metabolism  
11 in normal subjects. *Chest* 2010;137:95-101.  
12  
13  
14 29 Tasali E, Leproult R, Ehrmann DA, Van Cauter E. Slow-wave sleep and the risk of  
15 type 2 diabetes in humans. *Proc Natl Acad Sci U S A* 2008;105:1044-9.  
16  
17  
18 30 Esquirol Y, Bongard V, Mabile L, Jonnier B, Soulat JM, Perret B. Shift work and  
19 metabolic syndrome: respective impacts of job strain, physical activity, and dietary  
20 rhythms. *Chronobiol Int* 2009;26:544-59.  
21  
22  
23 31 de Assis MA, Kupek E, Nahas MV, Bellisle F. Food intake and circadian rhythms  
24 in shift workers with a high workload. *Appetite* 2003;40:175-83.  
25  
26  
27 32 Morikawa Y, Miura K, Sasaki S et al. Evaluation of the effects of shift work on  
28 nutrient intake: a cross-sectional study. *J Occup Health* 2008;50:270-8.  
29  
30  
31 33 Molzof HE, Wirth MD, Burch JB et al. The impact of meal timing on cardiometabolic  
32 syndrome indicators in shift workers. *Chronobiol Int* 2017;34:337-348.  
33  
34  
35 34 Fonken LK, Workman JL, Walton JC et al. Light at night increases body mass by  
36 shifting the time of food intake. *Proc Natl Acad Sci U S A* 2010;107:18664-9.  
37  
38  
39 35 Fonken LK, Nelson RJ. The effects of light at night on circadian clocks and  
40 metabolism. *Endocr Rev* 2014;35:648-70.  
41  
42  
43 36 Corbalan-Tutau D, Madrid JA, Nicolas F, Garaulet M. Daily profile in two circadian  
44 markers "melatonin and cortisol" and associations with metabolic syndrome  
45 components. *Physiol Behav* 2014;123:231-5.  
46  
47  
48 37 Verhoog S, Gubelmann C, Guessous I, Bano A, Franco OH, Marques-Vidal P.  
49 Comparison of the Physical Activity Frequency Questionnaire (PAFQ) with  
50  
51  
52  
53  
54  
55  
56  
57  
58  
59  
60

1  
2  
3 accelerometry in a middle-aged and elderly population: The CoLaus study.  
4  
5 *Maturitas* 2019;129:68-75.  
6

7  
8 38 Ju SY, Jeong HS, Kim DH. Blood vitamin D status and metabolic syndrome in the  
9  
10 general adult population: a dose-response meta-analysis. *J Clin Endocrinol Metab*  
11  
12 2014;99:1053-63.  
13

14  
15 39 Parker J, Hashmi O, Dutton D et al. Levels of vitamin D and cardiometabolic  
16  
17 disorders: systematic review and meta-analysis. *Maturitas* 2010;65:225-36.  
18

19  
20 40 Sun M, Feng W, Wang F et al. Meta-analysis on shift work and risks of specific  
21  
22 obesity types. *Obes Rev* 2018;19:28-40.  
23  
24  
25  
26  
27  
28  
29  
30  
31  
32  
33  
34  
35  
36  
37  
38  
39  
40  
41  
42  
43  
44  
45  
46  
47  
48  
49  
50  
51  
52  
53  
54  
55  
56  
57  
58  
59  
60

**Table 1.** Baseline characteristics according to work schedules

|                                               | Permanent day<br>workers (n = 1905) | Day shift workers<br>(n = 220) | Night shift workers<br>(n = 134) | Permanent night<br>workers (n = 42) | p-value          | N Total |
|-----------------------------------------------|-------------------------------------|--------------------------------|----------------------------------|-------------------------------------|------------------|---------|
| <b>Demographics</b>                           |                                     |                                |                                  |                                     |                  |         |
| Age (years)                                   | 55.0 (50.0–60.0)                    | 55.0 (50.5–59.5)               | 54.5 (50.4–58.6)                 | 53.0 (48.8–57.2)                    | 0.070            | 2275    |
| Men, n (%)                                    | 958 (50.3)                          | 89 (40.5) <sup>a</sup>         | 88 (65.7) <sup>a</sup>           | 18 (42.9)                           | <b>&lt;0.001</b> | 2301    |
| Educational level, n (%)                      |                                     |                                |                                  |                                     | <b>&lt;0.001</b> | 2300    |
| Low                                           | 791 (41.5)                          | 112 (50.9)                     | 71 (53.0)                        | 30 (71.4) <sup>a</sup>              |                  |         |
| Middle                                        | 522 (27.4)                          | 65 (29.5)                      | 40 (29.9)                        | 10 (23.8)                           |                  |         |
| High                                          | 591 (31.0) <sup>a</sup>             | 43 (19.5)                      | 23 (17.2)                        | 2 (4.8)                             |                  |         |
| <b>Anthropometrics</b>                        |                                     |                                |                                  |                                     |                  |         |
| BMI (kg/m <sup>2</sup> )                      | 25.4 (22.6–28.5)                    | 25.5 (23.1–27.6)               | 26.0 (23.2–30.0) <sup>b</sup>    | 27.9 (25.4–31.3) <sup>b,c</sup>     | <b>&lt;0.001</b> | 2228    |
| Waist circumference (cm)                      | 89.5 (81.0–98.5)                    | 89.0 (81.4–96.0)               | 93.0 (84.3–102.0) <sup>b,c</sup> | 95.0 (85.3–109.0) <sup>b,c</sup>    | <b>&lt;0.001</b> | 2227    |
| Waist to hip ratio                            | 0.88 ± 0.09                         | 0.87 ± 0.08                    | 0.90 ± 0.09 <sup>b,c</sup>       | 0.90 ± 0.09                         | <b>0.013</b>     | 2227    |
| <b>Risk factors</b>                           |                                     |                                |                                  |                                     |                  |         |
| Metabolic syndrome, n (%)                     | 327 (17.2)                          | 25 (11.4)                      | 25 (18.7)                        | 17 (40.5) <sup>a</sup>              | <b>&lt;0.001</b> | 2301    |
| Number of metabolic risk factors <sup>†</sup> | 1 (0–2)                             | 1 (0–2)                        | 1 (0–2)                          | 2 (1–3) <sup>b,c</sup>              | <b>0.006</b>     | 2301    |
| Current major depressive disorder, n (%)      | 115 (7.9)                           | 19 (11.7)                      | 10 (9.6)                         | 4 (12.1)                            | 0.319            | 1756    |
| Hypertension, n (%)                           | 653 (34.9)                          | 80 (36.7)                      | 45 (33.6)                        | 12 (28.6)                           | 0.764            | 2263    |

|    |                                             |                  |                  |                                 |                        |                  |      |
|----|---------------------------------------------|------------------|------------------|---------------------------------|------------------------|------------------|------|
| 1  |                                             |                  |                  |                                 |                        |                  |      |
| 2  |                                             |                  |                  |                                 |                        |                  |      |
| 3  | Diabetes, n (%)                             | 100 (5.4)        | 8 (3.7)          | 18 (13.6) <sup>a</sup>          | 4 (9.5)                | <b>&lt;0.001</b> | 2231 |
| 4  |                                             |                  |                  |                                 |                        |                  |      |
| 5  | Dyslipidemia, n (%)                         | 413 (22.5)       | 51 (23.6)        | 29 (22.1)                       | 16 (38.1)              | 0.123            | 2226 |
| 6  |                                             |                  |                  |                                 |                        |                  |      |
| 7  | Sleep drugs, n (%)                          | 109 (5.7)        | 14 (6.4)         | 4 (3.0)                         | 4 (9.5)                | 0.367            | 2301 |
| 8  |                                             |                  |                  |                                 |                        |                  |      |
| 9  | Cardiovascular disease, n (%) <sup>††</sup> | 55 (2.9)         | 12 (5.5)         | 5 (3.7)                         | 3 (7.1)                | 0.102            | 2291 |
| 10 |                                             |                  |                  |                                 |                        |                  |      |
| 11 | <b>Lifestyle factors</b>                    |                  |                  |                                 |                        |                  |      |
| 12 |                                             |                  |                  |                                 |                        |                  |      |
| 13 | Smoking status, n (%)                       |                  |                  |                                 |                        | <b>0.011</b>     | 2246 |
| 14 | Never                                       | 771 (41.4)       | 81 (38.4)        | 51 (39.2)                       | 14 (34.1)              |                  |      |
| 15 |                                             |                  |                  |                                 |                        |                  |      |
| 16 | Former                                      | 689 (37.0)       | 86 (40.8)        | 57 (43.8)                       | 9 (22.0) <sup>a</sup>  |                  |      |
| 17 |                                             |                  |                  |                                 |                        |                  |      |
| 18 | Curent                                      | 404 (21.7)       | 44 (20.9)        | 22 (16.9)                       | 18 (43.9) <sup>a</sup> |                  |      |
| 19 |                                             |                  |                  |                                 |                        |                  |      |
| 20 | Alcohol (units/week)                        | 4 (1–9)          | 3 (0–7)          | 3 (0–7)                         | 2 (0–6)                | <b>0.010</b>     | 2162 |
| 21 |                                             |                  |                  |                                 |                        |                  |      |
| 22 | Coffee consumption, n (%)                   |                  |                  |                                 |                        | 0.961            | 2222 |
| 23 |                                             |                  |                  |                                 |                        |                  |      |
| 24 | None                                        | 186 (10.1)       | 23 (11.0)        | 13 (10.2)                       | 4 (9.8)                |                  |      |
| 25 |                                             |                  |                  |                                 |                        |                  |      |
| 26 | 1-3 cups                                    | 1154 (62.6)      | 134 (64.1)       | 78 (60.9)                       | 28 (68.3)              |                  |      |
| 27 |                                             |                  |                  |                                 |                        |                  |      |
| 28 | ≥4 cups                                     | 504 (27.3)       | 52 (24.9)        | 37 (28.9)                       | 9 (22.0)               |                  |      |
| 29 |                                             |                  |                  |                                 |                        |                  |      |
| 30 | Total energy intake (Kcals/day)             | 1756 ± 664       | 1761 ± 654       | 1828 ± 719                      | 1853 ± 619             | 0.603            | 1996 |
| 31 |                                             |                  |                  |                                 |                        |                  |      |
| 32 | Physical activity                           |                  |                  |                                 |                        |                  |      |
| 33 |                                             |                  |                  |                                 |                        |                  |      |
| 34 | Total energy expenditure (Kcals/day)        | 2656 (2297–3076) | 2698 (2336–3046) | 3118 (2735–3578) <sup>b,c</sup> | 2663 (2356–3164)       | <b>&lt;0.001</b> | 1828 |
| 35 |                                             |                  |                  |                                 |                        |                  |      |
| 36 | Activity ≥4 MET (% total activity)          | 10.1 (1.9–18.4)  | 8.8 (1.2–20.2)   | 14.4 (4.9–25.3) <sup>b</sup>    | 6.5 (0.3–16.1)         | <b>0.005</b>     | 1828 |
| 37 |                                             |                  |                  |                                 |                        |                  |      |
| 38 | Sedentary status, n (%)                     | 758 (49.2)       | 92 (55.1)        | 32 (34.4) <sup>a</sup>          | 16 (57.1)              | <b>0.011</b>     | 1828 |
| 39 |                                             |                  |                  |                                 |                        |                  |      |
| 40 |                                             |                  |                  |                                 |                        |                  |      |
| 41 |                                             |                  |                  |                                 |                        |                  |      |
| 42 |                                             |                  |                  |                                 |                        |                  |      |
| 43 |                                             |                  |                  |                                 |                        |                  |      |
| 44 |                                             |                  |                  |                                 |                        |                  |      |
| 45 |                                             |                  |                  |                                 |                        |                  |      |
| 46 |                                             |                  |                  |                                 |                        |                  |      |

**Blood analysis**

|                            |               |                |                |                |              |      |
|----------------------------|---------------|----------------|----------------|----------------|--------------|------|
| Total cholesterol (mmol/L) | 5.3 ± 0.9     | 5.4 ± 0.9      | 5.3 ± 0.9      | 5.4 ± 1.0      | 0.928        | 2226 |
| HDL cholesterol (mmol/L)   | 1.5 (1.2–1.9) | 1.6 (1.3–1.9)  | 1.4 (1.2–1.8)  | 1.4 (1.1–1.7)  | <b>0.013</b> | 2226 |
| LDL cholesterol (mmol/L)   | 3.2 ± 0.8     | 3.2 ± 0.8      | 3.2 ± 0.8      | 3.2 ± 0.9      | 0.958        | 2226 |
| Triglycerides (mmol/L)     | 1.0 (0.8–1.4) | 1.0 (0.8–1.5)  | 1.1 (0.8–1.5)  | 1.2 (0.9–1.8)  | 0.278        | 2226 |
| Fasting glucose (mmol/L)   | 5.2 (4.9–5.5) | 5.1 (4.8–5.5)  | 5.2 (4.9–5.8)  | 5.5 (5–5.9)    | <b>0.026</b> | 2226 |
| Insulin (microIU/mL)       | 7 (4.8–10.6)  | 7.2 (4.6–10.9) | 7.3 (5.0–11.7) | 8.8 (6.5–12.9) | <b>0.027</b> | 2218 |
| HOMA-IR                    | 1.6 (1.1–2.6) | 1.6 (1.0–2.6)  | 1.7 (1.2–3.2)  | 2.1 (1.5–3.4)  | <b>0.012</b> | 2218 |

**Sleep & vigilance**

|                                                  |            |           |           |           |       |      |
|--------------------------------------------------|------------|-----------|-----------|-----------|-------|------|
| Epworth Sleepiness Scale score                   | 6 (4–8)    | 5 (3–8)   | 6 (4–9)   | 5 (3–8)   | 0.623 | 1786 |
| Excessive daytime sleepiness, n (%) <sup>†</sup> | 182 (12.1) | 20 (12.6) | 14 (14.0) | 3 (11.1)  | 0.950 | 1786 |
| Poor sleep quality, n (%) <sup>††</sup>          | 415 (31.5) | 46 (37.4) | 27 (32.1) | 7 (35.0)  | 0.600 | 1542 |
| High risk of SDB, n (%) <sup>§</sup>             | 321 (21.3) | 34 (21.0) | 29 (28.4) | 8 (27.6)  | 0.323 | 1800 |
| Self-reported total sleep time (h)               | 6.9 ± 1.0  | 6.8 ± 0.9 | 6.9 ± 1.0 | 7.1 ± 1.3 | 0.507 | 1542 |

**Work characteristics**

|                              |             |             |             |             |       |      |
|------------------------------|-------------|-------------|-------------|-------------|-------|------|
| Number of working hours/week | 38.0 ± 14.7 | 38.7 ± 15.2 | 43.1 ± 18.1 | 38.0 ± 15.2 | 0.260 | 2285 |
| Work time, n (%)             |             |             |             |             | 0.397 | 2258 |
| Full-time                    | 1569 (83.8) | 181 (84.6)  | 111 (86.0)  | 39 (92.9)   |       |      |
| <50%                         | 304 (16.2)  | 33 (15.4)   | 18 (14.0)   | 3 (7.1)     |       |      |

|                                              |             |            |           |           |                  |      |
|----------------------------------------------|-------------|------------|-----------|-----------|------------------|------|
| Example of physical intensity at work, n (%) |             |            |           |           | <b>&lt;0.001</b> | 2135 |
| Sedentary (sitting/driving)                  | 1409 (79.5) | 105 (51.2) | 66 (55.0) | 14 (37.8) |                  |      |
| Pushing wheelbarrow                          | 283 (16.0)  | 81 (39.5)  | 40 (33.3) | 16 (43.2) |                  |      |
| Unloading a truck without assist.            | 81 (4.6)    | 19 (9.3)   | 14 (11.7) | 7 (18.9)  |                  |      |

---

Data are presented as mean ± SD or median and interquartile range for continuous variables and number of participants (%) for categorical variables.

Continuous data were analyzed with one-way ANOVA or Kruskal Wallis test follow by Bonferroni's post-hoc or Tamhane's T2 as appropriate. Categorical variables were analyzed using Chi-square test. P-value < 0.05 are shown in bold.

<sup>a</sup> adjusted residual > | 2 | ; <sup>b</sup> statistically different from "day only"; <sup>c</sup> statistically different from "shift work without night".

**Table 2.** Prevalence of metabolic syndrome and its subcomponents according to work schedule

|                     | Permanent<br>day workers<br>( <i>n</i> = 1905) | Day shift<br>workers<br>( <i>n</i> = 220) | Night shift<br>workers<br>( <i>n</i> = 134) | Permanent<br>night workers<br>( <i>n</i> = 42) | <i>p</i> -value  |
|---------------------|------------------------------------------------|-------------------------------------------|---------------------------------------------|------------------------------------------------|------------------|
| Metabolic syndrome  |                                                |                                           |                                             |                                                |                  |
| Men                 | 226 (23.6)                                     | 9 (10.1)                                  | 17 (19.3)                                   | 12 (66.7)                                      | <b>&lt;0.001</b> |
| Women               | 101 (10.7)                                     | 16 (12.2)                                 | 8 (17.4)                                    | 5 (20.8)                                       | 0.225            |
| High BP             | 826 (43.4)                                     | 91 (41.4)                                 | 64 (47.8)                                   | 23 (54.8)                                      | 0.313            |
| High glucose        | 472 (24.8)                                     | 50 (22.7)                                 | 47 (35.1)                                   | 16 (38.1)                                      | <b>0.010</b>     |
| High triglycerides  |                                                |                                           |                                             |                                                |                  |
| Men                 | 243 (26.2)                                     | 25 (29.1)                                 | 18 (21.2)                                   | 11 (61.1)                                      | <b>0.006</b>     |
| Women               | 86 (9.5)                                       | 16 (12.3)                                 | 9 (19.6)                                    | 3 (12.5)                                       | 0.183            |
| Low HDL-cholesterol | 201 (10.9)                                     | 19 (8.8)                                  | 10 (7.6)                                    | 9 (21.4)                                       | 0.064            |
| Visceral obesity    |                                                |                                           |                                             |                                                |                  |
| Men                 | 220 (23.7)                                     | 16 (18.6)                                 | 23 (26.7)                                   | 11 (61.1)                                      | <b>0.002</b>     |
| Women               | 302 (33.3)                                     | 55 (42.3)                                 | 21 (45.7)                                   | 11 (45.8)                                      | 0.051            |

Data are presented as n (%).

Where there was an interaction of outcome\*sex, results are presented separately for men and women, otherwise for the whole cohort.



**Table 3.** Association of each component of the metabolic syndrome with work schedule

|                             | Crude             |              | Model 1           |              | Model 2           |              | Model 3           |         |
|-----------------------------|-------------------|--------------|-------------------|--------------|-------------------|--------------|-------------------|---------|
|                             | OR (95% CI)       | p-value      | OR (95% CI)       | p-value      | OR (95% CI)       | p-value      | OR (95% CI)       | p-value |
| <b>High BP</b>              | <i>n</i> = 2301   |              | <i>n</i> = 2274   |              | <i>n</i> = 2066   |              | <i>n</i> = 1731   |         |
| Permanent day workers       | Ref               | -            | Ref               | -            | Ref               | -            | Ref               | -       |
| Day shift-workers           | 0.92 (0.69-1.22)  | 0.572        | 1.05 (0.78-1.42)  | 0.746        | 1.02 (0.73-1.42)  | 0.907        | 1.06 (0.73-1.54)  | 0.757   |
| Night shift-workers         | 1.19 (0.84-1.70)  | 0.321        | 1.02 (0.70-1.49)  | 0.912        | 0.92 (0.61-1.39)  | 0.682        | 1.01 (0.62-1.63)  | 0.983   |
| Permanent night workers     | 1.58 (0.86-2.92)  | 0.144        | 1.78 (0.93-3.41)  | 0.081        | 1.60 (0.77-3.31)  | 0.204        | 1.90 (0.79-4.58)  | 0.155   |
| <b>High fasting glucose</b> | <i>n</i> = 2301   |              | <i>n</i> = 2274   |              | <i>n</i> = 2066   |              | <i>n</i> = 1731   |         |
| Permanent day workers       | Ref               | -            | Ref               | -            | Ref               | -            | Ref               | -       |
| Day shift-workers           | 0.89 (0.64-1.25)  | 0.504        | 1.05 (0.74-1.50)  | 0.776        | 1.07 (0.73-1.58)  | 0.735        | 1.04 (0.66-1.63)  | 0.883   |
| Night shift-workers         | 1.64 (1.13-2.37)  | <b>0.009</b> | 1.36 (0.91-2.02)  | 0.135        | 1.44 (0.93-2.24)  | 0.106        | 1.26 (0.74-2.14)  | 0.389   |
| Permanent night workers     | 1.87 (0.99-3.51)  | 0.052        | 2.14 (1.07-4.29)  | <b>0.031</b> | 1.70 (0.79-3.64)  | 0.173        | 1.31 (0.52-3.29)  | 0.572   |
| <b>High triglycerides</b>   |                   |              |                   |              |                   |              |                   |         |
| <i>Men</i>                  | <i>n</i> = 1117   |              | <i>n</i> = 1116   |              | <i>n</i> = 1038   |              | <i>n</i> = 886    |         |
| Permanent day workers       | Ref               | -            | Ref               | -            | Ref               | -            | Ref               | -       |
| Day shift-workers           | 1.16 (0.71-1.88)  | 0.562        | 1.14 (0.70-1.87)  | 0.593        | 1.30 (0.77-2.19)  | 0.324        | 1.32 (0.73-2.40)  | 0.360   |
| Night shift-workers         | 0.76 (0.44-1.30)  | 0.313        | 0.74 (0.43-1.28)  | 0.287        | 0.86 (0.49-1.52)  | 0.604        | 0.97 (0.52-1.84)  | 0.936   |
| Permanent night workers     | 4.43 (1.70-11.56) | <b>0.002</b> | 4.31 (1.64-11.30) | <b>0.003</b> | 3.50 (1.19-10.26) | <b>0.023</b> | 3.27 (0.99-10.77) | 0.051   |

|    |                            |                   |              |                   |              |                   |              |                   |              |
|----|----------------------------|-------------------|--------------|-------------------|--------------|-------------------|--------------|-------------------|--------------|
| 1  |                            |                   |              |                   |              |                   |              |                   |              |
| 2  |                            |                   |              |                   |              |                   |              |                   |              |
| 3  | <i>Women</i>               | <i>n</i> = 1109   |              | <i>n</i> = 1105   |              | <i>n</i> = 1020   |              | <i>n</i> = 837    |              |
| 4  |                            |                   |              |                   |              |                   |              |                   |              |
| 5  | Permanent day workers      | Ref               | -            | Ref               | -            | Ref               | -            | Ref               | -            |
| 6  |                            |                   |              |                   |              |                   |              |                   |              |
| 7  | Day shift-workers          | 1.34 (0.76-2.37)  | 0.309        | 1.34 (0.75-2.38)  | 0.320        | 1.19 (0.63-2.24)  | 0.594        | 0.92 (0.41-2.03)  | 0.828        |
| 8  |                            |                   |              |                   |              |                   |              |                   |              |
| 9  | Night shift-workers        | 2.33 (1.09-4.99)  | <b>0.030</b> | 2.29 (1.06-4.95)  | <b>0.035</b> | 2.65 (1.14-6.15)  | <b>0.023</b> | 2.92 (1.03-8.27)  | <b>0.044</b> |
| 10 |                            |                   |              |                   |              |                   |              |                   |              |
| 11 | Permanent night workers    | 1.37 (0.40-4.68)  | 0.618        | 1.36 (0.39-4.73)  | 0.625        | 1.09 (0.30-3.97)  | 0.899        | 0.53 (0.06-4.32)  | 0.549        |
| 12 |                            |                   |              |                   |              |                   |              |                   |              |
| 13 | <b>Low HDL-cholesterol</b> | <i>n</i> = 2226   |              | <i>n</i> = 2221   |              | <i>n</i> = 2058   |              | <i>n</i> = 1723   |              |
| 14 |                            |                   |              |                   |              |                   |              |                   |              |
| 15 | Permanent day workers      | Ref               | -            | Ref               | -            | Ref               | -            | Ref               | -            |
| 16 |                            |                   |              |                   |              |                   |              |                   |              |
| 17 | Day shift-workers          | 0.79 (0.50-1.29)  | 0.336        | 0.75 (0.46-1.23)  | 0.255        | 0.62 (0.28-1.40)  | 0.252        | 0.74 (0.39-1.39)  | 0.348        |
| 18 |                            |                   |              |                   |              |                   |              |                   |              |
| 19 | Night shift-workers        | 0.67 (0.35-1.30)  | 0.240        | 0.60 (0.31-1.18)  | 0.138        | 0.58 (0.29-1.15)  | 0.116        | 0.66 (0.30-1.45)  | 0.300        |
| 20 |                            |                   |              |                   |              |                   |              |                   |              |
| 21 | Permanent night workers    | 2.22 (1.05-4.71)  | <b>0.038</b> | 1.90 (0.89-4.08)  | 0.099        | 1.61 (0.71-3.64)  | 0.252        | 1.47 (0.52-4.18)  | 0.468        |
| 22 |                            |                   |              |                   |              |                   |              |                   |              |
| 23 | <b>Visceral obesity</b>    |                   |              |                   |              |                   |              |                   |              |
| 24 |                            |                   |              |                   |              |                   |              |                   |              |
| 25 | <i>Men</i>                 | <i>n</i> = 1119   |              | <i>n</i> = 1118   |              | <i>n</i> = 1043   |              | <i>n</i> = 890    |              |
| 26 |                            |                   |              |                   |              |                   |              |                   |              |
| 27 | Permanent day workers      | Ref               | -            | Ref               | -            | Ref               | -            | Ref               | -            |
| 28 |                            |                   |              |                   |              |                   |              |                   |              |
| 29 | Day shift-workers          | 0.74 (0.42-1.29)  | 0.288        | 0.75 (0.42-1.34)  | 0.333        | 0.84 (0.47-1.51)  | 0.561        | 0.72 (0.36-1.42)  | 0.341        |
| 30 |                            |                   |              |                   |              |                   |              |                   |              |
| 31 | Night shift-workers        | 1.18 (0.71-1.94)  | 0.525        | 1.11 (0.66-1.84)  | 0.704        | 1.06 (0.61-1.85)  | 0.257        | 0.84 (0.44-1.63)  | 0.612        |
| 32 |                            |                   |              |                   |              |                   |              |                   |              |
| 33 | Permanent night workers    | 5.06 (1.94-13.22) | <b>0.001</b> | 5.27 (1.99-13.98) | <b>0.001</b> | 4.79 (1.64-14.03) | <b>0.004</b> | 3.35 (1.04-10.76) | <b>0.042</b> |
| 34 |                            |                   |              |                   |              |                   |              |                   |              |
| 35 | <i>Women</i>               | <i>n</i> = 1108   |              | <i>n</i> = 1104   |              | <i>n</i> = 1022   |              | <i>n</i> = 839    |              |
| 36 |                            |                   |              |                   |              |                   |              |                   |              |
| 37 | Permanent day workers      | Ref               | -            | Ref               | -            | Ref               | -            | Ref               | -            |
| 38 |                            |                   |              |                   |              |                   |              |                   |              |
| 39 | Day shift-workers          | 1.47 (1.01-2.14)  | <b>0.043</b> | 1.48 (1.01-2.17)  | <b>0.043</b> | 1.31 (0.87-1.97)  | 0.194        | 1.05 (0.65-1.70)  | 0.852        |
| 40 |                            |                   |              |                   |              |                   |              |                   |              |
| 41 |                            |                   |              |                   |              |                   |              |                   |              |
| 42 |                            |                   |              |                   |              |                   |              |                   |              |
| 43 |                            |                   |              |                   |              |                   |              |                   |              |
| 44 |                            |                   |              |                   |              |                   |              |                   |              |
| 45 |                            |                   |              |                   |              |                   |              |                   |              |
| 46 |                            |                   |              |                   |              |                   |              |                   |              |

|                         |                  |       |                  |       |                  |              |                  |       |
|-------------------------|------------------|-------|------------------|-------|------------------|--------------|------------------|-------|
| Night shift-workers     | 1.70 (0.93-3.06) | 0.086 | 1.79 (0.98-3.29) | 0.059 | 1.91 (1.01-3.62) | <b>0.047</b> | 1.51 (0.66–3.10) | 0.324 |
| Permanent night workers | 1.70 (0.75-3.84) | 0.203 | 1.69 (0.73-3.92) | 0.219 | 1.75 (0.72-4.23) | 0.217        | 0.83 (0.23-2.99) | 0.971 |

p-values <0.05 are in bold.

Model 1 was adjusted for age (continuous), age square (continuous), sex (except for sex subanalysis) and educational level (middle, low, high). Model 2 was additionally adjusted for weekly alcohol consumption (continuous), smoking status (never, former, current) and for BMI (normal weight, overweight, obese) (except for visceral obesity). Model 3 was additionally adjusted for daily total energy expenditure (continuous).

For peer review only

## FIGURE LEGENDS

**Figure 1.** Multivariable-adjusted risk of metabolic syndrome according to work schedule and sex.

Data are presented on a logarithmic scale and were analyzed using multivariable logistic regression with adjustment for age, educational level, weekly alcohol consumption, smoking status and daily total energy expenditure (Model 3).

For peer review only

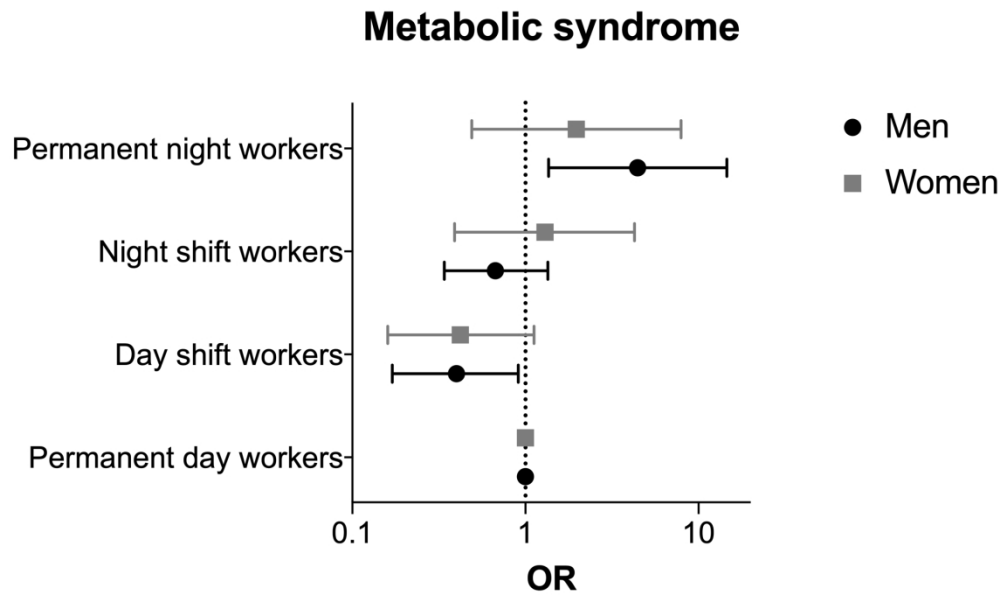

26  
27  
28  
29  
30

Figure 1. Multivariable-adjusted risk of metabolic syndrome according to work schedule and sex. Data are presented on a logarithmic scale and were analyzed using multivariable logistic regression with adjustment for age, educational level, weekly alcohol consumption, smoking status and daily total energy expenditure (Model 3).

31  
32  
33  
34  
35

177x109mm (300 x 300 DPI)

## SUPPLEMENTAL MATERIAL

### Impact of night and shift work on metabolic syndrome and its components in an active middle-aged population-based sample

Virginie Bayon,<sup>1,\*</sup> Mathieu Berger,<sup>1,\*</sup> Geoffroy Solelhac,<sup>1</sup> José Haba-Rubio,<sup>1</sup> Pedro Marques-Vidal,<sup>2</sup> Marie-Pierre Strippoli,<sup>3</sup> Martin Preisig,<sup>3</sup> Damien Leger,<sup>4,5</sup> Raphael Heinzer<sup>1</sup>

<sup>1</sup>Center for Investigation and Research in Sleep (CIRS), Lausanne University Hospital (CHUV) and University of Lausanne, Lausanne, Switzerland; <sup>2</sup>Department of Medicine, Internal Medicine, Lausanne University Hospital (CHUV) and University of Lausanne, Lausanne, Switzerland; <sup>3</sup>Department of Psychiatry, Lausanne University Hospital (CHUV) and University of Lausanne, Lausanne, Switzerland; <sup>4</sup>Université de Paris, VIFASOM (Equipe d'accueil 5330 Vigilance FATigue SOMmeil et Santé Publique), Paris, France ; <sup>5</sup>APHP, Hôtel Dieu, Centre du Sommeil et de la Vigilance, Paris, France.

#### Online Data Supplement:

- **1 Supplementary Figure**
- **1 Supplementary Table**

**Supplementary Figure 1. Study flowchart**

FU: Follow-up

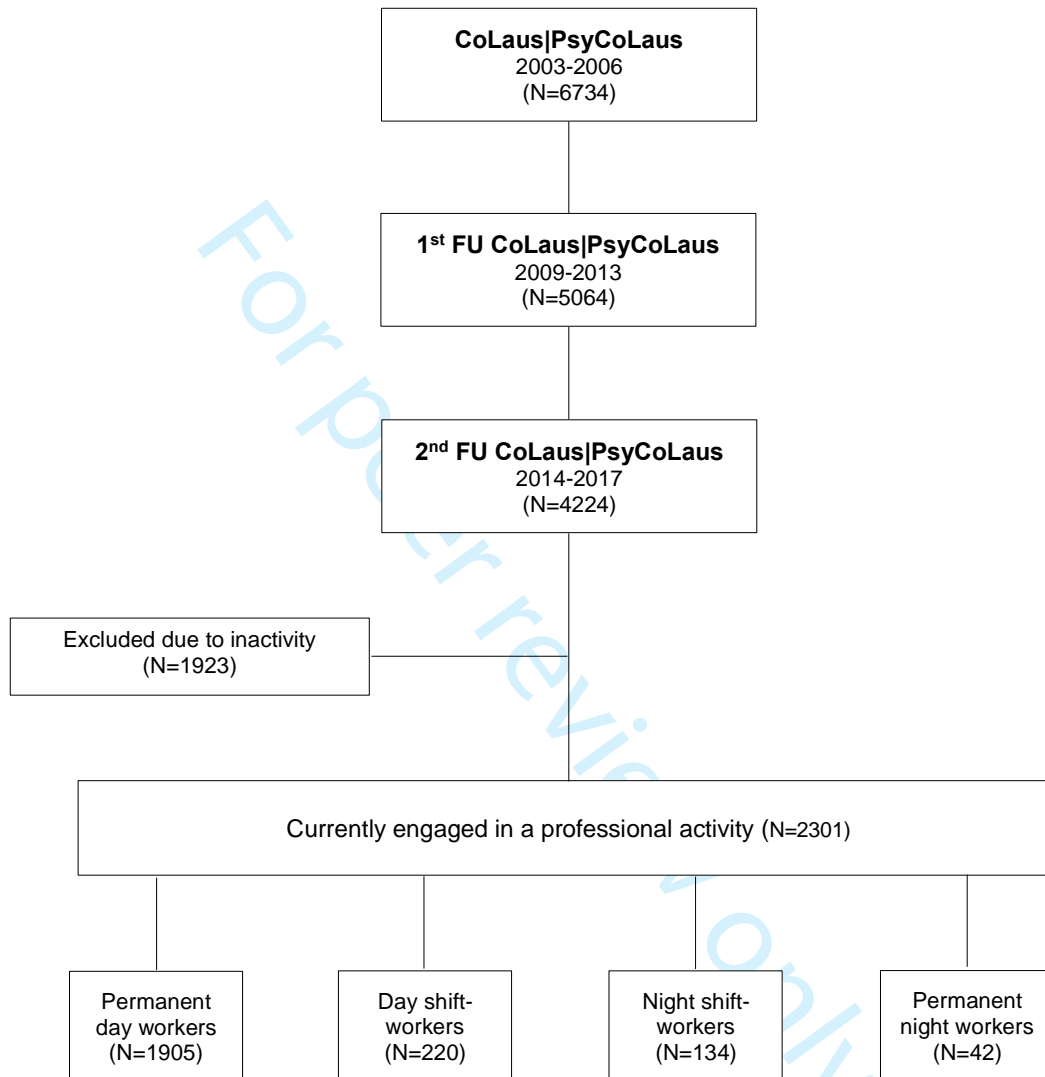

**Supplementary Table 1.** Association of metabolic syndrome with working schedule

|                         | Crude             |                  | Model 1           |              | Model 2           |              |
|-------------------------|-------------------|------------------|-------------------|--------------|-------------------|--------------|
|                         | N (%)             | p-value          | OR (95% CI)       | p-value      | OR (95% CI)       | p-value      |
| <b>Men</b>              | <i>n</i> = 1153   |                  | <i>n</i> = 1059   |              | <i>n</i> = 847    |              |
| Permanent day workers   | Ref               | -                | Ref               | -            | Ref               | -            |
| Day shift-workers       | 0.36 (0.18-0.74)  | <b>0.005</b>     | 0.33 (0.15-0.69)  | <b>0.004</b> | 0.38 (0.17-0.87)  | <b>0.022</b> |
| Night shift-workers     | 0.78 (0.45-1.34)  | 0.365            | 0.71 (0.40-1.26)  | 0.238        | 0.67 (0.33-1.36)  | 0.266        |
| Permanent night workers | 6.48 (2.40-17.46) | <b>&lt;0.001</b> | 6.00 (2.14-16.80) | <b>0.001</b> | 4.37 (1.33-14.38) | <b>0.015</b> |
| <b>Women</b>            | <i>n</i> = 1148   |                  | <i>n</i> = 1048   |              | <i>n</i> = 798    |              |
| Permanent day workers   | Ref               | -                | Ref               | -            | Ref               | -            |
| Day shift-workers       | 1.17 (0.66-2.05)  | 0.594            | 1.15 (0.62-2.12)  | 0.653        | 0.47 (0.17-1.24)  | 0.929        |
| Night shift-workers     | 1.76 (0.80-3.89)  | 0.159            | 1.96 (0.86-4.46)  | 0.107        | 1.38 (0.42-4.57)  | 0.596        |
| Permanent night workers | 2.20 (0.81-6.03)  | 0.124            | 1.84 (0.60-5.64)  | 0.289        | 1.43 (0.28-7.19)  | 0.668        |

p-values <0.05 are in bold.

Model 1 was adjusted for age (continuous), age square (continuous) and educational level (middle, low, high). Model 2 was additionally adjusted for weekly alcohol consumption (continuous), smoking status (never, former, current) and daily total energy expenditure.



1  
2  
3  
4  
5  
6  
7  
8  
9  
10  
11  
12  
13  
14  
15  
16  
17  
18  
19  
20  
21  
22  
23  
24  
25  
26  
27  
28  
29  
30  
31  
32  
33  
34  
35  
36  
37  
38  
39  
40  
41  
42  
43  
44  
45  
46  
47  
48  
49  
50  
51  
52  
53  
54  
55  
56  
57  
58  
59  
60

## STROBE Statement—checklist of items that should be included in reports of observational studies

|                              | Item No | Recommendation                                                                                                                                                                                                                                                                                                                                                                                                                                                                                                                                                                                                                                                                                   | Page number              |
|------------------------------|---------|--------------------------------------------------------------------------------------------------------------------------------------------------------------------------------------------------------------------------------------------------------------------------------------------------------------------------------------------------------------------------------------------------------------------------------------------------------------------------------------------------------------------------------------------------------------------------------------------------------------------------------------------------------------------------------------------------|--------------------------|
| <b>Title and abstract</b>    | 1       | (a) Indicate the study's design with a commonly used term in the title or the abstract<br>(b) Provide in the abstract an informative and balanced summary of what was done and what was found                                                                                                                                                                                                                                                                                                                                                                                                                                                                                                    | 1, 4<br>4                |
| <b>Introduction</b>          |         |                                                                                                                                                                                                                                                                                                                                                                                                                                                                                                                                                                                                                                                                                                  |                          |
| Background/rationale         | 2       | Explain the scientific background and rationale for the investigation being reported                                                                                                                                                                                                                                                                                                                                                                                                                                                                                                                                                                                                             | 5, 6                     |
| Objectives                   | 3       | State specific objectives, including any prespecified hypotheses                                                                                                                                                                                                                                                                                                                                                                                                                                                                                                                                                                                                                                 | 6                        |
| <b>Methods</b>               |         |                                                                                                                                                                                                                                                                                                                                                                                                                                                                                                                                                                                                                                                                                                  |                          |
| Study design                 | 4       | Present key elements of study design early in the paper                                                                                                                                                                                                                                                                                                                                                                                                                                                                                                                                                                                                                                          | 6, 7                     |
| Setting                      | 5       | Describe the setting, locations, and relevant dates, including periods of recruitment, exposure, follow-up, and data collection                                                                                                                                                                                                                                                                                                                                                                                                                                                                                                                                                                  | 6, 7                     |
| Participants                 | 6       | (a) <i>Cohort study</i> —Give the eligibility criteria, and the sources and methods of selection of participants. Describe methods of follow-up<br><i>Case-control study</i> —Give the eligibility criteria, and the sources and methods of case ascertainment and control selection. Give the rationale for the choice of cases and controls<br><i>Cross-sectional study</i> —Give the eligibility criteria, and the sources and methods of selection of participants<br>(b) <i>Cohort study</i> —For matched studies, give matching criteria and number of exposed and unexposed<br><i>Case-control study</i> —For matched studies, give matching criteria and the number of controls per case | 6, 7<br>6, 7             |
| Variables                    | 7       | Clearly define all outcomes, exposures, predictors, potential confounders, and effect modifiers. Give diagnostic criteria, if applicable                                                                                                                                                                                                                                                                                                                                                                                                                                                                                                                                                         | 7, 8                     |
| Data sources/<br>measurement | 8*      | For each variable of interest, give sources of data and details of methods of assessment (measurement). Describe comparability of assessment methods if there is more than one group                                                                                                                                                                                                                                                                                                                                                                                                                                                                                                             | 7, 8                     |
| Bias                         | 9       | Describe any efforts to address potential sources of bias                                                                                                                                                                                                                                                                                                                                                                                                                                                                                                                                                                                                                                        | 9, 10                    |
| Study size                   | 10      | Explain how the study size was arrived at                                                                                                                                                                                                                                                                                                                                                                                                                                                                                                                                                                                                                                                        | 7                        |
| Quantitative variables       | 11      | Explain how quantitative variables were handled in the analyses. If applicable, describe which groupings were chosen and why                                                                                                                                                                                                                                                                                                                                                                                                                                                                                                                                                                     | 9, 10                    |
| Statistical methods          | 12      | (a) Describe all statistical methods, including those used to control for confounding<br>(b) Describe any methods used to examine subgroups and interactions<br>(c) Explain how missing data were addressed<br>(d) <i>Cohort study</i> —If applicable, explain how loss to follow-up was addressed<br><i>Case-control study</i> —If applicable, explain how matching of cases and controls was addressed<br><i>Cross-sectional study</i> —If applicable, describe analytical methods taking account of sampling strategy<br>(e) Describe any sensitivity analyses                                                                                                                                | 9, 10,<br>11<br>10<br>10 |

Continued on next page

| <b>Results</b>           |     |                                                                                                                                                                                                                                                                                                                                                                                                               |                                     |
|--------------------------|-----|---------------------------------------------------------------------------------------------------------------------------------------------------------------------------------------------------------------------------------------------------------------------------------------------------------------------------------------------------------------------------------------------------------------|-------------------------------------|
| Participants             | 13* | (a) Report numbers of individuals at each stage of study—eg numbers potentially eligible, examined for eligibility, confirmed eligible, included in the study, completing follow-up, and analysed<br>(b) Give reasons for non-participation at each stage<br>(c) Consider use of a flow diagram                                                                                                               | Fig. S1<br>10<br>Fig. S1<br>Fig. S1 |
| Descriptive data         | 14* | (a) Give characteristics of study participants (eg demographic, clinical, social) and information on exposures and potential confounders<br>(b) Indicate number of participants with missing data for each variable of interest<br>(c) <i>Cohort study</i> —Summarise follow-up time (eg, average and total amount)                                                                                           | 11<br>Table 1                       |
| Outcome data             | 15* | <i>Cohort study</i> —Report numbers of outcome events or summary measures over time<br><i>Case-control study</i> —Report numbers in each exposure category, or summary measures of exposure<br><i>Cross-sectional study</i> —Report numbers of outcome events or summary measures                                                                                                                             | 11,<br>12                           |
| Main results             | 16  | (a) Give unadjusted estimates and, if applicable, confounder-adjusted estimates and their precision (eg, 95% confidence interval). Make clear which confounders were adjusted for and why they were included<br>(b) Report category boundaries when continuous variables were categorized<br>(c) If relevant, consider translating estimates of relative risk into absolute risk for a meaningful time period | 12,<br>Fig. 1,<br>Table S1          |
| Other analyses           | 17  | Report other analyses done—eg analyses of subgroups and interactions, and sensitivity analyses                                                                                                                                                                                                                                                                                                                | 12,<br>13,<br>Table 3               |
| <b>Discussion</b>        |     |                                                                                                                                                                                                                                                                                                                                                                                                               |                                     |
| Key results              | 18  | Summarise key results with reference to study objectives                                                                                                                                                                                                                                                                                                                                                      | 13                                  |
| Limitations              | 19  | Discuss limitations of the study, taking into account sources of potential bias or imprecision. Discuss both direction and magnitude of any potential bias                                                                                                                                                                                                                                                    | 16                                  |
| Interpretation           | 20  | Give a cautious overall interpretation of results considering objectives, limitations, multiplicity of analyses, results from similar studies, and other relevant evidence                                                                                                                                                                                                                                    | 16,<br>17                           |
| Generalisability         | 21  | Discuss the generalisability (external validity) of the study results                                                                                                                                                                                                                                                                                                                                         | 16,<br>17                           |
| <b>Other information</b> |     |                                                                                                                                                                                                                                                                                                                                                                                                               |                                     |
| Funding                  | 22  | Give the source of funding and the role of the funders for the present study and, if applicable, for the original study on which the present article is based                                                                                                                                                                                                                                                 | 18                                  |

\*Give information separately for cases and controls in case-control studies and, if applicable, for exposed and unexposed groups in cohort and cross-sectional studies.

**Note:** An Explanation and Elaboration article discusses each checklist item and gives methodological background and published examples of transparent reporting. The STROBE checklist is best used in conjunction with this article (freely

1  
2 available on the Web sites of PLoS Medicine at <http://www.plosmedicine.org/>, Annals of Internal Medicine at  
3 <http://www.annals.org/>, and Epidemiology at <http://www.epidem.com/>). Information on the STROBE Initiative is  
4 available at [www.strobe-statement.org](http://www.strobe-statement.org).  
5  
6  
7  
8  
9  
10  
11  
12  
13  
14  
15  
16  
17  
18  
19  
20  
21  
22  
23  
24  
25  
26  
27  
28  
29  
30  
31  
32  
33  
34  
35  
36  
37  
38  
39  
40  
41  
42  
43  
44  
45  
46  
47  
48  
49  
50  
51  
52  
53  
54  
55  
56  
57  
58  
59  
60

For peer review only

# BMJ Open

## Impact of night and shift work on metabolic syndrome and its components: a cross-sectional study in an active middle-aged population-based sample

|                                 |                                                                                                                                                                                                                                                                                                                                                                                                                                                                                                                                                                                                                                                                                                                                                                                   |
|---------------------------------|-----------------------------------------------------------------------------------------------------------------------------------------------------------------------------------------------------------------------------------------------------------------------------------------------------------------------------------------------------------------------------------------------------------------------------------------------------------------------------------------------------------------------------------------------------------------------------------------------------------------------------------------------------------------------------------------------------------------------------------------------------------------------------------|
| Journal:                        | <i>BMJ Open</i>                                                                                                                                                                                                                                                                                                                                                                                                                                                                                                                                                                                                                                                                                                                                                                   |
| Manuscript ID                   | bmjopen-2021-053591.R1                                                                                                                                                                                                                                                                                                                                                                                                                                                                                                                                                                                                                                                                                                                                                            |
| Article Type:                   | Original research                                                                                                                                                                                                                                                                                                                                                                                                                                                                                                                                                                                                                                                                                                                                                                 |
| Date Submitted by the Author:   | 10-Nov-2021                                                                                                                                                                                                                                                                                                                                                                                                                                                                                                                                                                                                                                                                                                                                                                       |
| Complete List of Authors:       | Bayon, Virginie; CHUV) and University of Lausanne<br>Berger, Mathieu; CHUV, Center for Investigation and Research in Sleep<br>Solelhac, Geoffroy; CHUV) and University of Lausanne<br>Haba-Rubio, José; CHUV) and University of Lausanne<br>Marques-Vidal, Pedro; CHUV) and University of Lausanne, Department of<br>Medicine, Internal Medicine<br>Strippoli, Marie-Pierre; CHUV) and University of Lausanne, Department<br>of Psychiatry<br>Preisig, Martin; CHUV) and University of Lausanne, Department of<br>Psychiatry<br>Leger, Damien; Centre du sommeil et de la vigilance, Hôtel Dieu, APHP;<br>Université Paris Descartes, Sorbonne paris Cité, EA 7330 VIFASOM,<br>Sommeil-Vigilance-Fatigue et Santé Publique,<br>Heinzer, Raphael; CHUV) and University of Lausanne |
| <b>Primary Subject Heading</b>: | Epidemiology                                                                                                                                                                                                                                                                                                                                                                                                                                                                                                                                                                                                                                                                                                                                                                      |
| Secondary Subject Heading:      | Diabetes and endocrinology, Occupational and environmental medicine                                                                                                                                                                                                                                                                                                                                                                                                                                                                                                                                                                                                                                                                                                               |
| Keywords:                       | General endocrinology < DIABETES & ENDOCRINOLOGY,<br>EPIDEMIOLOGY, Diabetes & endocrinology < INTERNAL MEDICINE                                                                                                                                                                                                                                                                                                                                                                                                                                                                                                                                                                                                                                                                   |
|                                 |                                                                                                                                                                                                                                                                                                                                                                                                                                                                                                                                                                                                                                                                                                                                                                                   |

SCHOLARONE™  
Manuscripts



I, the Submitting Author has the right to grant and does grant on behalf of all authors of the Work (as defined in the below author licence), an exclusive licence and/or a non-exclusive licence for contributions from authors who are: i) UK Crown employees; ii) where BMJ has agreed a CC-BY licence shall apply, and/or iii) in accordance with the terms applicable for US Federal Government officers or employees acting as part of their official duties; on a worldwide, perpetual, irrevocable, royalty-free basis to BMJ Publishing Group Ltd ("BMJ") its licensees and where the relevant Journal is co-owned by BMJ to the co-owners of the Journal, to publish the Work in this journal and any other BMJ products and to exploit all rights, as set out in our [licence](#).

The Submitting Author accepts and understands that any supply made under these terms is made by BMJ to the Submitting Author unless you are acting as an employee on behalf of your employer or a postgraduate student of an affiliated institution which is paying any applicable article publishing charge ("APC") for Open Access articles. Where the Submitting Author wishes to make the Work available on an Open Access basis (and intends to pay the relevant APC), the terms of reuse of such Open Access shall be governed by a Creative Commons licence – details of these licences and which [Creative Commons](#) licence will apply to this Work are set out in our licence referred to above.

Other than as permitted in any relevant BMJ Author's Self Archiving Policies, I confirm this Work has not been accepted for publication elsewhere, is not being considered for publication elsewhere and does not duplicate material already published. I confirm all authors consent to publication of this Work and authorise the granting of this licence.

1  
2  
3 **Impact of night and shift work on metabolic syndrome and its components: A**  
4 **cross-sectional study in an active middle-aged population-based sample**  
5  
6  
7  
8  
9

10 **Short title:** Impact of night and shift work  
11  
12  
13

14 Virginie Bayon, MD<sup>1,\*</sup> Mathieu Berger, PhD<sup>1,\*</sup> Geoffroy Solelhac, MD<sup>1</sup> José Haba-  
15 Rubio, MD<sup>1</sup> Pedro Marques-Vidal, MD<sup>2</sup> Marie-Pierre F. Strippoli, MSc<sup>3</sup> Martin  
16  
17 Preisig, MD<sup>3</sup> Damien Leger, MD<sup>4,5</sup> Raphael Heinzer, MD<sup>1</sup>  
18  
19  
20  
21  
22

23  
24 <sup>1</sup>Center for Investigation and Research in Sleep (CIRS), Lausanne University  
25 Hospital (CHUV) and University of Lausanne, Lausanne, Switzerland; <sup>2</sup>Department of  
26  
27 Medicine, Internal Medicine, Lausanne University Hospital (CHUV) and University of  
28  
29 Lausanne, Lausanne, Switzerland; <sup>3</sup>Department of Psychiatry, Lausanne University  
30  
31 Hospital (CHUV) and University of Lausanne, Lausanne, Switzerland; <sup>4</sup>Université de  
32  
33 Paris, VIFASOM (Equipe d'accueil 5330 Vigilance FATigue SOMmeil et Santé  
34  
35 Publique), Paris, France ; <sup>5</sup>APHP, Hôtel Dieu, Centre du Sommeil et de la Vigilance,  
36  
37  
38 Paris, France  
39  
40  
41  
42  
43

44 \*these authors contributed equally to this work  
45  
46  
47  
48

49 **Corresponding Author:** Mathieu Berger, PhD, Center for Investigation and  
50  
51 Research in Sleep (CIRS), Lausanne University Hospital (CHUV), Rue du Bugnon  
52  
53 46, 1011 Lausanne, Switzerland. Tel: +41 21 314 86 45. E-mail:  
54  
55 *mathieuberger@outlook.com*  
56  
57  
58  
59  
60

1  
2  
3  
4  
5  
6  
7  
8  
9  
10  
11  
12  
13  
14  
15  
16  
17  
18  
19  
20  
21  
22  
23  
24  
25  
26  
27  
28  
29  
30  
31  
32  
33  
34  
35  
36  
37  
38  
39  
40  
41  
42  
43  
44  
45  
46  
47  
48  
49  
50  
51  
52  
53  
54  
55  
56  
57  
58  
59  
60

**Total word count** (main text only): 3357.

**Number of Tables/Figures:** 4/1

For peer review only

## ABSTRACT

**Objectives** To examine the effects of work schedules on metabolic syndrome and its components in active middle-aged workers.

**Methods** A cross-sectional analysis including active workers from the population-based CoLaus|PsyCoLaus study (Lausanne, Switzerland) was performed. Work schedule was self-reported and defined as follows: permanent day, day shift, night shift, and permanent night work. Associations between work schedule and the risk of metabolic syndrome and its components were analyzed using multivariable-adjusted logistic regressions.

**Results** A total of 2301 active workers (mean age  $56.2 \pm 6.9$  years, 50.1% women) were included. Of these, 1905 were permanent day workers, 220 were day shift workers, 134 were night shift workers and 42 were permanent night shift workers. There were significant interactions between sex and work schedule for metabolic syndrome, high triglycerides and visceral obesity. Men but not women permanent night workers had a higher prevalence of metabolic syndrome than permanent day workers in multivariable-adjusted analyses (OR 4.45 [95% CI 1.36-14.56]). Analysis of metabolic syndrome subcomponents showed that the association between work schedule and metabolic syndrome in men was mainly driven by visceral obesity (OR 3.35 [95% CI 1.04-10.76]). Conversely, women but not men working in night shift were at increased risk of having high triglycerides compared with permanent day workers (OR 2.92 [95% CI 1.03-8.27]).

**Conclusions** The risk of metabolic syndrome is higher in men working in permanent night shift compared with permanent day work and this association could be mediated by visceral obesity.

**Keywords** work schedule, abdominal obesity, risk factors



## STRENGTHS AND LIMITATIONS OF THIS STUDY

- This study evaluated the effects of work schedules on metabolic syndrome and its subcomponent in a general population setting with a precise and extensive assessment of cardio-metabolic phenotypes.
- The association between different shift work schedules and metabolic syndrome was assessed after adjustment for multiple cofounders.
- Because the primary aim of the cohort was not to evaluate the impact of shift work, no precise characterization of workstations and work rhythms (hourly amplitude, direction of rotation, duration of rotations, and duration of exposition) was performed.
- A “healthy worker effect” with a selection of “night shift tolerant” workers cannot be ruled out given the older age of our sample.

## Introduction

Due to economic constraints, efficiency needs or performance objectives, night and shift work (3x8) has become highly prevalent in modern societies. Approximately 18% of all European workers work shifts, and this rate is as high as 35% in some countries<sup>1</sup>. Non-standard working schedules (e.g. shift work, night work) are no longer limited to health and safety workers, but are spread across all industries and services, from manufacturing, to transport, telecommunications and more.

Night and shift work interfere with the physiological circadian rhythm, desynchronizing the biological clock, which can favor systemic inflammation<sup>2</sup>. Night and shift work are also associated with reduced and disturbed sleep<sup>3</sup>. Hence, both circadian disruption and short or poor sleep could be mediators explaining the relationship between night or shift work and chronic health conditions, including increased risk of cardiovascular and metabolic disorders<sup>4</sup>. Moreover, several laboratory-controlled studies showed that circadian rhythm desynchronization and sleep restriction have detrimental effects on neuroendocrine, inflammatory and immune functions<sup>5</sup>.

The health-related impact of atypical work schedules has thus been a topic of interest for some time<sup>6</sup>. Sleep disturbances, decreased vigilance and increased risk of accidents are among the recognized short-term negative effects of night and shift work<sup>7</sup>. Longer-term health effects have also been described, and include increased risk of cardiovascular and metabolic disorders<sup>8 9</sup>. However, the impact of shift work on metabolic syndrome is not yet completely understood.

Metabolic syndrome combines several interrelated metabolic risk factors associated with all-cause mortality<sup>10</sup>. Subjects with metabolic syndrome have a higher risk of cardiovascular disease mortality and morbidity<sup>11</sup>. Metabolic syndrome definition is

1  
2  
3 based on five components: high blood pressure (BP), hyperglycemia, high  
4 triglycerides, low high-density lipoprotein (HDL) cholesterol and visceral obesity. A  
5 higher prevalence of metabolic syndrome and its components among night and shift  
6 workers has previously been suggested in some studies<sup>12 13</sup>. However, the specific  
7 effect of shift work and permanent night work remains largely unknown. Moreover, a  
8 recent systematic review concluded that there was insufficient evidence regarding  
9 the association between shift work and metabolic syndrome when confounding  
10 variables are taken into account<sup>14</sup>.

11  
12 Thus, using data of active workers from a population-based study, the aim of the  
13 present paper was to assess the cross-sectional association between metabolic  
14 syndrome and its components according to four types of work schedules (permanent  
15 day, day shift, night shift and permanent night shift work).

## 32 **Methods**

33  
34  
35 **Study design** cross-sectional analysis of a population-based cohort study.

36  
37  
38  
39  
40 **Population** CoLaus|PsyCoLaus is a population-based cohort exploring the  
41 biological, genetic, and environmental determinants of cardiovascular risk factors,  
42 cardiovascular diseases, and mental disorders in the population of Lausanne,  
43 Switzerland. The methodological aspects (participant recruitment and follow-up) have  
44 been previously reported<sup>15</sup>. Briefly, a simple, non-stratified, random sample of 6,734  
45 subjects from the Lausanne population aged 35-75 years was recruited between  
46 2003 and 2006. The baseline and three follow-up evaluations included physical and  
47 psychiatric exams, blood sampling, and self-completed questionnaires. All data  
48  
49  
50  
51  
52  
53  
54  
55  
56  
57  
58  
59  
60

1  
2  
3 analyzed in the present paper were obtained from the second physical follow-up  
4  
5 evaluation ( $n = 4881$ ), which took place between 2014 and 2017.  
6  
7  
8  
9

### 10 **Patient and Public Involvement**

11  
12 No patients or public were involved in this study design, conduct or analysis.  
13  
14

15  
16 **Exposure and eligibility criteria** Professional activity and working hours were self-  
17  
18 reported using the following questions: “Are you currently engaged in a professional  
19  
20 activity?”; “What is your usual work schedule?” (day exclusively, rotation with no night  
21  
22 work, rotation with night work, night work only). The number of work hours per week  
23  
24 was also recorded. Participants not currently engaged in a professional activity were  
25  
26 excluded from the present analysis. No other exclusion criteria were applied.  
27  
28  
29  
30  
31

32 **Outcome assessment** Metabolic syndrome was defined according to the Joint  
33  
34 Interim Statement <sup>16</sup> as the presence of at least three of the following five conditions:  
35  
36 high BP (systolic BP  $\geq 130$  mm Hg or diastolic BP  $\geq 85$  mm Hg or use of  
37  
38 antihypertensive medication); visceral obesity (waist circumference  $\geq 88$  cm in women  
39  
40 or  $\geq 102$  cm in men); high triglycerides ( $\geq 1.7$  mmol/L, or use of fibrates or nicotinic  
41  
42 acid); low HDL-cholesterol levels ( $< 1.30$  mmol/L in women or  $< 1.03$  mmol/L in men,  
43  
44 or use of fibrates or nicotinic acid); and high fasting plasma glucose ( $\geq 5.6$  mmol/L or  
45  
46 use of anti-diabetic medication). Blood pressure was measured three times on the  
47  
48 left arm using an Omron® HEM-907 (Matsusaka, Japan) automated oscillometric  
49  
50 sphygmomanometer after at least a 10-min rest in the seated position. The mean of  
51  
52 the last two measures was used. Venous blood samples were drawn after an  
53  
54 overnight fast to measure the levels of glucose, HDL cholesterol, low HDL-  
55  
56 cholesterol, and triglycerides. Biological assays were performed at the clinical  
57  
58  
59  
60

laboratory of the Lausanne university hospital within two hours of blood collection. Index of insulin resistance during fasting was assessed by the homeostatic model assessment of insulin resistance (HOMA-IR), calculated as the fasting insulin level (in milliunits per milliliter) times the fasting glucose level (in milligrams per liter) divided by 405. Waist circumference was measured twice with a non-stretchable tape over the unclothed abdomen at the mid-point between the lowest rib and the iliac crest. Hip circumference was also measured twice at the greater trochanters. For waist and hip, the mean of the two measurements was used and the waist-to-hip ratio (WHR) was calculated.

**Covariates** The current socio-professional category was self-reported by participants. Sociodemographic (age, sex) and lifestyle (smoking habit, alcohol intake, coffee consumption) data were collected by self-administered questionnaires. Educational level was categorized as *low* (primary), *middle* (apprenticeship or secondary school) or *high* (university). Smoking status was categorized as *never*, *former* or *current*. Body weight and height were measured with participants standing without shoes in light indoor clothing. Body weight was measured in kilograms to the nearest 0.1 kg using a Seca™ scale (Seca, Hamburg, Germany). Height was measured to the nearest 5 mm using a Seca™ height gauge (Seca, Hamburg, Germany). Body mass index (BMI) was defined as weight (kg)/height<sup>2</sup> (m<sup>2</sup>). Obesity was defined as BMI ≥ 30 kg/m<sup>2</sup>.

Medication use was coded according to the World Health Organization Anatomical Therapeutic Chemical (ATC) Classification System (<http://www.whooc.no/atcddd>). Drugs influencing sleep included hypnotics or sedatives (N05C), anxiolytics (N05B) and antipsychotics (N05A). Diabetes was

1  
2  
3 defined as fasting plasma glucose levels  $\geq 7.0$  mmol/L or use of antidiabetic  
4 medication<sup>17</sup>. Hypertension was defined as systolic BP  $\geq 140$  mm Hg and/or diastolic  
5 BP  $\geq 90$  mm Hg, and/or current use of antihypertensive medication.  
6  
7

8  
9  
10 The presence of a current major depressive disorder was retrospectively  
11 assigned according to Diagnostic and Statistical Manual of Mental Disorders, Fourth  
12 Edition (DSM-IV) criteria with information collected at the second and third psychiatric  
13 follow-up evaluation using the French translation of the semi-structured Diagnostic  
14 Interview for Genetic Studies (DIGS). Cardiovascular disease was defined as  
15 previous stroke, heart attack, coronary artery bypass grafting or percutaneous  
16 coronary intervention.  
17  
18

19  
20 Subjective sleep characteristics were determined using the Pittsburgh Sleep  
21 Quality Index (PSQI)<sup>18</sup>, the Epworth Sleepiness Scale (ESS)<sup>19</sup>, and the Berlin  
22 questionnaire for sleep-disordered breathing (SDB)<sup>20</sup>. Sleep quality was assessed  
23 with the PSQI and dichotomized into good/poor sleep quality (score  $\leq 5$ / $> 5$ ), and  
24 excessive daytime sleepiness (EDS) was defined as an ESS score  $> 10$ ). A Berlin  
25 score  $\geq 2$  was defined as indicating a high risk of SDB.  
26  
27

28  
29 Dietary intake was evaluated using a validated Food Frequency Questionnaire  
30 (FFQ) querying the consumption of 97 different food items including portion size over  
31 the previous 4 weeks. The daily total energy intake was obtained as well as the  
32 proportion of macronutrients, alcohol and fibers.  
33  
34

35  
36 Physical activity was evaluated with the physical activity frequency  
37 questionnaire (PAFQ)<sup>21</sup>. The questionnaire lists 70 types of physical activity from  
38 various domains (e.g. occupational, housework, leisure time, sports, etc.) and  
39 participants indicated the number of days in the past week (0–7) and the duration per  
40 day (0–10 h, in 15-minute increments) for each activity. Energy expenditure  
41  
42  
43  
44  
45  
46  
47  
48  
49  
50  
51  
52  
53  
54  
55  
56  
57  
58  
59  
60

1  
2  
3 corresponds to the sum of all the energy expenditure over one week divided by 7 to  
4  
5 obtain a mean energy expenditure over a 24-hour period. Sedentary status was  
6  
7 defined as spending more than 90% of daily energy in activities below moderate and  
8  
9 high intensity (defined as requiring at least 4 times the basal metabolic rate [BMR]).  
10  
11 The percentage of total energy >4 metabolic equivalents (METS) was also calculated  
12  
13 to quantify moderate and high intensity physical activity.  
14  
15  
16  
17  
18

19 **Statistical analysis** Data distribution was graphically assessed using a normal Q-Q  
20  
21 plot. Data were presented as number of participants (%) for categorical variables,  
22  
23 mean  $\pm$  SD for normal distribution, or median and interquartile range for non-normally  
24  
25 distributed continuous variables. Univariate analyses of continuous data were  
26  
27 performed using one-way ANOVA or Kruskal Wallis test follow by Bonferroni's post-  
28  
29 hoc or Tamhane's T2 as appropriate. Categorical variables were analyzed using Chi-  
30  
31 square test or Fisher's exact test as appropriate. The associations between working  
32  
33 schedules (permanent day, day shift work, night shift work and permanent night  
34  
35 work) and metabolic syndrome (and its subcomponents) were determined using  
36  
37 logistic regression analysis. Prior to this, the interaction of sex with the metabolic  
38  
39 syndrome and each of its subcomponents was tested. In case of significant  
40  
41 interaction, results were presented for both men and women, otherwise results were  
42  
43 shown for the whole sample. Each cardiometabolic risk factor was first tested in  
44  
45 univariate analysis (crude) then in two models with serial adjustment for potential  
46  
47 confounders. Model 1 was adjusted for age (continuous), educational level (low,  
48  
49 middle, high) and sex (except in case of significant sex\*outcome interaction). Model  
50  
51 2: Model 1 plus weekly alcohol consumption (continuous), smoking status (never,  
52  
53 former, current) and BMI (normal weight, overweight, obese; except for visceral  
54  
55  
56  
57  
58  
59  
60

1  
2  
3 obesity). Model 3: Model 2 plus daily total energy expenditure (continuous). Box-  
4  
5 Tidwell tests were used to check the assumption of linearity for the logit of each  
6  
7 covariate. If the assumption was violated, the square of the covariate was used or the  
8  
9 covariate was transformed into categorical variable. To assess collinearity between  
10  
11 covariates, a linear regression analysis including all covariates was performed, and  
12  
13 the variance inflation factor (VIF) was calculated. A VIF  $\leq 5$  was considered as  
14  
15 absence of multi-collinearity. Results from logistic regression are presented as OR  
16  
17 values with 95% CI. Permanent day workers were considered as the reference  
18  
19 group.  
20  
21  
22

23 All statistical analyses were performed using IBM SPSS Statistics version 26.0  
24  
25 for Macintosh (IBM Corp). Significant results were considered for a two-sided test  
26  
27 with  $p < 0.05$ .  
28  
29  
30  
31  
32

## 33 Results

34  
35 **Population characteristics** A total of 2301 participants were engaged in a  
36  
37 professional activity at the second follow-up of the CoLaus|PsyCoLaus study. Among  
38  
39 them, 1905 worked exclusively during the daytime (permanent day workers), 220  
40  
41 were rotation workers with no night work (day shift workers), 134 were rotation  
42  
43 workers with night work (night shift workers) and 42 worked exclusively during the  
44  
45 night (permanent night workers) (Supplementary Figure 1).  
46  
47  
48

49 Table 1 and 2 shows the baseline characteristics of the sample according to  
50  
51 the four different work schedules. The mean age of the participants was  $56.2 \pm 6.9$   
52  
53 years and half of the sample (50.1%) were women. The proportions of men/women  
54  
55 differed significantly according to work schedule: women were more likely to work in  
56  
57 day shift and permanent night shift roles, while men were more likely to do night shift  
58  
59  
60



1  
2  
3 work. Mean BMI and waist circumference were significantly higher in night shift  
4 workers and permanent night workers compared with permanent day workers and  
5 day shift workers ( $p<0.001$ ). Permanent night shift workers were more likely to smoke  
6 than other groups, whereas night shift workers were less sedentary than their  
7 counterparts. Lipid levels and blood glucose analysis, and sleep parameters in the  
8 different work schedule groups are also shown in Table 1 and 2.  
9  
10  
11  
12  
13  
14  
15  
16  
17  
18

### 19 **Prevalence of metabolic syndrome and its components according to work**

20 **schedules** There were significant interactions between sex and work schedule for  
21 metabolic syndrome ( $p=0.009$ ), high triglycerides ( $p=0.043$ ) and visceral obesity  
22 ( $p=0.047$ ), but not for high BP, high glucose and low HDL-cholesterol.  
23  
24  
25  
26  
27

28 The prevalence of the metabolic syndrome was almost three times higher in  
29 men permanent night workers compared with men permanent day workers; a similar  
30 trend was found for the prevalence of visceral obesity and low HDL-cholesterol  
31 (Table 3). The prevalence of high glucose level in night shift workers and permanent  
32 night workers was nearly double that in permanent day workers (Table 3).  
33  
34  
35  
36  
37  
38  
39  
40  
41

### 42 **Association between metabolic syndrome and work schedules by patient sex**

43 Compared to men permanent day workers, permanent night workers showed a  
44 higher risk of metabolic syndrome in univariate analysis (OR 6.48 [95% CI 2.40-  
45 17.46]; Supplementary Table 1). This significant association persisted after  
46 adjustment for age, educational level, alcohol consumption, smoking status and daily  
47 total energy expenditure (OR 4.45 [95% CI 1.36-14.56]) (Figure 1). Conversely, the  
48 risk of metabolic syndrome in day shift-workers was lower than that in permanent day  
49 workers in crude analysis (OR 0.36 [95% CI 0.18-0.74]), and after adjustment in  
50  
51  
52  
53  
54  
55  
56  
57  
58  
59  
60

1  
2  
3 models 1 and 2 and 3 (Supplementary Table 1). No significant association between  
4  
5 work schedule and metabolic syndrome was found for women.  
6  
7  
8  
9

### 10 **Association of each component of metabolic syndrome with work schedule**

11  
12 In men, the risk of visceral obesity in permanent night workers was significantly  
13  
14 higher than that in permanent day workers, including after adjustment for covariates  
15  
16 (Table 4). Moreover, the risk of elevated triglyceride levels in permanent night  
17  
18 workers was increased in the crude analysis and after adjustment for age,  
19  
20 educational level, alcohol consumption, smoking status and BMI (model 2), but was  
21  
22 no longer significant in the fully adjusted model 3 (Table 4).  
23  
24  
25

26 In women, night shift-workers showed a higher risk of elevated triglyceride levels,  
27  
28 which persisted after multiple adjustments (Table 4).  
29  
30  
31  
32

### 33 **Discussion**

34  
35 In our middle-aged active general population sample, we found differential  
36  
37 associations between permanent night work and the risk of metabolic syndrome for  
38  
39 men and women. Indeed, permanent night work was only associated with a higher  
40  
41 risk of metabolic syndrome in men but not in women. This association could be  
42  
43 mediated by a higher risk of visceral obesity in men. The increased risk of metabolic  
44  
45 syndrome is in line with previous studies<sup>22</sup>. Some studies even showed that the risk  
46  
47 for the development of metabolic syndrome and each of its components gradually  
48  
49 and independently increases with accumulated years of shift work<sup>23</sup>. Contrary to  
50  
51 other studies, we found no association between permanent night work or night shift-  
52  
53 work and metabolic syndrome in women<sup>24 25</sup>. In contrast to the findings on the  
54  
55 metabolic syndrome as a whole, for the triglycerides component we found an  
56  
57  
58  
59  
60

1  
2  
3 increased risk of elevated concentrations among shift workers in women but not in  
4  
5 men. This supports previous evidence from Karlsson *et al.* who also reported an  
6  
7 elevated triglyceride level among shift workers in 60-year-old women<sup>26</sup>.  
8  
9

10 While the mechanisms underlying the observed increased risk of metabolic  
11  
12 syndrome in shift or night workers have not been fully elucidated, several explanatory  
13  
14 hypotheses can be proposed. Firstly, sleep duration has been suggested to play a  
15  
16 key role in the development of metabolic syndrome. A previous meta-analysis found  
17  
18 that short sleep duration was significantly associated with a 27% increase in risk of  
19  
20 metabolic syndrome whereas long sleep duration was not<sup>27</sup>. Similar results were  
21  
22 found in both men and women. In our study, self-reported sleep duration did not differ  
23  
24 between the different groups of workers and therefore does not explain the increased  
25  
26 risk of metabolic syndrome observed in permanent night workers among men.  
27  
28 However, we cannot rule out that our findings might have been different if objective  
29  
30 sleep duration measures were used because objective and subjective sleep duration  
31  
32 can differ significantly. Unfortunately, objective sleep assessment could not be  
33  
34 included in our analysis. Moreover, sleep fragmentation or an alteration of sleep  
35  
36 structure due to irregular sleep schedule or circadian rhythm misalignment in night  
37  
38 workers cannot be excluded and could be a possible explanation for the increased  
39  
40 risk of metabolic syndrome<sup>28 29</sup>.  
41  
42  
43  
44  
45

46 Secondly, dietary habits could contribute to development of the metabolic  
47  
48 syndrome in night or shift workers, but available studies on this subject are scarce. A  
49  
50 cross-sectional study comparing 98 rotating shift workers to 100 regular day workers  
51  
52 demonstrated that total energy intake and contributions of macronutrients did not  
53  
54 differ between the two groups, except for saturated lipids (+10% in shift workers)<sup>30</sup>.  
55  
56 However, meal distribution was different in the two groups. Similar to other studies<sup>31</sup>  
57  
58  
59  
60

1  
2  
3<sup>32</sup>, we failed to demonstrate a difference in food intake and macronutrients  
4  
5 components between night shift workers or permanent night workers compared with  
6  
7 permanent day workers. Available data from our study mean that, unfortunately, we  
8  
9 cannot rule out the possibility that night shift workers may have had a different  
10  
11 circadian distribution of food intake rather than an increase in total daily intake<sup>33</sup>.  
12  
13

14  
15 Thirdly, circadian rhythm desynchronization could be a major contributor to the  
16  
17 increased risk of metabolic syndrome among night and shift workers. Still, the  
18  
19 underlying pathophysiological mechanisms of this association remain poorly  
20  
21 understood. Some animal studies suggested that reduced melatonin production, due  
22  
23 to circadian rhythm disruption, could be associated with a higher rate of metabolic  
24  
25 syndrome<sup>34</sup>. Furthermore, Fonken *et al.* hypothesized that exposure to light at night  
26  
27 altered circadian organization and affected metabolic parameters in mice<sup>35</sup>. Their  
28  
29 results emphasized that even weak night lighting (5 lux) is sufficient to desynchronize  
30  
31 food consumption and physical activity rhythms, which could explain the observed  
32  
33 metabolic disorders<sup>34</sup>. In humans, Corbalan-Tutau *et al.* reported a reduced daily  
34  
35 amplitude in melatonin and cortisol circadian patterns associated with metabolic  
36  
37 disturbances in women<sup>36</sup>. Unfortunately, we did not measure melatonin and cortisol  
38  
39 to confirm these findings in our sample.  
40  
41  
42  
43

44  
45 With regard to physical activity, we surprisingly found that night shift workers  
46  
47 were more active than day shift workers and permanent day workers. This may be  
48  
49 due to greater opportunities to perform a physical activity compared with other diurnal  
50  
51 workers or to more physically active work among night shift workers, although this  
52  
53 should be interpreted with caution due to limited agreement between estimates of  
54  
55 activity obtained by PAFQ and those obtained from accelerometers<sup>37</sup>.  
56  
57  
58  
59  
60

1  
2  
3 Finally, the higher risk of metabolic syndrome we observed in night shift  
4 workers may be explained by a vitamin D deficiency<sup>38</sup>. It has been shown that high  
5 levels of vitamin D among middle-aged and elderly populations are associated with a  
6 substantial decrease in cardiovascular disease, type 2 diabetes and metabolic  
7 syndrome<sup>39</sup>. Although we did not measure the vitamin D levels in our different groups  
8 of workers, we can hypothesize that permanent night workers have lower exposure  
9 to sunlight and may therefore be at higher risk of vitamin D deficiency.  
10  
11  
12  
13  
14  
15  
16  
17  
18

19 In our study, among the components of the metabolic syndrome, an elevated  
20 risk of visceral obesity was found in men permanent night workers. This finding is  
21 consistent with a recent meta-analysis which found that shift workers had a higher  
22 frequency of abdominal obesity than other obesity types and permanent night  
23 workers demonstrated a 29% higher risk of central obesity than rotating shift  
24 workers<sup>40</sup>.  
25  
26  
27  
28  
29  
30  
31  
32

33 The main strength of the present study is its large population-based sample  
34 with a precise and extensive assessment of cardio-metabolic phenotypes. Indeed,  
35 previous studies were mainly performed in specific populations of workers or in  
36 particular sectors of activity, such as public health and emergency, which limit the  
37 generalizability to other types of shift or night work. In addition, most studies have  
38 assessed the risk of metabolic syndrome in shift workers compared with day workers,  
39 but few studies have differentiated between shift workers, permanent night workers  
40 and shift workers with and without night work.  
41  
42  
43  
44  
45  
46  
47  
48  
49  
50

51 There are also some limitations that need to be mentioned. First, this study  
52 had a cross-sectional design which did not allow to assess causality but only cross-  
53 sectional associations that remain to be confirmed in prospective studies. Because  
54 the primary aim of the CoLaus|PsyCoLaus study was not to evaluate the impact of  
55  
56  
57  
58  
59  
60

1  
2  
3 shift work, the questions related to shift work were only asked at the follow-up 2  
4 (2014-2017), preventing us to investigate longitudinal associations. Moreover, no  
5  
6 precise characterization of workstations and work rhythms (hourly amplitude,  
7  
8 direction of rotation, duration of rotations, and duration of exposition) was performed.  
9  
10  
11 Second, a “healthy worker effect” with a selection of “night shift tolerant” workers  
12  
13 cannot be ruled out given the older age of our sample. Third, there were some  
14  
15 missing data on self-reported sleep habits and diet parameters and, despite the use  
16  
17 of validated questionnaires, declaration bias remains possible. Similarly, only self-  
18  
19 reported physical activity was assessed in this study and it would have been  
20  
21 interesting to have objective measures of physical activity and sleep to more  
22  
23 accurately investigate their influence.  
24  
25  
26  
27  
28  
29

## 30 **CONCLUSION**

31  
32 Only men permanent night workers were at increased risk of metabolic syndrome  
33  
34 compared with permanent day workers, and this association persisted after  
35  
36 adjustment for sociodemographic confounders and daily total energy expenditure.  
37  
38 From a clinical point of view, we advise monitor of not only BMI but also visceral  
39  
40 obesity, particularly in men permanent night workers. Further prospective studies are  
41  
42 needed to confirm theses cross-sectional results and elucidate the underline  
43  
44 mechanisms.  
45  
46  
47  
48  
49  
50  
51  
52  
53  
54  
55  
56  
57  
58  
59  
60

## ARTICLE INFORMATION

### Acknowledgments

The authors thank Prof. Mehdi Tafti, Prof. Vincent Mooser, Daniela Andries and Nadia Tobback for their important contribution to the HypnoLaus and CoLaus|PsyCoLaus Cohorts, the Lausanne population who volunteered to participate in the CoLaus|PsyCoLaus and HypnoLaus studies, as well as the whole team of CoLaus|PsyCoLaus.

### Funding

The HypnoLaus and the CoLaus/ PsyCoLaus studies were and are supported by research grants from GlaxoSmithKline ('not applicable'), the Faculty of Biology and Medicine of Lausanne ('not applicable'), the Swiss National Science Foundation (grants 3200B0-105993, 3200B0-118308, 33CSCO-122661, 33CS30-139468 and 33CS30- 148401), Leenaards Foundation ('not applicable'), and Vaud Pulmonary League ('not applicable'). The contents of this research are solely the responsibility of the authors.

### Author Disclosures

The authors have no conflicts of interest to declare.

### Contributors

VB, MB, PMV, MP and RH designed the study. JHR, PMV, MPFS, MP and RH collected the data. MB performed the statistical analysis. VB, MB, GS, JHR, PMV, MPFS, MP, DL and RH interpreted the data. VB and MB wrote the first draft of the manuscript and GS, JHR, PMV, MPFS, MP, DL and RH critically reviewed the

1  
2  
3 manuscript. All authors undertake to give final approval of the version to be published  
4  
5 and agree to be accountable for all aspects of the work. VB is the guarantor of this  
6  
7 work and, as such, had full access to all the data in the study and takes responsibility  
8  
9 for the integrity of the data and the accuracy of the data analysis.  
10  
11  
12  
13

#### 14 **Data availability statement**

15  
16 Data may be obtained from a third party and are not publicly available. All data  
17  
18 relevant to the study are included in the article or uploaded as supplementary  
19  
20 information.  
21  
22  
23  
24  
25

#### 26 **Ethics statements**

##### 27 28 1. Patient consent for publication

29  
30 Not applicable.  
31  
32

##### 33 2. Ethics approval

34  
35 The study was approved by the Institutional Ethics Committee of the University of  
36  
37 Lausanne (decision reference 33/09) and written informed consent was obtained from  
38  
39 all subjects. A copy of the written Informed Consent form was handed out to the  
40  
41 subjects. A further copy was provided for the archives of the study in the Center for  
42  
43 Investigation and Research in Sleep (CIRS, Lausanne University Hospital,  
44  
45 Switzerland).  
46  
47  
48  
49  
50  
51  
52  
53  
54  
55  
56  
57  
58  
59  
60



## References

- 1 Nappo N. Is there an association between working conditions and health? An analysis of the Sixth European Working Conditions Survey data. *PLoS One* 2019;14:e0211294.
- 2 Puttonen S, Viitasalo K, Harma M. Effect of shiftwork on systemic markers of inflammation. *Chronobiol Int* 2011;28:528-35.
- 3 Sallinen M, Kecklund G. Shift work, sleep, and sleepiness - differences between shift schedules and systems. *Scand J Work Environ Health* 2010;36:121-33.
- 4 Knutson KL, Spiegel K, Penev P, Van Cauter E. The metabolic consequences of sleep deprivation. *Sleep Med Rev* 2007;11:163-78.
- 5 Faraut B, Bayon V, Leger D. Neuroendocrine, immune and oxidative stress in shift workers. *Sleep Med Rev* 2013;17:433-44.
- 6 Kecklund G, Axelsson J. Health consequences of shift work and insufficient sleep. *BMJ* 2016;355:i5210.
- 7 Drake CL, Roehrs T, Richardson G, Walsh JK, Roth T. Shift work sleep disorder: prevalence and consequences beyond that of symptomatic day workers. *Sleep* 2004;27:1453-62.
- 8 Morikawa Y, Nakagawa H, Miura K et al. Effect of shift work on body mass index and metabolic parameters. *Scand J Work Environ Health* 2007;33:45-50.
- 9 Wang D, Ruan W, Chen Z, Peng Y, Li W. Shift work and risk of cardiovascular disease morbidity and mortality: A dose-response meta-analysis of cohort studies. *Eur J Prev Cardiol* 2018;25:1293-1302.
- 10 Wu SH, Liu Z, Ho SC. Metabolic syndrome and all-cause mortality: a meta-analysis of prospective cohort studies. *Eur J Epidemiol* 2010;25:375-84.

- 1  
2  
3 11 Galassi A, Reynolds K, He J. Metabolic syndrome and risk of cardiovascular  
4 disease: a meta-analysis. *Am J Med* 2006;119:812-9.  
5  
6  
7  
8 12 Karlsson B, Knutsson A, Lindahl B. Is there an association between shift work and  
9 having a metabolic syndrome? Results from a population based study of 27,485  
10 people. *Occup Environ Med* 2001;58:747-52.  
11  
12  
13 13 Violanti JM, Burchfiel CM, Hartley TA et al. Atypical work hours and metabolic  
14 syndrome among police officers. *Arch Environ Occup Health* 2009;64:194-201.  
15  
16  
17 14 Canuto R, Garcez AS, Olinto MT. Metabolic syndrome and shift work: a systematic  
18 review. *Sleep Med Rev* 2013;17:425-31.  
19  
20  
21  
22 15 Firmann M, Mayor V, Vidal PM et al. The CoLaus study: a population-based study  
23 to investigate the epidemiology and genetic determinants of cardiovascular risk  
24 factors and metabolic syndrome. *BMC Cardiovasc Disord* 2008;8:6.  
25  
26  
27 16 Alberti KG, Eckel RH, Grundy SM et al. Harmonizing the metabolic syndrome: a  
28 joint interim statement of the International Diabetes Federation Task Force on  
29 Epidemiology and Prevention; National Heart, Lung, and Blood Institute; American  
30 Heart Association; World Heart Federation; International Atherosclerosis Society;  
31 and International Association for the Study of Obesity. *Circulation* 2009;120:1640-  
32 5.  
33  
34  
35  
36  
37  
38  
39  
40  
41  
42  
43  
44 17 American Diabetes A. Diagnosis and classification of diabetes mellitus. *Diabetes*  
45 *Care* 2014;37 Suppl 1:S81-90.  
46  
47  
48  
49 18 Buysse DJ, Reynolds CF, 3rd, Monk TH, Berman SR, Kupfer DJ. The Pittsburgh  
50 Sleep Quality Index: a new instrument for psychiatric practice and research.  
51 *Psychiatry Res* 1989;28:193-213.  
52  
53  
54  
55  
56 19 Johns MW. A new method for measuring daytime sleepiness: the Epworth  
57 sleepiness scale. *Sleep* 1991;14:540-5.  
58  
59  
60

- 1  
2  
3 20 Netzer NC, Stoohs RA, Netzer CM, Clark K, Strohl KP. Using the Berlin  
4  
5 Questionnaire to identify patients at risk for the sleep apnea syndrome. *Ann Intern*  
6  
7 *Med* 1999;131:485-91.  
8  
9  
10 21 Bernstein M, Sloutskis D, Kumanyika S, Sparti A, Schutz Y, Morabia A. Data-based  
11  
12 approach for developing a physical activity frequency questionnaire. *Am J*  
13  
14 *Epidemiol* 1998;147:147-54.  
15  
16  
17 22 Wang F, Zhang L, Zhang Y et al. Meta-analysis on night shift work and risk of  
18  
19 metabolic syndrome. *Obes Rev* 2014;15:709-20.  
20  
21  
22 23 De Bacquer D, Van Risseghem M, Clays E, Kittel F, De Backer G, Braeckman L.  
23  
24 Rotating shift work and the metabolic syndrome: a prospective study. *Int J*  
25  
26 *Epidemiol* 2009;38:848-54.  
27  
28  
29 24 Lim YC, Hoe VCW, Darius A, Bhoo-Pathy N. Association between night-shift work,  
30  
31 sleep quality and metabolic syndrome. *Occup Environ Med* 2018;75:716-723.  
32  
33  
34 25 Guo Y, Rong Y, Huang X et al. Shift work and the relationship with metabolic  
35  
36 syndrome in Chinese aged workers. *PLoS One* 2015;10:e0120632.  
37  
38  
39 26 Karlsson B, Knutsson A, Lindahl B. Is there an association between shift work and  
40  
41 having a metabolic syndrome? Results from a population based study of 27,485  
42  
43 people. *Occupational and Environmental Medicine* 2001;58:747-752.  
44  
45  
46 27 Xi B, He D, Zhang M, Xue J, Zhou D. Short sleep duration predicts risk of metabolic  
47  
48 syndrome: a systematic review and meta-analysis. *Sleep Med Rev* 2014;18:293-  
49  
50 7.  
51  
52  
53 28 Stamatakis KA, Punjabi NM. Effects of sleep fragmentation on glucose metabolism  
54  
55 in normal subjects. *Chest* 2010;137:95-101.  
56  
57  
58 29 Tasali E, Leproult R, Ehrmann DA, Van Cauter E. Slow-wave sleep and the risk of  
59  
60 type 2 diabetes in humans. *Proc Natl Acad Sci U S A* 2008;105:1044-9.

- 1  
2  
3 30 Esquirol Y, Bongard V, Mabile L, Jonnier B, Soulat JM, Perret B. Shift work and  
4 metabolic syndrome: respective impacts of job strain, physical activity, and dietary  
5 rhythms. *Chronobiol Int* 2009;26:544-59.  
6  
7  
8  
9  
10 31 de Assis MA, Kupek E, Nahas MV, Bellisle F. Food intake and circadian rhythms  
11 in shift workers with a high workload. *Appetite* 2003;40:175-83.  
12  
13  
14 32 Morikawa Y, Miura K, Sasaki S et al. Evaluation of the effects of shift work on  
15 nutrient intake: a cross-sectional study. *J Occup Health* 2008;50:270-8.  
16  
17  
18 33 Molzof HE, Wirth MD, Burch JB et al. The impact of meal timing on cardiometabolic  
19 syndrome indicators in shift workers. *Chronobiol Int* 2017;34:337-348.  
20  
21  
22  
23 34 Fonken LK, Workman JL, Walton JC et al. Light at night increases body mass by  
24 shifting the time of food intake. *Proc Natl Acad Sci U S A* 2010;107:18664-9.  
25  
26  
27 35 Fonken LK, Nelson RJ. The effects of light at night on circadian clocks and  
28 metabolism. *Endocr Rev* 2014;35:648-70.  
29  
30  
31  
32 36 Corbalan-Tutau D, Madrid JA, Nicolas F, Garaulet M. Daily profile in two circadian  
33 markers "melatonin and cortisol" and associations with metabolic syndrome  
34 components. *Physiol Behav* 2014;123:231-5.  
35  
36  
37  
38 37 Verhoog S, Gubelmann C, Guessous I, Bano A, Franco OH, Marques-Vidal P.  
39 Comparison of the Physical Activity Frequency Questionnaire (PAFQ) with  
40 accelerometry in a middle-aged and elderly population: The CoLaus study.  
41 *Maturitas* 2019;129:68-75.  
42  
43  
44 38 Ju SY, Jeong HS, Kim DH. Blood vitamin D status and metabolic syndrome in the  
45 general adult population: a dose-response meta-analysis. *J Clin Endocrinol Metab*  
46 2014;99:1053-63.  
47  
48  
49  
50 39 Parker J, Hashmi O, Dutton D et al. Levels of vitamin D and cardiometabolic  
51 disorders: systematic review and meta-analysis. *Maturitas* 2010;65:225-36.  
52  
53  
54  
55  
56  
57  
58  
59  
60

1  
2  
3 40 Sun M, Feng W, Wang F et al. Meta-analysis on shift work and risks of specific  
4  
5 obesity types. *Obes Rev* 2018;19:28-40.  
6  
7  
8  
9  
10  
11  
12  
13  
14  
15  
16  
17  
18  
19  
20  
21  
22  
23  
24  
25  
26  
27  
28  
29  
30  
31  
32  
33  
34  
35  
36  
37  
38  
39  
40  
41  
42  
43  
44  
45  
46  
47  
48  
49  
50  
51  
52  
53  
54  
55  
56  
57  
58  
59  
60

For peer review only

**Table 1.** Baseline characteristics according to work schedules

|                                               | Permanent day workers (n = 1905) | Day shift workers (n = 220) | Night shift workers (n = 134)    | Permanent night workers (n = 42) | p-value          | N Total |
|-----------------------------------------------|----------------------------------|-----------------------------|----------------------------------|----------------------------------|------------------|---------|
| <b>Demographics &amp; anthropometrics</b>     |                                  |                             |                                  |                                  |                  |         |
| Age (years)                                   | 55.0 (50.0–60.0)                 | 55.0 (50.5–59.5)            | 54.5 (50.4–58.6)                 | 53.0 (48.8–57.2)                 | 0.070            | 2275    |
| Men, n (%)                                    | 958 (50.3)                       | 89 (40.5) <sup>a</sup>      | 88 (65.7) <sup>a</sup>           | 18 (42.9)                        | <b>&lt;0.001</b> | 2301    |
| Educational level, n (%)                      |                                  |                             |                                  |                                  | <b>&lt;0.001</b> | 2300    |
| Low                                           | 791 (41.5)                       | 112 (50.9)                  | 71 (53.0)                        | 30 (71.4) <sup>a</sup>           |                  |         |
| High                                          | 591 (31.0) <sup>a</sup>          | 43 (19.5)                   | 23 (17.2)                        | 2 (4.8)                          |                  |         |
| Body-mass index (kg/m <sup>2</sup> )          | 25.4 (22.6–28.5)                 | 25.5 (23.1–27.6)            | 26.0 (23.2–30.0) <sup>b</sup>    | 27.9 (25.4–31.3) <sup>b,c</sup>  | <b>&lt;0.001</b> | 2228    |
| Waist circumference (cm)                      | 89.5 (81.0–98.5)                 | 89.0 (81.4–96.0)            | 93.0 (84.3–102.0) <sup>b,c</sup> | 95.0 (85.3–109.0) <sup>b,c</sup> | <b>&lt;0.001</b> | 2227    |
| Waist to hip ratio                            | 0.88 ± 0.09                      | 0.87 ± 0.08                 | 0.90 ± 0.09 <sup>b,c</sup>       | 0.90 ± 0.09                      | <b>0.013</b>     | 2227    |
| <b>Risk factors</b>                           |                                  |                             |                                  |                                  |                  |         |
| Metabolic syndrome, n (%)                     | 327 (17.2)                       | 25 (11.4)                   | 25 (18.7)                        | 17 (40.5) <sup>a</sup>           | <b>&lt;0.001</b> | 2301    |
| Number of metabolic risk factors <sup>†</sup> | 1 (0–2)                          | 1 (0–2)                     | 1 (0–2)                          | 2 (1–3) <sup>b,c</sup>           | <b>0.006</b>     | 2301    |
| Current major depressive disorder, n (%)      | 115 (7.9)                        | 19 (11.7)                   | 10 (9.6)                         | 4 (12.1)                         | 0.319            | 1756    |
| Hypertension, n (%)                           | 653 (34.9)                       | 80 (36.7)                   | 45 (33.6)                        | 12 (28.6)                        | 0.764            | 2263    |
| Diabetes, n (%)                               | 100 (5.4)                        | 8 (3.7)                     | 18 (13.6) <sup>a</sup>           | 4 (9.5)                          | <b>&lt;0.001</b> | 2231    |
| Dyslipidemia, n (%)                           | 413 (22.5)                       | 51 (23.6)                   | 29 (22.1)                        | 16 (38.1)                        | 0.123            | 2226    |
| Sleep drugs, n (%)                            | 109 (5.7)                        | 14 (6.4)                    | 4 (3.0)                          | 4 (9.5)                          | 0.367            | 2301    |
| Cardiovascular disease, n (%) <sup>††</sup>   | 55 (2.9)                         | 12 (5.5)                    | 5 (3.7)                          | 3 (7.1)                          | 0.102            | 2291    |
| <b>Risk factors</b>                           |                                  |                             |                                  |                                  |                  |         |
| Smoking status, n (%)                         |                                  |                             |                                  |                                  | <b>0.011</b>     | 2246    |
| Former                                        | 689 (37.0)                       | 86 (40.8)                   | 57 (43.8)                        | 9 (22.0) <sup>a</sup>            |                  |         |
| Current                                       | 404 (21.7)                       | 44 (20.9)                   | 22 (16.9)                        | 18 (43.9) <sup>a</sup>           |                  |         |

|                                      |                  |                  |                                 |                  |                  |      |
|--------------------------------------|------------------|------------------|---------------------------------|------------------|------------------|------|
| Alcohol (units/week)                 | 4 (1–9)          | 3 (0–7)          | 3 (0–7)                         | 2 (0–6)          | <b>0.010</b>     | 2162 |
| Coffee consumption, n (%)            |                  |                  |                                 |                  | 0.961            | 2222 |
| None                                 | 186 (10.1)       | 23 (11.0)        | 13 (10.2)                       | 4 (9.8)          |                  |      |
| 1–3 cups/day                         | 1154 (62.6)      | 134 (64.1)       | 78 (60.9)                       | 28 (68.3)        |                  |      |
| ≥4 cups/day                          | 504 (27.3)       | 52 (24.9)        | 37 (28.9)                       | 9 (22.0)         |                  |      |
| Total energy intake (Kcals/day)      | 1756 ± 664       | 1761 ± 654       | 1828 ± 719                      | 1853 ± 619       | 0.603            | 1996 |
| Physical activity                    |                  |                  |                                 |                  |                  |      |
| Total energy expenditure (Kcals/day) | 2656 (2297–3076) | 2698 (2336–3046) | 3118 (2735–3578) <sup>b,c</sup> | 2663 (2356–3164) | <b>&lt;0.001</b> | 1828 |
| Activity ≥4 MET (% total activity)   | 10.1 (1.9–18.4)  | 8.8 (1.2–20.2)   | 14.4 (4.9–25.3) <sup>b</sup>    | 6.5 (0.3–16.1)   | <b>0.005</b>     | 1828 |
| Sedentary status, n (%)              | 758 (49.2)       | 92 (55.1)        | 32 (34.4) <sup>a</sup>          | 16 (57.1)        | <b>0.011</b>     | 1828 |
| <b>Blood analysis</b>                |                  |                  |                                 |                  |                  |      |
| Total cholesterol (mmol/L)           | 5.3 ± 0.9        | 5.4 ± 0.9        | 5.3 ± 0.9                       | 5.4 ± 1.0        | 0.928            | 2226 |
| HDL cholesterol (mmol/L)             | 1.5 (1.2–1.9)    | 1.6 (1.3–1.9)    | 1.4 (1.2–1.8)                   | 1.4 (1.1–1.7)    | <b>0.013</b>     | 2226 |
| LDL cholesterol (mmol/L)             | 3.2 ± 0.8        | 3.2 ± 0.8        | 3.2 ± 0.8                       | 3.2 ± 0.9        | 0.958            | 2226 |
| Triglycerides (mmol/L)               | 1.0 (0.8–1.4)    | 1.0 (0.8–1.5)    | 1.1 (0.8–1.5)                   | 1.2 (0.9–1.8)    | 0.278            | 2226 |
| Fasting glucose (mmol/L)             | 5.2 (4.9–5.5)    | 5.1 (4.8–5.5)    | 5.2 (4.9–5.8)                   | 5.5 (5–5.9)      | <b>0.026</b>     | 2226 |
| Insulin (microlU/mL)                 | 7 (4.8–10.6)     | 7.2 (4.6–10.9)   | 7.3 (5.0–11.7)                  | 8.8 (6.5–12.9)   | <b>0.027</b>     | 2218 |
| HOMA-IR <sup>†††</sup>               | 1.6 (1.1–2.6)    | 1.6 (1.0–2.6)    | 1.7 (1.2–3.2)                   | 2.1 (1.5–3.4)    | <b>0.012</b>     | 2218 |

Data are presented as mean ± SD or median and interquartile range for continuous variables and number of participants (%) for categorical variables. P-value < 0.05 are shown in bold. <sup>a</sup> adjusted residual > | 2 |; <sup>b</sup> statistically different from "day only"; <sup>c</sup> statistically different from "shift work without night". † Metabolic risk factor corresponded to the five risk factors which defined the metabolic syndrome according to the Joint Interim Statement <sup>16</sup>: Systolic blood pressure ≥130 mmHg or diastolic blood pressure ≥85 mmHg or use of antihypertensive medication; waist circumference ≥88 cm in women or ≥102 cm in men); triglycerides ≥1.7 mmol/L, or use of fibrates or nicotinic acid; HDL-cholesterol <1.30 mmol/L in women or <1.03 mmol/L in men, or use of fibrates or nicotinic acid; and high fasting plasma glucose (≥5.6 mmol/L or use of anti-diabetic

medication). †† Cardiovascular disease was defined by previous stroke, heart attack, coronary artery bypass grafting or percutaneous coronary intervention. ††† Index of insulin resistance during fasting was assessed by the homeostatic model assessment of insulin resistance (HOMA-IR), calculated as the fasting insulin level (in milliunits per milliliter) times the fasting glucose level (in milligrams per liter) divided by 405.

HDL: high density lipoprotein; LDL: low density lipoprotein; MET: metabolic equivalent of task.

**Table 2.** Working and sleep characteristics according to work schedules

|                                                  | Permanent day<br>workers (n = 1905) | Day shift workers<br>(n = 220) | Night shift workers<br>(n = 134) | Permanent night<br>workers (n = 42) | p-value | N Total |
|--------------------------------------------------|-------------------------------------|--------------------------------|----------------------------------|-------------------------------------|---------|---------|
| <b>Working characteristics</b>                   |                                     |                                |                                  |                                     |         |         |
| Number of working hours/week                     | 38.0 ± 14.7                         | 38.7 ± 15.2                    | 43.1 ± 18.1                      | 38.0 ± 15.2                         | 0.260   | 2285    |
| Work time, n (%)                                 |                                     |                                |                                  |                                     | 0.397   | 2258    |
| Full-time                                        | 1569 (83.8)                         | 181 (84.6)                     | 111 (86.0)                       | 39 (92.9)                           |         |         |
| <50%                                             | 304 (16.2)                          | 33 (15.4)                      | 18 (14.0)                        | 3 (7.1)                             |         |         |
| Example of physical intensity at work, n (%)     |                                     |                                |                                  |                                     | <0.001  | 2135    |
| Sedentary (sitting/driving)                      | 1409 (79.5)                         | 105 (51.2)                     | 66 (55.0)                        | 14 (37.8)                           |         |         |
| Pushing wheelbarrow                              | 283 (16.0)                          | 81 (39.5)                      | 40 (33.3)                        | 16 (43.2)                           |         |         |
| Unloading a truck without assist.                | 81 (4.6)                            | 19 (9.3)                       | 14 (11.7)                        | 7 (18.9)                            |         |         |
| <b>Sleep &amp; vigilance</b>                     |                                     |                                |                                  |                                     |         |         |
| Epworth Sleepiness Scale score                   | 6 (4–8)                             | 5 (3–8)                        | 6 (4–9)                          | 5 (3–8)                             | 0.623   | 1786    |
| Excessive daytime sleepiness, n (%) <sup>†</sup> | 182 (12.1)                          | 20 (12.6)                      | 14 (14.0)                        | 3 (11.1)                            | 0.950   | 1786    |
| Poor sleep quality, n (%) <sup>††</sup>          | 415 (31.5)                          | 46 (37.4)                      | 27 (32.1)                        | 7 (35.0)                            | 0.600   | 1542    |
| High risk of SDB, n (%) <sup>§</sup>             | 321 (21.3)                          | 34 (21.0)                      | 29 (28.4)                        | 8 (27.6)                            | 0.323   | 1800    |
| Self-reported total sleep time (h)               | 6.9 ± 1.0                           | 6.8 ± 0.9                      | 6.9 ± 1.0                        | 7.1 ± 1.3                           | 0.507   | 1542    |



1  
2  
3 Data are presented as mean  $\pm$  SD or median and interquartile range for continuous variables and number of participants (%) for categorical variables. P-value  
4  
5 < 0.05 are shown in bold. † Excessive daytime sleepiness was defined by an Epworth Sleepiness Scale score >10; ‡ Poor sleep quality was defined by a  
6  
7 Pittsburgh Sleep Quality Index score >5; § High risk of SDB was defined by a Berlin score >2.  
8  
9  
10  
11  
12  
13  
14  
15  
16  
17  
18  
19  
20  
21  
22  
23  
24  
25  
26  
27  
28  
29  
30  
31  
32  
33  
34  
35  
36  
37  
38  
39  
40  
41  
42  
43  
44  
45  
46

For peer review only

**Table 3.** Prevalence of metabolic syndrome and its subcomponents according to work schedule

|                     | Permanent<br>day workers<br>(n = 1905) | Day shift<br>workers<br>(n = 220) | Night shift<br>workers<br>(n = 134) | Permanent<br>night workers<br>(n = 42) | p-value          |
|---------------------|----------------------------------------|-----------------------------------|-------------------------------------|----------------------------------------|------------------|
| Metabolic syndrome  |                                        |                                   |                                     |                                        |                  |
| Men                 | 226 (23.6)                             | 9 (10.1)                          | 17 (19.3)                           | 12 (66.7)                              | <b>&lt;0.001</b> |
| Women               | 101 (10.7)                             | 16 (12.2)                         | 8 (17.4)                            | 5 (20.8)                               | 0.225            |
| High BP             | 826 (43.4)                             | 91 (41.4)                         | 64 (47.8)                           | 23 (54.8)                              | 0.313            |
| High glucose        | 472 (24.8)                             | 50 (22.7)                         | 47 (35.1)                           | 16 (38.1)                              | <b>0.010</b>     |
| High triglycerides  |                                        |                                   |                                     |                                        |                  |
| Men                 | 243 (26.2)                             | 25 (29.1)                         | 18 (21.2)                           | 11 (61.1)                              | <b>0.006</b>     |
| Women               | 86 (9.5)                               | 16 (12.3)                         | 9 (19.6)                            | 3 (12.5)                               | 0.183            |
| Low HDL-cholesterol | 201 (10.9)                             | 19 (8.8)                          | 10 (7.6)                            | 9 (21.4)                               | 0.064            |
| Visceral obesity    |                                        |                                   |                                     |                                        |                  |
| Men                 | 220 (23.7)                             | 16 (18.6)                         | 23 (26.7)                           | 11 (61.1)                              | <b>0.002</b>     |
| Women               | 302 (33.3)                             | 55 (42.3)                         | 21 (45.7)                           | 11 (45.8)                              | 0.051            |

Data are presented as n (%).

Where there was an interaction of outcome\*sex, results are presented separately for men and women, otherwise for the whole cohort.

**Table 4.** Association of each component of the metabolic syndrome with work schedule

|                             | Crude             |              | Model 1           |              | Model 2           |              | Model 3           |              |
|-----------------------------|-------------------|--------------|-------------------|--------------|-------------------|--------------|-------------------|--------------|
|                             | OR (95% CI)       | p-value      | OR (95% CI)       | p-value      | OR (95% CI)       | p-value      | OR (95% CI)       | p-value      |
| <b>High BP</b>              | <i>n</i> = 2301   |              | <i>n</i> = 2274   |              | <i>n</i> = 2066   |              | <i>n</i> = 1731   |              |
| Day shift-workers           | 0.92 (0.69-1.22)  | 0.572        | 1.05 (0.78-1.42)  | 0.746        | 1.02 (0.73-1.42)  | 0.907        | 1.06 (0.73-1.54)  | 0.757        |
| Night shift-workers         | 1.19 (0.84-1.70)  | 0.321        | 1.02 (0.70-1.49)  | 0.912        | 0.92 (0.61-1.39)  | 0.682        | 1.01 (0.62-1.63)  | 0.983        |
| Permanent night workers     | 1.58 (0.86-2.92)  | 0.144        | 1.78 (0.93-3.41)  | 0.081        | 1.60 (0.77-3.31)  | 0.204        | 1.90 (0.79-4.58)  | 0.155        |
| <b>High fasting glucose</b> | <i>n</i> = 2301   |              | <i>n</i> = 2274   |              | <i>n</i> = 2066   |              | <i>n</i> = 1731   |              |
| Day shift-workers           | 0.89 (0.64-1.25)  | 0.504        | 1.05 (0.74-1.50)  | 0.776        | 1.07 (0.73-1.58)  | 0.735        | 1.04 (0.66-1.63)  | 0.883        |
| Night shift-workers         | 1.64 (1.13-2.37)  | <b>0.009</b> | 1.36 (0.91-2.02)  | 0.135        | 1.44 (0.93-2.24)  | 0.106        | 1.26 (0.74-2.14)  | 0.389        |
| Permanent night workers     | 1.87 (0.99-3.51)  | 0.052        | 2.14 (1.07-4.29)  | <b>0.031</b> | 1.70 (0.79-3.64)  | 0.173        | 1.31 (0.52-3.29)  | 0.572        |
| <b>High triglycerides</b>   |                   |              |                   |              |                   |              |                   |              |
| <i>Men</i>                  | <i>n</i> = 1117   |              | <i>n</i> = 1116   |              | <i>n</i> = 1038   |              | <i>n</i> = 886    |              |
| Day shift-workers           | 1.16 (0.71-1.88)  | 0.562        | 1.14 (0.70-1.87)  | 0.593        | 1.30 (0.77-2.19)  | 0.324        | 1.32 (0.73-2.40)  | 0.360        |
| Night shift-workers         | 0.76 (0.44-1.30)  | 0.313        | 0.74 (0.43-1.28)  | 0.287        | 0.86 (0.49-1.52)  | 0.604        | 0.97 (0.52-1.84)  | 0.936        |
| Permanent night workers     | 4.43 (1.70-11.56) | <b>0.002</b> | 4.31 (1.64-11.30) | <b>0.003</b> | 3.50 (1.19-10.26) | <b>0.023</b> | 3.27 (0.99-10.77) | 0.051        |
| <i>Women</i>                | <i>n</i> = 1109   |              | <i>n</i> = 1105   |              | <i>n</i> = 1020   |              | <i>n</i> = 837    |              |
| Day shift-workers           | 1.34 (0.76-2.37)  | 0.309        | 1.34 (0.75-2.38)  | 0.320        | 1.19 (0.63-2.24)  | 0.594        | 0.92 (0.41-2.03)  | 0.828        |
| Night shift-workers         | 2.33 (1.09-4.99)  | <b>0.030</b> | 2.29 (1.06-4.95)  | <b>0.035</b> | 2.65 (1.14-6.15)  | <b>0.023</b> | 2.92 (1.03-8.27)  | <b>0.044</b> |
| Permanent night workers     | 1.37 (0.40-4.68)  | 0.618        | 1.36 (0.39-4.73)  | 0.625        | 1.09 (0.30-3.97)  | 0.899        | 0.53 (0.06-4.32)  | 0.549        |
| <b>Low HDL-cholesterol</b>  | <i>n</i> = 2226   |              | <i>n</i> = 2221   |              | <i>n</i> = 2058   |              | <i>n</i> = 1723   |              |
| Day shift-workers           | 0.79 (0.50-1.29)  | 0.336        | 0.75 (0.46-1.23)  | 0.255        | 0.62 (0.28-1.40)  | 0.252        | 0.74 (0.39-1.39)  | 0.348        |

|                         |                   |              |                   |              |                   |              |                   |              |
|-------------------------|-------------------|--------------|-------------------|--------------|-------------------|--------------|-------------------|--------------|
| Night shift-workers     | 0.67 (0.35-1.30)  | 0.240        | 0.60 (0.31-1.18)  | 0.138        | 0.58 (0.29-1.15)  | 0.116        | 0.66 (0.30-1.45)  | 0.300        |
| Permanent night workers | 2.22 (1.05-4.71)  | <b>0.038</b> | 1.90 (0.89-4.08)  | 0.099        | 1.61 (0.71-3.64)  | 0.252        | 1.47 (0.52-4.18)  | 0.468        |
| <b>Visceral obesity</b> |                   |              |                   |              |                   |              |                   |              |
| <i>Men</i>              | <i>n</i> = 1119   |              | <i>n</i> = 1118   |              | <i>n</i> = 1043   |              | <i>n</i> = 890    |              |
| Day shift-workers       | 0.74 (0.42-1.29)  | 0.288        | 0.75 (0.42-1.34)  | 0.333        | 0.84 (0.47-1.51)  | 0.561        | 0.72 (0.36-1.42)  | 0.341        |
| Night shift-workers     | 1.18 (0.71-1.94)  | 0.525        | 1.11 (0.66-1.84)  | 0.704        | 1.06 (0.61-1.85)  | 0.257        | 0.84 (0.44-1.63)  | 0.612        |
| Permanent night workers | 5.06 (1.94-13.22) | <b>0.001</b> | 5.27 (1.99-13.98) | <b>0.001</b> | 4.79 (1.64-14.03) | <b>0.004</b> | 3.35 (1.04-10.76) | <b>0.042</b> |
| <i>Women</i>            | <i>n</i> = 1108   |              | <i>n</i> = 1104   |              | <i>n</i> = 1022   |              | <i>n</i> = 839    |              |
| Day shift-workers       | 1.47 (1.01-2.14)  | <b>0.043</b> | 1.48 (1.01-2.17)  | <b>0.043</b> | 1.31 (0.87-1.97)  | 0.194        | 1.05 (0.65-1.70)  | 0.852        |
| Night shift-workers     | 1.70 (0.93-3.06)  | 0.086        | 1.79 (0.98-3.29)  | 0.059        | 1.91 (1.01-3.62)  | <b>0.047</b> | 1.51 (0.66-3.10)  | 0.324        |
| Permanent night workers | 1.70 (0.75-3.84)  | 0.203        | 1.69 (0.73-3.92)  | 0.219        | 1.75 (0.72-4.23)  | 0.217        | 0.83 (0.23-2.99)  | 0.971        |

Data are presented as odds ratio (OR) and 95% confidence intervals (CI). For each component analyzed, the “permanent day workers” were considered as the reference group. *p*-values <0.05 are in bold. Model 1 was adjusted for age (continuous), age square (continuous), sex (except for sex subanalysis) and educational level (middle, low, high). Model 2 was additionally adjusted for weekly alcohol consumption (continuous), smoking status (never, former, current) and for BMI (normal weight, overweight, obese) (except for visceral obesity). Model 3 was additionally adjusted for daily total energy expenditure (continuous).

## FIGURE LEGENDS

**Figure 1.** Multivariable-adjusted risk of metabolic syndrome according to work schedule and sex.

Data are presented on a logarithmic scale and were analyzed using multivariable logistic regression with adjustment for age, educational level, weekly alcohol consumption, smoking status and daily total energy expenditure (Model 3).

For peer review only

1  
2  
3  
4  
5  
6  
7  
8  
9  
10  
11  
12  
13  
14  
15  
16  
17  
18  
19  
20  
21  
22  
23  
24  
25  
26  
27  
28  
29  
30  
31  
32  
33  
34  
35  
36  
37  
38  
39  
40  
41  
42  
43  
44  
45  
46  
47  
48  
49  
50  
51  
52  
53  
54  
55  
56  
57  
58  
59  
60

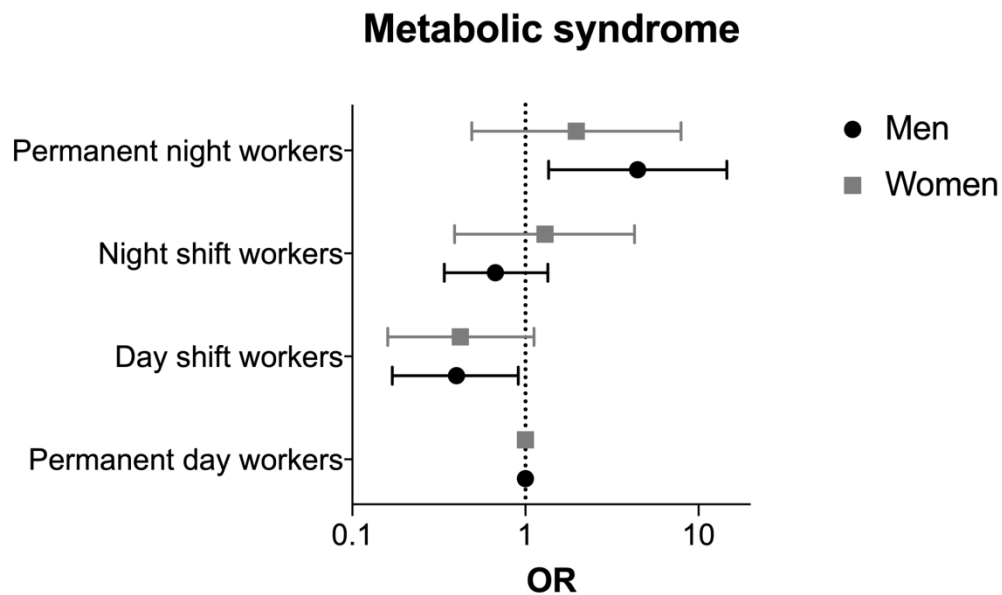

Figure 1. Multivariable-adjusted risk of metabolic syndrome according to work schedule and sex. Data are presented on a logarithmic scale and were analyzed using multivariable logistic regression with adjustment for age, educational level, weekly alcohol consumption, smoking status and daily total energy expenditure (Model 3).

177x109mm (300 x 300 DPI)

## SUPPLEMENTAL MATERIAL

### Impact of night and shift work on metabolic syndrome and its components in an active middle-aged population-based sample

Virginie Bayon,<sup>1,\*</sup> Mathieu Berger,<sup>1,\*</sup> Geoffroy Solelhac,<sup>1</sup> José Haba-Rubio,<sup>1</sup> Pedro Marques-Vidal,<sup>2</sup> Marie-Pierre Strippoli,<sup>3</sup> Martin Preisig,<sup>3</sup> Damien Leger,<sup>4,5</sup> Raphael Heinzer<sup>1</sup>

<sup>1</sup>Center for Investigation and Research in Sleep (CIRS), Lausanne University Hospital (CHUV) and University of Lausanne, Lausanne, Switzerland; <sup>2</sup>Department of Medicine, Internal Medicine, Lausanne University Hospital (CHUV) and University of Lausanne, Lausanne, Switzerland; <sup>3</sup>Department of Psychiatry, Lausanne University Hospital (CHUV) and University of Lausanne, Lausanne, Switzerland; <sup>4</sup>Université de Paris, VIFASOM (Equipe d'accueil 5330 Vigilance FATigue SOMmeil et Santé Publique), Paris, France ; <sup>5</sup>APHP, Hôtel Dieu, Centre du Sommeil et de la Vigilance, Paris, France.

#### Online Data Supplement:

- **1 Supplementary Figure**
- **1 Supplementary Table**

**Supplementary Figure 1. Study flowchart**

FU: Follow-up





**Supplementary Table 1.** Association of metabolic syndrome with working schedule

|                         | Crude             |                  | Model 1           |              | Model 2           |              |
|-------------------------|-------------------|------------------|-------------------|--------------|-------------------|--------------|
|                         | N (%)             | p-value          | OR (95% CI)       | p-value      | OR (95% CI)       | p-value      |
| <b>Men</b>              | <i>n</i> = 1153   |                  | <i>n</i> = 1059   |              | <i>n</i> = 847    |              |
| Permanent day workers   | Ref               | -                | Ref               | -            | Ref               | -            |
| Day shift-workers       | 0.36 (0.18-0.74)  | <b>0.005</b>     | 0.33 (0.15-0.69)  | <b>0.004</b> | 0.38 (0.17-0.87)  | <b>0.022</b> |
| Night shift-workers     | 0.78 (0.45-1.34)  | 0.365            | 0.71 (0.40-1.26)  | 0.238        | 0.67 (0.33-1.36)  | 0.266        |
| Permanent night workers | 6.48 (2.40-17.46) | <b>&lt;0.001</b> | 6.00 (2.14-16.80) | <b>0.001</b> | 4.37 (1.33-14.38) | <b>0.015</b> |
| <b>Women</b>            | <i>n</i> = 1148   |                  | <i>n</i> = 1048   |              | <i>n</i> = 798    |              |
| Permanent day workers   | Ref               | -                | Ref               | -            | Ref               | -            |
| Day shift-workers       | 1.17 (0.66-2.05)  | 0.594            | 1.15 (0.62-2.12)  | 0.653        | 0.47 (0.17-1.24)  | 0.929        |
| Night shift-workers     | 1.76 (0.80-3.89)  | 0.159            | 1.96 (0.86-4.46)  | 0.107        | 1.38 (0.42-4.57)  | 0.596        |
| Permanent night workers | 2.20 (0.81-6.03)  | 0.124            | 1.84 (0.60-5.64)  | 0.289        | 1.43 (0.28-7.19)  | 0.668        |

p-values <0.05 are in bold.

Model 1 was adjusted for age (continuous), age square (continuous) and educational level (middle, low, high). Model 2 was additionally adjusted for weekly alcohol consumption (continuous), smoking status (never, former, current) and daily total energy expenditure.

## STROBE Statement—checklist of items that should be included in reports of observational studies

|                              | Item No | Recommendation                                                                                                                                                                                                                                                                                                                                                                                                                                                                                                                                                                                                                                                                                   | Page number              |
|------------------------------|---------|--------------------------------------------------------------------------------------------------------------------------------------------------------------------------------------------------------------------------------------------------------------------------------------------------------------------------------------------------------------------------------------------------------------------------------------------------------------------------------------------------------------------------------------------------------------------------------------------------------------------------------------------------------------------------------------------------|--------------------------|
| <b>Title and abstract</b>    | 1       | (a) Indicate the study's design with a commonly used term in the title or the abstract<br>(b) Provide in the abstract an informative and balanced summary of what was done and what was found                                                                                                                                                                                                                                                                                                                                                                                                                                                                                                    | 1, 4<br>4                |
| <b>Introduction</b>          |         |                                                                                                                                                                                                                                                                                                                                                                                                                                                                                                                                                                                                                                                                                                  |                          |
| Background/rationale         | 2       | Explain the scientific background and rationale for the investigation being reported                                                                                                                                                                                                                                                                                                                                                                                                                                                                                                                                                                                                             | 5, 6                     |
| Objectives                   | 3       | State specific objectives, including any prespecified hypotheses                                                                                                                                                                                                                                                                                                                                                                                                                                                                                                                                                                                                                                 | 6                        |
| <b>Methods</b>               |         |                                                                                                                                                                                                                                                                                                                                                                                                                                                                                                                                                                                                                                                                                                  |                          |
| Study design                 | 4       | Present key elements of study design early in the paper                                                                                                                                                                                                                                                                                                                                                                                                                                                                                                                                                                                                                                          | 6, 7                     |
| Setting                      | 5       | Describe the setting, locations, and relevant dates, including periods of recruitment, exposure, follow-up, and data collection                                                                                                                                                                                                                                                                                                                                                                                                                                                                                                                                                                  | 6, 7                     |
| Participants                 | 6       | (a) <i>Cohort study</i> —Give the eligibility criteria, and the sources and methods of selection of participants. Describe methods of follow-up<br><i>Case-control study</i> —Give the eligibility criteria, and the sources and methods of case ascertainment and control selection. Give the rationale for the choice of cases and controls<br><i>Cross-sectional study</i> —Give the eligibility criteria, and the sources and methods of selection of participants<br>(b) <i>Cohort study</i> —For matched studies, give matching criteria and number of exposed and unexposed<br><i>Case-control study</i> —For matched studies, give matching criteria and the number of controls per case | 6, 7<br>6, 7             |
| Variables                    | 7       | Clearly define all outcomes, exposures, predictors, potential confounders, and effect modifiers. Give diagnostic criteria, if applicable                                                                                                                                                                                                                                                                                                                                                                                                                                                                                                                                                         | 7, 8                     |
| Data sources/<br>measurement | 8*      | For each variable of interest, give sources of data and details of methods of assessment (measurement). Describe comparability of assessment methods if there is more than one group                                                                                                                                                                                                                                                                                                                                                                                                                                                                                                             | 7, 8                     |
| Bias                         | 9       | Describe any efforts to address potential sources of bias                                                                                                                                                                                                                                                                                                                                                                                                                                                                                                                                                                                                                                        | 9, 10                    |
| Study size                   | 10      | Explain how the study size was arrived at                                                                                                                                                                                                                                                                                                                                                                                                                                                                                                                                                                                                                                                        | 7                        |
| Quantitative variables       | 11      | Explain how quantitative variables were handled in the analyses. If applicable, describe which groupings were chosen and why                                                                                                                                                                                                                                                                                                                                                                                                                                                                                                                                                                     | 9, 10                    |
| Statistical methods          | 12      | (a) Describe all statistical methods, including those used to control for confounding<br>(b) Describe any methods used to examine subgroups and interactions<br>(c) Explain how missing data were addressed<br>(d) <i>Cohort study</i> —If applicable, explain how loss to follow-up was addressed<br><i>Case-control study</i> —If applicable, explain how matching of cases and controls was addressed<br><i>Cross-sectional study</i> —If applicable, describe analytical methods taking account of sampling strategy<br>(e) Describe any sensitivity analyses                                                                                                                                | 9, 10,<br>11<br>10<br>10 |

Continued on next page

1  
2  
3  
4  
5  
6  
7  
8  
9  
10  
11  
12  
13  
14  
15  
16  
17  
18  
19  
20  
21  
22  
23  
24  
25  
26  
27  
28  
29  
30  
31  
32  
33  
34  
35  
36  
37  
38  
39  
40  
41  
42  
43  
44  
45  
46  
47  
48  
49  
50  
51  
52  
53  
54  
55  
56  
57  
58  
59  
60

| <b>Results</b>           |     |                                                                                                                                                                                                              |                            |
|--------------------------|-----|--------------------------------------------------------------------------------------------------------------------------------------------------------------------------------------------------------------|----------------------------|
| Participants             | 13* | (a) Report numbers of individuals at each stage of study—eg numbers potentially eligible, examined for eligibility, confirmed eligible, included in the study, completing follow-up, and analysed            | Fig. S1<br>10              |
|                          |     | (b) Give reasons for non-participation at each stage                                                                                                                                                         | Fig. S1                    |
|                          |     | (c) Consider use of a flow diagram                                                                                                                                                                           | Fig. S1                    |
| Descriptive data         | 14* | (a) Give characteristics of study participants (eg demographic, clinical, social) and information on exposures and potential confounders                                                                     | 11                         |
|                          |     | (b) Indicate number of participants with missing data for each variable of interest                                                                                                                          | Table 1                    |
|                          |     | (c) <i>Cohort study</i> —Summarise follow-up time (eg, average and total amount)                                                                                                                             |                            |
| Outcome data             | 15* | <i>Cohort study</i> —Report numbers of outcome events or summary measures over time                                                                                                                          |                            |
|                          |     | <i>Case-control study</i> —Report numbers in each exposure category, or summary measures of exposure                                                                                                         |                            |
|                          |     | <i>Cross-sectional study</i> —Report numbers of outcome events or summary measures                                                                                                                           | 11,<br>12                  |
| Main results             | 16  | (a) Give unadjusted estimates and, if applicable, confounder-adjusted estimates and their precision (eg, 95% confidence interval). Make clear which confounders were adjusted for and why they were included | 12,<br>Fig. 1,<br>Table S1 |
|                          |     | (b) Report category boundaries when continuous variables were categorized                                                                                                                                    |                            |
|                          |     | (c) If relevant, consider translating estimates of relative risk into absolute risk for a meaningful time period                                                                                             |                            |
| Other analyses           | 17  | Report other analyses done—eg analyses of subgroups and interactions, and sensitivity analyses                                                                                                               | 12,<br>13,<br>Table 3      |
| <b>Discussion</b>        |     |                                                                                                                                                                                                              |                            |
| Key results              | 18  | Summarise key results with reference to study objectives                                                                                                                                                     | 13                         |
| Limitations              | 19  | Discuss limitations of the study, taking into account sources of potential bias or imprecision. Discuss both direction and magnitude of any potential bias                                                   | 16                         |
| Interpretation           | 20  | Give a cautious overall interpretation of results considering objectives, limitations, multiplicity of analyses, results from similar studies, and other relevant evidence                                   | 16,<br>17                  |
| Generalisability         | 21  | Discuss the generalisability (external validity) of the study results                                                                                                                                        | 16,<br>17                  |
| <b>Other information</b> |     |                                                                                                                                                                                                              |                            |
| Funding                  | 22  | Give the source of funding and the role of the funders for the present study and, if applicable, for the original study on which the present article is based                                                | 18                         |

\*Give information separately for cases and controls in case-control studies and, if applicable, for exposed and unexposed groups in cohort and cross-sectional studies.

**Note:** An Explanation and Elaboration article discusses each checklist item and gives methodological background and published examples of transparent reporting. The STROBE checklist is best used in conjunction with this article (freely

1  
2 available on the Web sites of PLoS Medicine at <http://www.plosmedicine.org/>, Annals of Internal Medicine at  
3 <http://www.annals.org/>, and Epidemiology at <http://www.epidem.com/>). Information on the STROBE Initiative is  
4 available at [www.strobe-statement.org](http://www.strobe-statement.org).  
5  
6  
7  
8  
9  
10  
11  
12  
13  
14  
15  
16  
17  
18  
19  
20  
21  
22  
23  
24  
25  
26  
27  
28  
29  
30  
31  
32  
33  
34  
35  
36  
37  
38  
39  
40  
41  
42  
43  
44  
45  
46  
47  
48  
49  
50  
51  
52  
53  
54  
55  
56  
57  
58  
59  
60

For peer review only

# BMJ Open

## Impact of night and shift work on metabolic syndrome and its components: A cross-sectional study in an active middle-to-older-aged population-based sample

|                                 |                                                                                                                                                                                                                                                                                                                                                                                                                                                                                                                                                                                                                                                                                                                                                                                   |
|---------------------------------|-----------------------------------------------------------------------------------------------------------------------------------------------------------------------------------------------------------------------------------------------------------------------------------------------------------------------------------------------------------------------------------------------------------------------------------------------------------------------------------------------------------------------------------------------------------------------------------------------------------------------------------------------------------------------------------------------------------------------------------------------------------------------------------|
| Journal:                        | <i>BMJ Open</i>                                                                                                                                                                                                                                                                                                                                                                                                                                                                                                                                                                                                                                                                                                                                                                   |
| Manuscript ID                   | bmjopen-2021-053591.R2                                                                                                                                                                                                                                                                                                                                                                                                                                                                                                                                                                                                                                                                                                                                                            |
| Article Type:                   | Original research                                                                                                                                                                                                                                                                                                                                                                                                                                                                                                                                                                                                                                                                                                                                                                 |
| Date Submitted by the Author:   | 07-Dec-2021                                                                                                                                                                                                                                                                                                                                                                                                                                                                                                                                                                                                                                                                                                                                                                       |
| Complete List of Authors:       | Bayon, Virginie; CHUV) and University of Lausanne<br>Berger, Mathieu; CHUV, Center for Investigation and Research in Sleep<br>Solelhac, Geoffroy; CHUV) and University of Lausanne<br>Haba-Rubio, José; CHUV) and University of Lausanne<br>Marques-Vidal, Pedro; CHUV) and University of Lausanne, Department of<br>Medicine, Internal Medicine<br>Strippoli, Marie-Pierre; CHUV) and University of Lausanne, Department<br>of Psychiatry<br>Preisig, Martin; CHUV) and University of Lausanne, Department of<br>Psychiatry<br>Leger, Damien; Centre du sommeil et de la vigilance, Hôtel Dieu, APHP;<br>Université Paris Descartes, Sorbonne paris Cité, EA 7330 VIFASOM,<br>Sommeil-Vigilance-Fatigue et Santé Publique,<br>Heinzer, Raphael; CHUV) and University of Lausanne |
| <b>Primary Subject Heading</b>: | Epidemiology                                                                                                                                                                                                                                                                                                                                                                                                                                                                                                                                                                                                                                                                                                                                                                      |
| Secondary Subject Heading:      | Diabetes and endocrinology, Occupational and environmental medicine                                                                                                                                                                                                                                                                                                                                                                                                                                                                                                                                                                                                                                                                                                               |
| Keywords:                       | General endocrinology < DIABETES & ENDOCRINOLOGY,<br>EPIDEMIOLOGY, Diabetes & endocrinology < INTERNAL MEDICINE                                                                                                                                                                                                                                                                                                                                                                                                                                                                                                                                                                                                                                                                   |
|                                 |                                                                                                                                                                                                                                                                                                                                                                                                                                                                                                                                                                                                                                                                                                                                                                                   |

SCHOLARONE™  
Manuscripts



I, the Submitting Author has the right to grant and does grant on behalf of all authors of the Work (as defined in the below author licence), an exclusive licence and/or a non-exclusive licence for contributions from authors who are: i) UK Crown employees; ii) where BMJ has agreed a CC-BY licence shall apply, and/or iii) in accordance with the terms applicable for US Federal Government officers or employees acting as part of their official duties; on a worldwide, perpetual, irrevocable, royalty-free basis to BMJ Publishing Group Ltd ("BMJ") its licensees and where the relevant Journal is co-owned by BMJ to the co-owners of the Journal, to publish the Work in this journal and any other BMJ products and to exploit all rights, as set out in our [licence](#).

The Submitting Author accepts and understands that any supply made under these terms is made by BMJ to the Submitting Author unless you are acting as an employee on behalf of your employer or a postgraduate student of an affiliated institution which is paying any applicable article publishing charge ("APC") for Open Access articles. Where the Submitting Author wishes to make the Work available on an Open Access basis (and intends to pay the relevant APC), the terms of reuse of such Open Access shall be governed by a Creative Commons licence – details of these licences and which [Creative Commons](#) licence will apply to this Work are set out in our licence referred to above.

Other than as permitted in any relevant BMJ Author's Self Archiving Policies, I confirm this Work has not been accepted for publication elsewhere, is not being considered for publication elsewhere and does not duplicate material already published. I confirm all authors consent to publication of this Work and authorise the granting of this licence.

1  
2  
3 **Impact of night and shift work on metabolic syndrome and its components: A**  
4 **cross-sectional study in an active middle-to-older-aged population-based**  
5 **sample**  
6  
7  
8  
9

10  
11  
12 **Short title:** Impact of night and shift work  
13  
14

15  
16  
17 Virginie Bayon, MD<sup>1,\*</sup> Mathieu Berger, PhD<sup>1,\*</sup> Geoffroy Solelhac, MD<sup>1</sup> José Haba-  
18 Rubio, MD<sup>1</sup> Pedro Marques-Vidal, MD<sup>2</sup> Marie-Pierre F. Strippoli, MSc<sup>3</sup> Martin  
19 Preisig, MD<sup>3</sup> Damien Leger, MD<sup>4,5</sup> Raphael Heinzer, MD<sup>1</sup>  
20  
21  
22  
23

24  
25  
26 <sup>1</sup>Center for Investigation and Research in Sleep (CIRS), Lausanne University  
27 Hospital (CHUV) and University of Lausanne, Lausanne, Switzerland; <sup>2</sup>Department of  
28 Medicine, Internal Medicine, Lausanne University Hospital (CHUV) and University of  
29 Lausanne, Lausanne, Switzerland; <sup>3</sup>Department of Psychiatry, Lausanne University  
30 Hospital (CHUV) and University of Lausanne, Lausanne, Switzerland; <sup>4</sup>Université de  
31 Paris, VIFASOM (Equipe d'accueil 5330 Vigilance FATigue SOMmeil et Santé  
32 Publique), Paris, France ; <sup>5</sup>APHP, Hôtel Dieu, Centre du Sommeil et de la Vigilance,  
33 Paris, France  
34  
35  
36  
37  
38  
39  
40  
41  
42  
43  
44  
45

46 \*these authors contributed equally to this work  
47  
48  
49

50  
51 **Corresponding Author:** Mathieu Berger, PhD, Center for Investigation and  
52 Research in Sleep (CIRS), Lausanne University Hospital (CHUV), Rue du Bugnon  
53 46, 1011 Lausanne, Switzerland. Tel: +41 21 314 86 45. E-mail:  
54  
55  
56  
57 *mathieuberger@outlook.com*  
58  
59  
60

1  
2  
3  
4  
5  
6  
7  
8  
9  
10  
11  
12  
13  
14  
15  
16  
17  
18  
19  
20  
21  
22  
23  
24  
25  
26  
27  
28  
29  
30  
31  
32  
33  
34  
35  
36  
37  
38  
39  
40  
41  
42  
43  
44  
45  
46  
47  
48  
49  
50  
51  
52  
53  
54  
55  
56  
57  
58  
59  
60

**Total word count (main text only): 3508**

**Number of Tables/Figures: 4/1**

For peer review only



## ABSTRACT

**Objectives** To examine the effects of work schedules on metabolic syndrome and its components in active middle-to-older-aged workers.

**Methods** A cross-sectional analysis including middle-to-older-aged active workers from the population-based CoLaus|PsyCoLaus study (Lausanne, Switzerland) was performed. Work schedule was self-reported and defined as follows: permanent day, day shift, night shift, and permanent night work. Associations between work schedule and the risk of metabolic syndrome and its components were analyzed using multivariable-adjusted logistic regressions.

**Results** A total of 2301 active workers (median age [interquartile range]: 55.4 [50.8-60.4], 50.1% women) were included. Of these, 1905 were permanent day workers, 220 were day shift workers, 134 were night shift workers and 42 were permanent night shift workers. There were significant interactions between sex and work schedule for metabolic syndrome, high triglycerides and visceral obesity. Men but not women permanent night workers had a higher prevalence of metabolic syndrome than permanent day workers in multivariable-adjusted analyses (OR 4.45 [95% CI 1.36-14.56]). Analysis of metabolic syndrome subcomponents showed that the association between work schedule and metabolic syndrome in men was mainly driven by visceral obesity (OR 3.35 [95% CI 1.04-10.76]). Conversely, women but not men working in night shift were at increased risk of having high triglycerides compared with permanent day workers (OR 2.92 [95% CI 1.03-8.27]).

**Conclusions** The risk of metabolic syndrome is higher in men working in permanent night shift compared with permanent day work and this association could be mediated by visceral obesity.

**Keywords** work schedule, abdominal obesity, risk factors

## STRENGTHS AND LIMITATIONS OF THIS STUDY

- This study evaluated the effects of work schedules on metabolic syndrome and its subcomponent in a middle-to-older-aged general population setting with a precise and extensive assessment of cardio-metabolic phenotypes.
- The association between different shift work schedules and metabolic syndrome was assessed after adjustment for multiple cofounders.
- Because the primary aim of the cohort was not to evaluate the impact of shift work, no precise characterization of workstations and work rhythms (hourly amplitude, direction of rotation, duration of rotations, and duration of exposition) was performed.
- A “healthy worker effect” with a selection of “night shift tolerant” workers cannot be ruled out given the older age of our sample.

## Introduction

Due to economic constraints, efficiency needs or performance objectives, night and shift work (3x8) has become highly prevalent in modern societies. Approximately 18% of all European workers work shifts, and this rate is as high as 35% in some countries<sup>1</sup>. Non-standard working schedules (e.g. shift work, night work) are no longer limited to health and safety workers, but are spread across all industries and services, from manufacturing, to transport, telecommunications and more.

Night and shift work interfere with the physiological circadian rhythm, desynchronizing the biological clock, which can favor systemic inflammation<sup>2</sup>. Night and shift work are also associated with reduced and disturbed sleep<sup>3</sup>. Hence, both circadian disruption and short or poor sleep could be mediators explaining the relationship between night or shift work and chronic health conditions, including increased risk of cardiovascular and metabolic disorders<sup>4</sup>. Moreover, several laboratory-controlled studies showed that circadian rhythm desynchronization and sleep restriction have detrimental effects on neuroendocrine, inflammatory and immune functions<sup>5</sup>.

The health-related impact of atypical work schedules has thus been a topic of interest for some time<sup>6</sup>. Sleep disturbances, decreased vigilance and increased risk of accidents are among the recognized short-term negative effects of night and shift work<sup>7</sup>. Longer-term health effects have also been described, and include increased risk of cardiovascular and metabolic disorders<sup>8 9</sup>. However, the impact of shift work on metabolic syndrome is not yet completely understood, particularly in the middle-to-older-aged population of workers though it is well established that the cardiometabolic risk gradually increases with advancing age.

1  
2  
3 Metabolic syndrome combines several interrelated metabolic risk factors associated  
4 with all-cause mortality<sup>10</sup>. Subjects with metabolic syndrome have a higher risk of  
5 cardiovascular disease mortality and morbidity<sup>11</sup>. Metabolic syndrome definition is  
6 based on five components: high blood pressure (BP), hyperglycemia, high  
7 triglycerides, low high-density lipoprotein (HDL) cholesterol and visceral obesity. A  
8 higher prevalence of metabolic syndrome and its components among night and shift  
9 workers has previously been suggested in some studies<sup>12 13</sup>. However, the specific  
10 effect of shift work and permanent night work remains largely unknown. Moreover, a  
11 recent systematic review concluded that there was insufficient evidence regarding  
12 the association between shift work and metabolic syndrome when confounding  
13 variables are taken into account<sup>14</sup>.

14 Thus, using data of active middle-to-older aged workers from a population-based  
15 study, the aim of the present paper was to assess the cross-sectional association  
16 between metabolic syndrome and its components according to four types of work  
17 schedules (permanent day, day shift, night shift and permanent night shift work).

## 38 **Methods**

39 **Study design** cross-sectional analysis of a population-based cohort study.

40  
41  
42  
43  
44  
45  
46  
47 **Population** CoLaus|PsyCoLaus is a population-based cohort exploring the  
48 biological, genetic, and environmental determinants of cardiovascular risk factors,  
49 cardiovascular diseases, and mental disorders in the middle-to-older-aged population  
50 of Lausanne, Switzerland. The methodological aspects (participant recruitment and  
51 follow-up) have been previously reported<sup>15</sup>. Briefly, a simple, non-stratified, random  
52 sample of 6,734 subjects from the Lausanne population aged 35-75 years was  
53  
54  
55  
56  
57  
58  
59  
60

1  
2  
3 recruited between 2003 and 2006. The baseline and three follow-up evaluations  
4 included physical and psychiatric exams, blood sampling, and self-completed  
5 questionnaires. All data analyzed in the present paper were obtained from the  
6  
7  
8  
9  
10 second physical follow-up evaluation ( $n = 4881$ ), which took place between 2014 and  
11  
12  
13  
14  
15  
16  
17  
18  
19  
20  
21  
22  
23  
24  
25  
26  
27  
28  
29  
30  
31  
32  
33  
34  
35  
36  
37  
38  
39  
40  
41  
42  
43  
44  
45  
46  
47  
48  
49  
50  
51  
52  
53  
54  
55  
56  
57  
58  
59  
60

recruited between 2003 and 2006. The baseline and three follow-up evaluations included physical and psychiatric exams, blood sampling, and self-completed questionnaires. All data analyzed in the present paper were obtained from the second physical follow-up evaluation ( $n = 4881$ ), which took place between 2014 and 2017. The study was approved by the Institutional Ethics Committee of the University of Lausanne (decision reference 33/09) and written inform consent was obtained from all subjects.

### **Patient and Public Involvement**

No patients or public were involved in this study design, conduct or analysis.

**Exposure and eligibility criteria** Professional activity and working hours were self-reported using the following questions: “Are you currently engaged in a professional activity?”; “What is your usual work schedule?” (day exclusively, rotation with no night work, rotation with night work, night work only). The number of work hours per week was also recorded. Participants not currently engaged in a professional activity were excluded from the present analysis. No other exclusion criteria were applied.

**Outcome assessment** Metabolic syndrome was defined according to the Joint Interim Statement <sup>16</sup> as the presence of at least three of the following five conditions: high BP (systolic BP  $\geq 130$  mm Hg or diastolic BP  $\geq 85$  mm Hg or use of antihypertensive medication); visceral obesity (waist circumference  $\geq 88$  cm in women or  $\geq 102$  cm in men); high triglycerides ( $\geq 1.7$  mmol/L, or use of fibrates or nicotinic acid); low HDL-cholesterol levels ( $< 1.30$  mmol/L in women or  $< 1.03$  mmol/L in men, or use of fibrates or nicotinic acid); and high fasting plasma glucose ( $\geq 5.6$  mmol/L or use of anti-diabetic medication). Blood pressure was measured three times on the

1  
2  
3 left arm using an Omron® HEM-907 (Matsusaka, Japan) automated oscillometric  
4 sphygmomanometer after at least a 10-min rest in the seated position. The mean of  
5 the last two measures was used. Venous blood samples were drawn after an  
6 overnight fast to measure the levels of glucose, HDL cholesterol, low HDL-  
7 cholesterol, and triglycerides. Biological assays were performed at the clinical  
8 laboratory of the Lausanne university hospital within two hours of blood collection.  
9  
10 Index of insulin resistance during fasting was assessed by the homeostatic model  
11 assessment of insulin resistance (HOMA-IR), calculated as the fasting insulin level  
12 (in milliunits per milliliter) times the fasting glucose level (in milligrams per liter)  
13 divided by 405. Waist circumference was measured twice with a non-stretchable tape  
14 over the unclothed abdomen at the mid-point between the lowest rib and the iliac  
15 crest. Hip circumference was also measured twice at the greater trochanters. For  
16 waist and hip, the mean of the two measurements was used and the waist-to-hip  
17 ratio (WHR) was calculated.

18  
19  
20  
21  
22  
23  
24  
25  
26  
27  
28  
29  
30  
31  
32  
33  
34  
35  
36  
37  
38 **Covariates** The current socio-professional category was self-reported by  
39 participants. Sociodemographic (age, sex) and lifestyle (smoking habit, alcohol  
40 intake, coffee consumption) data were collected by self-administered questionnaires.  
41 Educational level was categorized as *low* (primary), *middle* (apprenticeship or  
42 secondary school) or *high* (university). Smoking status was categorized as *never*,  
43 *former* or *current*. Body weight and height were measured with participants standing  
44 without shoes in light indoor clothing. Body weight was measured in kilograms to the  
45 nearest 0.1 kg using a Seca™ scale (Seca, Hamburg, Germany). Height was  
46 measured to the nearest 5 mm using a Seca™ height gauge (Seca, Hamburg,  
47  
48  
49  
50  
51  
52  
53  
54  
55  
56  
57  
58  
59  
60

1  
2  
3 Germany). Body mass index (BMI) was defined as weight (kg)/height<sup>2</sup> (m<sup>2</sup>). Obesity  
4  
5 was defined as BMI  $\geq$  30 kg/m<sup>2</sup>.  
6

7  
8 Medication use was coded according to the World Health Organization  
9  
10 Anatomical Therapeutic Chemical (ATC) Classification System  
11  
12 (<http://www.whooc.no/atcddd>). Drugs influencing sleep included hypnotics or  
13  
14 sedatives (N05C), anxiolytics (N05B) and antipsychotics (N05A). Diabetes was  
15  
16 defined as fasting plasma glucose levels  $\geq$ 7.0 mmol/L or use of antidiabetic  
17  
18 medication <sup>17</sup>. Hypertension was defined as systolic BP  $\geq$ 140 mm Hg and/or diastolic  
19  
20 BP  $\geq$ 90 mm Hg, and/or current use of antihypertensive medication.  
21  
22

23  
24 The presence of a current major depressive disorder was retrospectively  
25  
26 assigned according to Diagnostic and Statistical Manual of Mental Disorders, Fourth  
27  
28 Edition (DSM-IV) criteria with information collected at the second and third psychiatric  
29  
30 follow-up evaluation using the French translation of the semi-structured Diagnostic  
31  
32 Interview for Genetic Studies (DIGS). Cardiovascular disease was defined as  
33  
34 previous stroke, heart attack, coronary artery bypass grafting or percutaneous  
35  
36 coronary intervention.  
37  
38

39  
40 Subjective sleep characteristics were determined using the Pittsburgh Sleep  
41  
42 Quality Index (PSQI)<sup>18</sup>, the Epworth Sleepiness Scale (ESS)<sup>19</sup>, and the Berlin  
43  
44 questionnaire for sleep-disordered breathing (SDB)<sup>20</sup>. Sleep quality was assessed  
45  
46 with the PSQI and dichotomized into good/poor sleep quality (score  $\leq$ 5/ $>$ 5), and  
47  
48 excessive daytime sleepiness (EDS) was defined as an ESS score  $>$ 10). A Berlin  
49  
50 score  $\geq$ 2 was defined as indicating a high risk of SDB.  
51  
52

53  
54 Dietary intake was evaluated using a validated Food Frequency Questionnaire  
55  
56 (FFQ) querying the consumption of 97 different food items including portion size over  
57  
58  
59  
60

1  
2  
3 the previous 4 weeks. The daily total energy intake was obtained as well as the  
4  
5 proportion of macronutrients, alcohol and fibers.  
6

7  
8 Physical activity was evaluated with the physical activity frequency  
9  
10 questionnaire (PAFQ)<sup>21</sup>. The questionnaire lists 70 types of physical activity from  
11  
12 various domains (e.g. occupational, housework, leisure time, sports, etc.) and  
13  
14 participants indicated the number of days in the past week (0–7) and the duration per  
15  
16 day (0–10 h, in 15-minute increments) for each activity. Energy expenditure  
17  
18 corresponds to the sum of all the energy expenditure over one week divided by 7 to  
19  
20 obtain a mean energy expenditure over a 24-hour period. Sedentary status was  
21  
22 defined as spending more than 90% of daily energy in activities below moderate and  
23  
24 high intensity (defined as requiring at least 4 times the basal metabolic rate [BMR]).  
25  
26 The percentage of total energy >4 metabolic equivalents (METS) was also calculated  
27  
28 to quantify moderate and high intensity physical activity.  
29  
30  
31  
32  
33  
34

35 **Statistical analysis** Data distribution was graphically assessed using a normal Q-Q  
36  
37 plot. Data were presented as number of participants (%) for categorical variables,  
38  
39 mean  $\pm$  SD for normal distribution, or median and interquartile range for non-normally  
40  
41 distributed continuous variables. Univariate analyses of continuous data were  
42  
43 performed using one-way ANOVA or Kruskal Wallis test follow by Bonferroni's post-  
44  
45 hoc or Tamhane's T2 as appropriate. Categorical variables were analyzed using Chi-  
46  
47 square test or Fisher's exact test as appropriate. The associations between working  
48  
49 schedules (permanent day, day shift work, night shift work and permanent night  
50  
51 work) and metabolic syndrome (and its subcomponents) were determined using  
52  
53 logistic regression analysis. Prior to this, the interaction of sex with the metabolic  
54  
55 syndrome and each of its subcomponents was tested. In case of significant  
56  
57  
58  
59  
60



1  
2  
3 interaction, results were presented for both men and women, otherwise results were  
4 shown for the whole sample. Each cardiometabolic risk factor was first tested in  
5 univariate analysis (crude) then in two models with serial adjustment for potential  
6 confounders. Model 1 was adjusted for age (continuous), educational level (low,  
7 middle, high) and sex (except in case of significant sex\*outcome interaction). Model  
8 2: Model 1 plus weekly alcohol consumption (continuous), smoking status (never,  
9 former, current) and BMI (normal weight, overweight, obese; except for visceral  
10 obesity). Model 3: Model 2 plus daily total energy expenditure (continuous). Box-  
11 Tidwell tests were used to check the assumption of linearity for the logit of each  
12 covariate. If the assumption was violated, the square of the covariate was used or the  
13 covariate was transformed into categorical variable. To assess collinearity between  
14 covariates, a linear regression analysis including all covariates was performed, and  
15 the variance inflation factor (VIF) was calculated. A VIF  $\leq 5$  was considered as  
16 absence of multi-collinearity. Results from logistic regression are presented as OR  
17 values with 95% CI. Permanent day workers were considered as the reference  
18 group.

19  
20 All statistical analyses were performed using IBM SPSS Statistics version 26.0  
21 for Macintosh (IBM Corp). Significant results were considered for a two-sided test  
22 with  $p < 0.05$ .

## 23 24 25 26 27 28 29 30 31 32 33 34 35 36 37 38 39 40 41 42 43 44 45 46 47 48 49 50 51 52 53 54 55 56 57 58 59 60

## Results

**Population characteristics** A total of 2301 participants were engaged in a  
professional activity at the second follow-up of the CoLaus|PsyCoLaus study. Among  
them, 1905 worked exclusively during the daytime (permanent day workers), 220  
were rotation workers with no night work (day shift workers), 134 were rotation

1  
2  
3 workers with night work (night shift workers) and 42 worked exclusively during the  
4 night (permanent night workers) (Supplementary Figure 1).  
5  
6

7  
8 Table 1 and 2 show the baseline characteristics of the sample according to the  
9 four different work schedules. The mean age of the participants was  $56.2 \pm 6.9$  years  
10 and half of the sample (50.1%) were women. The proportions of men/women differed  
11 significantly according to work schedule: women were more likely to work in day shift  
12 and permanent night shift roles, while men were more likely to do night shift work.  
13 Mean BMI and waist circumference were significantly higher in night shift workers  
14 and permanent night workers compared with permanent day workers and day shift  
15 workers ( $p < 0.001$ ). Permanent night shift workers were more likely to smoke than  
16 other groups, whereas night shift workers were less sedentary than their  
17 counterparts. Lipid levels and blood glucose analysis, and sleep parameters in the  
18 different work schedule groups are also shown in Table 1 and 2.  
19  
20  
21  
22  
23  
24  
25  
26  
27  
28  
29  
30  
31  
32  
33  
34

### 35 **Prevalence of metabolic syndrome and its components according to work**

36 **schedules** There were significant interactions between sex and work schedule for  
37 metabolic syndrome ( $p = 0.009$ ), high triglycerides ( $p = 0.043$ ) and visceral obesity  
38 ( $p = 0.047$ ), but not for high BP, high glucose and low HDL-cholesterol.  
39  
40  
41  
42  
43  
44

45 The prevalence of the metabolic syndrome was almost three times higher in  
46 men permanent night workers compared with men permanent day workers; a similar  
47 trend was found for the prevalence of visceral obesity and low HDL-cholesterol  
48 (Table 3). The prevalence of high glucose level in night shift workers and permanent  
49 night workers was nearly double that in permanent day workers (Table 3).  
50  
51  
52  
53  
54  
55  
56  
57  
58  
59  
60

### **Association between metabolic syndrome and work schedules by patient sex**

Compared to men permanent day workers, permanent night workers showed a higher risk of metabolic syndrome in univariate analysis (OR 6.48 [95% CI 2.40-17.46]; Supplementary Table 1). This significant association persisted after adjustment for age, educational level, alcohol consumption, smoking status and daily total energy expenditure (OR 4.45 [95% CI 1.36-14.56]) (Figure 1). Conversely, the risk of metabolic syndrome in day shift-workers was lower than that in permanent day workers in crude analysis (OR 0.36 [95% CI 0.18-0.74]), and after adjustment in models 1 and 2 and 3 (Supplementary Table 1). No significant association between work schedule and metabolic syndrome was found for women.

### **Association of each component of metabolic syndrome with work schedule**

In men, the risk of visceral obesity in permanent night workers was significantly higher than that in permanent day workers, including after adjustment for covariates (Table 4). Moreover, the risk of elevated triglyceride levels in permanent night workers was increased in the crude analysis and after adjustment for age, educational level, alcohol consumption, smoking status and BMI (model 2), but was no longer significant in the fully adjusted model 3 (Table 4).

In women, night shift-workers showed a higher risk of elevated triglyceride levels, which persisted after multiple adjustments (Table 4).

### **Discussion**

In our middle-to-older-aged active general population sample, we found differential associations between permanent night work and the risk of metabolic syndrome for men and women. Indeed, permanent night work was only associated with a higher

1  
2  
3 risk of metabolic syndrome in men but not in women. This association could be  
4  
5 mediated by a higher risk of visceral obesity in men. The increased risk of metabolic  
6  
7 syndrome is in line with previous studies<sup>22</sup>. Some studies even showed that the risk  
8  
9 for the development of metabolic syndrome and each of its components gradually  
10  
11 and independently increases with accumulated years of shift work<sup>23</sup>. Contrary to  
12  
13 other studies, we found no association between permanent night work or night shift-  
14  
15 work and metabolic syndrome in women<sup>24 25</sup>. In contrast to the findings on the  
16  
17 metabolic syndrome as a whole, for the triglycerides component we found an  
18  
19 increased risk of elevated concentrations among shift workers in women but not in  
20  
21 men. This supports previous evidence from Karlsson *et al.* who also reported an  
22  
23 elevated triglyceride level among shift workers in 60-year-old women<sup>26</sup>.

24  
25  
26  
27  
28 While the mechanisms underlying the observed increased risk of metabolic  
29  
30 syndrome in shift or night workers have not been fully elucidated, several explanatory  
31  
32 hypotheses can be proposed. Firstly, sleep duration has been suggested to play a  
33  
34 key role in the development of metabolic syndrome. A previous meta-analysis found  
35  
36 that short sleep duration was significantly associated with a 27% increase in risk of  
37  
38 metabolic syndrome whereas long sleep duration was not<sup>27</sup>. Similar results were  
39  
40 found in both men and women. In our study, self-reported sleep duration did not differ  
41  
42 between the different groups of workers and therefore does not explain the increased  
43  
44 risk of metabolic syndrome observed in permanent night workers among men.  
45  
46 However, we cannot rule out that our findings might have been different if objective  
47  
48 sleep duration measures were used because objective and subjective sleep duration  
49  
50 can differ significantly. Unfortunately, objective sleep assessment could not be  
51  
52 included in our analysis. Moreover, sleep fragmentation or an alteration of sleep  
53  
54 structure due to irregular sleep schedule or circadian rhythm misalignment in night  
55  
56  
57  
58  
59  
60

1  
2  
3 workers cannot be excluded and could be a possible explanation for the increased  
4  
5 risk of metabolic syndrome<sup>28 29</sup>.  
6  
7

8 Secondly, dietary habits could contribute to development of the metabolic  
9  
10 syndrome in night or shift workers, but available studies on this subject are scarce. A  
11  
12 cross-sectional study comparing 98 rotating shift workers to 100 regular day workers  
13  
14 demonstrated that total energy intake and contributions of macronutrients did not  
15  
16 differ between the two groups, except for saturated lipids (+10% in shift workers)<sup>30</sup>.  
17  
18 However, meal distribution was different in the two groups. Similar to other studies<sup>31</sup>  
19  
20  
21  
22  
23  
24  
25  
26  
27  
28  
29  
30  
31  
32  
33  
34  
35  
36  
37  
38  
39  
40  
41  
42  
43  
44  
45  
46  
47  
48  
49  
50  
51  
52  
53  
54  
55  
56  
57  
58  
59  
60  
32, we failed to demonstrate a difference in food intake and macronutrients  
components between night shift workers or permanent night workers compared with  
permanent day workers. Available data from our study mean that, unfortunately, we  
cannot rule out the possibility that night shift workers may have had a different  
circadian distribution of food intake rather than an increase in total daily intake<sup>33</sup>.

Thirdly, circadian rhythm desynchronization could be a major contributor to the  
increased risk of metabolic syndrome among night and shift workers. Still, the  
underlying pathophysiological mechanisms of this association remain poorly  
understood. Some animal studies suggested that reduced melatonin production, due  
to circadian rhythm disruption, could be associated with a higher rate of metabolic  
syndrome<sup>34</sup>. Furthermore, Fonken *et al.* hypothesized that exposure to light at night  
altered circadian organization and affected metabolic parameters in mice<sup>35</sup>. Their  
results emphasized that even weak night lighting (5 lux) is sufficient to desynchronize  
food consumption and physical activity rhythms, which could explain the observed  
metabolic disorders<sup>34</sup>. In humans, Corbalan-Tutau *et al.* reported a reduced daily  
amplitude in melatonin and cortisol circadian patterns associated with metabolic

1  
2  
3 disturbances in women<sup>36</sup>. Unfortunately, we did not measure melatonin and cortisol  
4  
5 to confirm these findings in our sample.  
6

7  
8 With regard to physical activity, we surprisingly found that night shift workers  
9  
10 were more active than day shift workers and permanent day workers. This may be  
11  
12 due to greater opportunities to perform a physical activity compared with other diurnal  
13  
14 workers or to more physically active work among night shift workers, although this  
15  
16 should be interpreted with caution due to limited agreement between estimates of  
17  
18 activity obtained by PAFQ and those obtained from accelerometers<sup>37</sup>.  
19  
20

21  
22 Finally, the higher risk of metabolic syndrome we observed in night shift  
23  
24 workers may be explained by a vitamin D deficiency<sup>38</sup>. It has been shown that high  
25  
26 levels of vitamin D among middle-aged and elderly populations are associated with a  
27  
28 substantial decrease in cardiovascular disease, type 2 diabetes and metabolic  
29  
30 syndrome<sup>39</sup>. Although we did not measure the vitamin D levels in our different groups  
31  
32 of workers, we can hypothesize that permanent night workers have lower exposure  
33  
34 to sunlight and may therefore be at higher risk of vitamin D deficiency<sup>40</sup>.  
35  
36

37  
38 In our study, among the components of the metabolic syndrome, an elevated  
39  
40 risk of visceral obesity was found in men permanent night workers. This finding is  
41  
42 consistent with a recent meta-analysis which found that shift workers had a higher  
43  
44 frequency of abdominal obesity than other obesity types and permanent night  
45  
46 workers demonstrated a 29% higher risk of central obesity than rotating shift  
47  
48 workers<sup>41</sup>.  
49  
50

51  
52 The main strength of the present study is its large population-based sample of  
53  
54 middle-to-older-aged workers with a precise and extensive assessment of cardio-  
55  
56 metabolic phenotypes. Indeed, previous studies were mainly performed in younger  
57  
58 specific populations of workers or in particular sectors of activity, such as public  
59  
60

1  
2  
3 health and emergency, which limit the generalizability to other types of shift or night  
4 work. In addition, most studies have assessed the risk of metabolic syndrome in shift  
5 workers compared with day workers, but few studies have differentiated between  
6 shift workers, permanent night workers and shift workers with and without night work.  
7  
8  
9  
10  
11

12       There are also some limitations that need to be mentioned. First, this study  
13 had a cross-sectional design which did not allow to assess causality but only cross-  
14 sectional associations that remain to be confirmed in prospective studies. Because  
15 the primary aim of the CoLaus|PsyCoLaus study was not to evaluate the impact of  
16 shift work, the questions related to shift work were only asked at the follow-up 2  
17 (2014-2017), preventing us to investigate longitudinal associations. Moreover, no  
18 precise characterization of workstations and work rhythms (hourly amplitude,  
19 direction of rotation, duration of rotations, and duration of exposition) was performed.  
20 Likewise, it would have been interesting to have any information regarding food  
21 intakes or other habits in the workplaces. Second, a “healthy worker effect” with a  
22 selection of “night shift tolerant” workers cannot be ruled out given the older age of  
23 our sample. Third, our sample of permanent night workers is rather small but we may  
24 assume that workers move away from night shift work with advancing age due to  
25 poorer tolerability and less family constraints. Fourth, there were some missing data  
26 on self-reported sleep habits and diet parameters and, despite the use of validated  
27 questionnaires, declaration bias remains possible. Similarly, only self-reported  
28 physical activity was assessed in this study and it would have been interesting to  
29 have objective measures of physical activity and sleep to more accurately investigate  
30 their influence.  
31  
32  
33  
34  
35  
36  
37  
38  
39  
40  
41  
42  
43  
44  
45  
46  
47  
48  
49  
50  
51  
52  
53  
54

## 55 56 57 58 **CONCLUSION** 59 60

1  
2  
3 Only men permanent night workers were at increased risk of metabolic syndrome  
4 compared with permanent day workers, and this association persisted after  
5  
6 adjustment for sociodemographic confounders and daily total energy expenditure.  
7  
8 From a clinical point of view, we advise monitor of not only BMI but also visceral  
9  
10 obesity, particularly in men permanent night workers. Further prospective studies are  
11  
12 needed to confirm these cross-sectional results and elucidate the underline  
13  
14 mechanisms.  
15  
16  
17  
18  
19  
20  
21  
22  
23  
24  
25  
26  
27  
28  
29  
30  
31  
32  
33  
34  
35  
36  
37  
38  
39  
40  
41  
42  
43  
44  
45  
46  
47  
48  
49  
50  
51  
52  
53  
54  
55  
56  
57  
58  
59  
60

For peer review only



## ARTICLE INFORMATION

### Acknowledgments

The authors thank Prof. Mehdi Tafti, Prof. Vincent Mooser, Daniela Andries and Nadia Tobback for their important contribution to the HypnoLaus and CoLaus|PsyCoLaus Cohorts, the Lausanne population who volunteered to participate in the CoLaus|PsyCoLaus and HypnoLaus studies, as well as the whole team of CoLaus|PsyCoLaus.

### Funding

The HypnoLaus and the CoLaus/ PsyCoLaus studies were and are supported by research grants from GlaxoSmithKline ('not applicable'), the Faculty of Biology and Medicine of Lausanne ('not applicable'), the Swiss National Science Foundation (grants 3200B0-105993, 3200B0-118308, 33CSCO-122661, 33CS30-139468 and 33CS30- 148401), Leenaards Foundation ('not applicable'), and Vaud Pulmonary League ('not applicable'). The contents of this research are solely the responsibility of the authors.

### Author Disclosures

The authors have no conflicts of interest to declare.

### Contributors

VB, MB, PMV, MP and RH designed the study. JHR, PMV, MPFS, MP and RH collected the data. MB performed the statistical analysis. VB, MB, GS, JHR, PMV, MPFS, MP, DL and RH interpreted the data. VB and MB wrote the first draft of the manuscript and GS, JHR, PMV, MPFS, MP, DL and RH critically reviewed the

1  
2  
3 manuscript. All authors undertake to give final approval of the version to be published  
4  
5 and agree to be accountable for all aspects of the work. VB is the guarantor of this  
6  
7 work and, as such, had full access to all the data in the study and takes responsibility  
8  
9 for the integrity of the data and the accuracy of the data analysis.  
10  
11

## 12 **Data availability statement**

13  
14 Data may be obtained from a third party and are not publicly available. All data  
15  
16 relevant to the study are included in the article or uploaded as supplementary  
17  
18 information.  
19  
20  
21  
22

## 23 **References**

- 24  
25  
26 1 Nappo N. Is there an association between working conditions and health? An  
27  
28 analysis of the Sixth European Working Conditions Survey data. *PLoS One*  
29  
30 2019;14:e0211294.  
31  
32
- 33 2 Puttonen S, Viitasalo K, Harma M. Effect of shiftwork on systemic markers of  
34  
35 inflammation. *Chronobiol Int* 2011;28:528-35.  
36  
37
- 38 3 Sallinen M, Kecklund G. Shift work, sleep, and sleepiness - differences between  
39  
40 shift schedules and systems. *Scand J Work Environ Health* 2010;36:121-33.  
41  
42
- 43 4 Knutson KL, Spiegel K, Penev P, Van Cauter E. The metabolic consequences of  
44  
45 sleep deprivation. *Sleep Med Rev* 2007;11:163-78.  
46  
47
- 48 5 Faraut B, Bayon V, Leger D. Neuroendocrine, immune and oxidative stress in shift  
49  
50 workers. *Sleep Med Rev* 2013;17:433-44.  
51  
52
- 53 6 Kecklund G, Axelsson J. Health consequences of shift work and insufficient sleep.  
54  
55 *BMJ* 2016;355:i5210.  
56  
57  
58  
59  
60

- 1  
2  
3 7 Drake CL, Roehrs T, Richardson G, Walsh JK, Roth T. Shift work sleep disorder:  
4 prevalence and consequences beyond that of symptomatic day workers. *Sleep*  
5 2004;27:1453-62.  
6  
7
- 8 8 Morikawa Y, Nakagawa H, Miura K et al. Effect of shift work on body mass index  
9 and metabolic parameters. *Scand J Work Environ Health* 2007;33:45-50.  
10  
11
- 12 9 Wang D, Ruan W, Chen Z, Peng Y, Li W. Shift work and risk of cardiovascular  
13 disease morbidity and mortality: A dose-response meta-analysis of cohort studies.  
14 *Eur J Prev Cardiol* 2018;25:1293-1302.  
15  
16
- 17 10 Wu SH, Liu Z, Ho SC. Metabolic syndrome and all-cause mortality: a meta-analysis  
18 of prospective cohort studies. *Eur J Epidemiol* 2010;25:375-84.  
19  
20
- 21 11 Galassi A, Reynolds K, He J. Metabolic syndrome and risk of cardiovascular  
22 disease: a meta-analysis. *Am J Med* 2006;119:812-9.  
23  
24
- 25 12 Karlsson B, Knutsson A, Lindahl B. Is there an association between shift work and  
26 having a metabolic syndrome? Results from a population based study of 27,485  
27 people. *Occup Environ Med* 2001;58:747-52.  
28  
29
- 30 13 Violanti JM, Burchfiel CM, Hartley TA et al. Atypical work hours and metabolic  
31 syndrome among police officers. *Arch Environ Occup Health* 2009;64:194-201.  
32  
33
- 34 14 Canuto R, Garcez AS, Olinto MT. Metabolic syndrome and shift work: a systematic  
35 review. *Sleep Med Rev* 2013;17:425-31.  
36  
37
- 38 15 Firmann M, Mayor V, Vidal PM et al. The CoLaus study: a population-based study  
39 to investigate the epidemiology and genetic determinants of cardiovascular risk  
40 factors and metabolic syndrome. *BMC Cardiovasc Disord* 2008;8:6.  
41  
42
- 43 16 Alberti KG, Eckel RH, Grundy SM et al. Harmonizing the metabolic syndrome: a  
44 joint interim statement of the International Diabetes Federation Task Force on  
45 Epidemiology and Prevention; National Heart, Lung, and Blood Institute; American  
46  
47  
48  
49  
50  
51  
52  
53  
54  
55  
56  
57  
58  
59  
60

- 1  
2  
3 Heart Association; World Heart Federation; International Atherosclerosis Society;  
4 and International Association for the Study of Obesity. *Circulation* 2009;120:1640-  
5  
6  
7 5.  
8  
9  
10 17 American Diabetes A. Diagnosis and classification of diabetes mellitus. *Diabetes*  
11  
12 *Care* 2014;37 Suppl 1:S81-90.  
13  
14 18 Buysse DJ, Reynolds CF, 3rd, Monk TH, Berman SR, Kupfer DJ. The Pittsburgh  
15  
16 Sleep Quality Index: a new instrument for psychiatric practice and research.  
17  
18 *Psychiatry Res* 1989;28:193-213.  
19  
20 19 Johns MW. A new method for measuring daytime sleepiness: the Epworth  
21  
22 sleepiness scale. *Sleep* 1991;14:540-5.  
23  
24 20 Netzer NC, Stoohs RA, Netzer CM, Clark K, Strohl KP. Using the Berlin  
25  
26 Questionnaire to identify patients at risk for the sleep apnea syndrome. *Ann Intern*  
27  
28 *Med* 1999;131:485-91.  
29  
30 21 Bernstein M, Sloutskis D, Kumanyika S, Sparti A, Schutz Y, Morabia A. Data-based  
31  
32 approach for developing a physical activity frequency questionnaire. *Am J*  
33  
34 *Epidemiol* 1998;147:147-54.  
35  
36 22 Wang F, Zhang L, Zhang Y et al. Meta-analysis on night shift work and risk of  
37  
38 metabolic syndrome. *Obes Rev* 2014;15:709-20.  
39  
40 23 De Bacquer D, Van Risseghem M, Clays E, Kittel F, De Backer G, Braeckman L.  
41  
42 Rotating shift work and the metabolic syndrome: a prospective study. *Int J*  
43  
44 *Epidemiol* 2009;38:848-54.  
45  
46 24 Lim YC, Hoe VCW, Darius A, Bhoo-Pathy N. Association between night-shift work,  
47  
48 sleep quality and metabolic syndrome. *Occup Environ Med* 2018;75:716-723.  
49  
50 25 Guo Y, Rong Y, Huang X et al. Shift work and the relationship with metabolic  
51  
52 syndrome in Chinese aged workers. *PLoS One* 2015;10:e0120632.  
53  
54  
55  
56  
57  
58  
59  
60

- 1  
2  
3 26 Karlsson B, Knutsson A, Lindahl B. Is there an association between shift work and  
4 having a metabolic syndrome? Results from a population based study of 27,485  
5 people. *Occupational and Environmental Medicine* 2001;58:747-752.  
6  
7  
8  
9  
10 27 Xi B, He D, Zhang M, Xue J, Zhou D. Short sleep duration predicts risk of metabolic  
11 syndrome: a systematic review and meta-analysis. *Sleep Med Rev* 2014;18:293-  
12 7.  
13  
14  
15  
16 28 Stamatakis KA, Punjabi NM. Effects of sleep fragmentation on glucose metabolism  
17 in normal subjects. *Chest* 2010;137:95-101.  
18  
19  
20 29 Tasali E, Leproult R, Ehrmann DA, Van Cauter E. Slow-wave sleep and the risk of  
21 type 2 diabetes in humans. *Proc Natl Acad Sci U S A* 2008;105:1044-9.  
22  
23  
24 30 Esquirol Y, Bongard V, Mabile L, Jonnier B, Soulat JM, Perret B. Shift work and  
25 metabolic syndrome: respective impacts of job strain, physical activity, and dietary  
26 rhythms. *Chronobiol Int* 2009;26:544-59.  
27  
28  
29  
30 31 de Assis MA, Kupek E, Nahas MV, Bellisle F. Food intake and circadian rhythms  
31 in shift workers with a high workload. *Appetite* 2003;40:175-83.  
32  
33  
34 32 Morikawa Y, Miura K, Sasaki S et al. Evaluation of the effects of shift work on  
35 nutrient intake: a cross-sectional study. *J Occup Health* 2008;50:270-8.  
36  
37  
38 33 Molzof HE, Wirth MD, Burch JB et al. The impact of meal timing on cardiometabolic  
39 syndrome indicators in shift workers. *Chronobiol Int* 2017;34:337-348.  
40  
41  
42 34 Fonken LK, Workman JL, Walton JC et al. Light at night increases body mass by  
43 shifting the time of food intake. *Proc Natl Acad Sci U S A* 2010;107:18664-9.  
44  
45  
46 35 Fonken LK, Nelson RJ. The effects of light at night on circadian clocks and  
47 metabolism. *Endocr Rev* 2014;35:648-70.  
48  
49  
50  
51  
52  
53  
54  
55  
56  
57  
58  
59  
60

- 1  
2  
3 36 Corbalan-Tutau D, Madrid JA, Nicolas F, Garaulet M. Daily profile in two circadian  
4 markers "melatonin and cortisol" and associations with metabolic syndrome  
5 components. *Physiol Behav* 2014;123:231-5.  
6  
7  
8  
9  
10 37 Verhoog S, Gubelmann C, Guessous I, Bano A, Franco OH, Marques-Vidal P.  
11 Comparison of the Physical Activity Frequency Questionnaire (PAFQ) with  
12 accelerometry in a middle-aged and elderly population: The CoLaus study.  
13 *Maturitas* 2019;129:68-75.  
14  
15  
16  
17  
18 38 Ju SY, Jeong HS, Kim DH. Blood vitamin D status and metabolic syndrome in the  
19 general adult population: a dose-response meta-analysis. *J Clin Endocrinol Metab*  
20 2014;99:1053-63.  
21  
22  
23  
24  
25  
26 39 Parker J, Hashmi O, Dutton D et al. Levels of vitamin D and cardiometabolic  
27 disorders: systematic review and meta-analysis. *Maturitas* 2010;65:225-36.  
28  
29  
30 40 Daugaard S, Garde AH, Hansen AM, Vistisen HT, Rejnmark L, Kolstad HA. Indoor,  
31 outdoor, and night work and blood concentrations of vitamin D and parathyroid  
32 hormone. *Scand J Work Environ Health* 2018;44:647-657.  
33  
34  
35  
36  
37 41 Sun M, Feng W, Wang F et al. Meta-analysis on shift work and risks of specific  
38 obesity types. *Obes Rev* 2018;19:28-40.  
39  
40  
41  
42  
43  
44  
45  
46  
47  
48  
49  
50  
51  
52  
53  
54  
55  
56  
57  
58  
59  
60

**Table 1.** Baseline characteristics according to work schedules

|                                               | Permanent day<br>workers (n = 1905) | Day shift workers<br>(n = 220) | Night shift workers<br>(n = 134) | Permanent night<br>workers (n = 42) | p-value          | N Total |
|-----------------------------------------------|-------------------------------------|--------------------------------|----------------------------------|-------------------------------------|------------------|---------|
| <b>Demographics &amp; anthropometrics</b>     |                                     |                                |                                  |                                     |                  |         |
| Age (years)                                   | 55.0 (50.0–60.0)                    | 55.0 (50.5–59.5)               | 54.5 (50.4–58.6)                 | 53.0 (48.8–57.2)                    | 0.070            | 2275    |
| Men, n (%)                                    | 958 (50.3)                          | 89 (40.5) <sup>a</sup>         | 88 (65.7) <sup>a</sup>           | 18 (42.9)                           | <b>&lt;0.001</b> | 2301    |
| Educational level, n (%)                      |                                     |                                |                                  |                                     | <b>&lt;0.001</b> | 2300    |
| Low                                           | 791 (41.5)                          | 112 (50.9)                     | 71 (53.0)                        | 30 (71.4) <sup>a</sup>              |                  |         |
| High                                          | 591 (31.0) <sup>a</sup>             | 43 (19.5)                      | 23 (17.2)                        | 2 (4.8)                             |                  |         |
| Body-mass index (kg/m <sup>2</sup> )          | 25.4 (22.6–28.5)                    | 25.5 (23.1–27.6)               | 26.0 (23.2–30.0) <sup>b</sup>    | 27.9 (25.4–31.3) <sup>b,c</sup>     | <b>&lt;0.001</b> | 2228    |
| Waist circumference (cm)                      | 89.5 (81.0–98.5)                    | 89.0 (81.4–96.0)               | 93.0 (84.3–102.0) <sup>b,c</sup> | 95.0 (85.3–109.0) <sup>b,c</sup>    | <b>&lt;0.001</b> | 2227    |
| Waist to hip ratio                            | 0.88 ± 0.09                         | 0.87 ± 0.08                    | 0.90 ± 0.09 <sup>b,c</sup>       | 0.90 ± 0.09                         | <b>0.013</b>     | 2227    |
| <b>Risk factors</b>                           |                                     |                                |                                  |                                     |                  |         |
| Metabolic syndrome, n (%)                     | 327 (17.2)                          | 25 (11.4)                      | 25 (18.7)                        | 17 (40.5) <sup>a</sup>              | <b>&lt;0.001</b> | 2301    |
| Number of metabolic risk factors <sup>†</sup> | 1 (0–2)                             | 1 (0–2)                        | 1 (0–2)                          | 2 (1–3) <sup>b,c</sup>              | <b>0.006</b>     | 2301    |
| Current major depressive disorder, n (%)      | 115 (7.9)                           | 19 (11.7)                      | 10 (9.6)                         | 4 (12.1)                            | 0.319            | 1756    |
| Hypertension, n (%)                           | 653 (34.9)                          | 80 (36.7)                      | 45 (33.6)                        | 12 (28.6)                           | 0.764            | 2263    |
| Diabetes, n (%)                               | 100 (5.4)                           | 8 (3.7)                        | 18 (13.6) <sup>a</sup>           | 4 (9.5)                             | <b>&lt;0.001</b> | 2231    |
| Dyslipidemia, n (%)                           | 413 (22.5)                          | 51 (23.6)                      | 29 (22.1)                        | 16 (38.1)                           | 0.123            | 2226    |
| Sleep drugs, n (%)                            | 109 (5.7)                           | 14 (6.4)                       | 4 (3.0)                          | 4 (9.5)                             | 0.367            | 2301    |
| Cardiovascular disease, n (%) <sup>††</sup>   | 55 (2.9)                            | 12 (5.5)                       | 5 (3.7)                          | 3 (7.1)                             | 0.102            | 2291    |
| <b>Risk factors</b>                           |                                     |                                |                                  |                                     |                  |         |
| Smoking status, n (%)                         |                                     |                                |                                  |                                     | <b>0.011</b>     | 2246    |
| Former                                        | 689 (37.0)                          | 86 (40.8)                      | 57 (43.8)                        | 9 (22.0) <sup>a</sup>               |                  |         |
| Current                                       | 404 (21.7)                          | 44 (20.9)                      | 22 (16.9)                        | 18 (43.9) <sup>a</sup>              |                  |         |

|                                      |                  |                  |                                 |                  |                  |      |
|--------------------------------------|------------------|------------------|---------------------------------|------------------|------------------|------|
| Alcohol (units/week)                 | 4 (1–9)          | 3 (0–7)          | 3 (0–7)                         | 2 (0–6)          | <b>0.010</b>     | 2162 |
| Coffee consumption, n (%)            |                  |                  |                                 |                  | 0.961            | 2222 |
| None                                 | 186 (10.1)       | 23 (11.0)        | 13 (10.2)                       | 4 (9.8)          |                  |      |
| 1–3 cups/day                         | 1154 (62.6)      | 134 (64.1)       | 78 (60.9)                       | 28 (68.3)        |                  |      |
| ≥4 cups/day                          | 504 (27.3)       | 52 (24.9)        | 37 (28.9)                       | 9 (22.0)         |                  |      |
| Total energy intake (Kcals/day)      | 1756 ± 664       | 1761 ± 654       | 1828 ± 719                      | 1853 ± 619       | 0.603            | 1996 |
| Physical activity                    |                  |                  |                                 |                  |                  |      |
| Total energy expenditure (Kcals/day) | 2656 (2297–3076) | 2698 (2336–3046) | 3118 (2735–3578) <sup>b,c</sup> | 2663 (2356–3164) | <b>&lt;0.001</b> | 1828 |
| Activity ≥4 MET (% total activity)   | 10.1 (1.9–18.4)  | 8.8 (1.2–20.2)   | 14.4 (4.9–25.3) <sup>b</sup>    | 6.5 (0.3–16.1)   | <b>0.005</b>     | 1828 |
| Sedentary status, n (%)              | 758 (49.2)       | 92 (55.1)        | 32 (34.4) <sup>a</sup>          | 16 (57.1)        | <b>0.011</b>     | 1828 |
| <b>Blood analysis</b>                |                  |                  |                                 |                  |                  |      |
| Total cholesterol (mmol/L)           | 5.3 ± 0.9        | 5.4 ± 0.9        | 5.3 ± 0.9                       | 5.4 ± 1.0        | 0.928            | 2226 |
| HDL cholesterol (mmol/L)             | 1.5 (1.2–1.9)    | 1.6 (1.3–1.9)    | 1.4 (1.2–1.8)                   | 1.4 (1.1–1.7)    | <b>0.013</b>     | 2226 |
| LDL cholesterol (mmol/L)             | 3.2 ± 0.8        | 3.2 ± 0.8        | 3.2 ± 0.8                       | 3.2 ± 0.9        | 0.958            | 2226 |
| Triglycerides (mmol/L)               | 1.0 (0.8–1.4)    | 1.0 (0.8–1.5)    | 1.1 (0.8–1.5)                   | 1.2 (0.9–1.8)    | 0.278            | 2226 |
| Fasting glucose (mmol/L)             | 5.2 (4.9–5.5)    | 5.1 (4.8–5.5)    | 5.2 (4.9–5.8)                   | 5.5 (5–5.9)      | <b>0.026</b>     | 2226 |
| Insulin (microlU/mL)                 | 7 (4.8–10.6)     | 7.2 (4.6–10.9)   | 7.3 (5.0–11.7)                  | 8.8 (6.5–12.9)   | <b>0.027</b>     | 2218 |
| HOMA-IR <sup>†††</sup>               | 1.6 (1.1–2.6)    | 1.6 (1.0–2.6)    | 1.7 (1.2–3.2)                   | 2.1 (1.5–3.4)    | <b>0.012</b>     | 2218 |

Data are presented as mean ± SD or median and interquartile range for continuous variables and number of participants (%) for categorical variables. P-value < 0.05 are shown in bold. <sup>a</sup> adjusted residual > | 2 |; <sup>b</sup> statistically different from "day only"; <sup>c</sup> statistically different from "shift work without night". † Metabolic risk factor corresponded to the five risk factors which defined the metabolic syndrome according to the Joint Interim Statement <sup>16</sup>: Systolic blood pressure ≥130 mmHg or diastolic blood pressure ≥85 mmHg or use of antihypertensive medication; waist circumference ≥88 cm in women or ≥102 cm in men); triglycerides ≥1.7 mmol/L, or use of fibrates or nicotinic acid; HDL-cholesterol <1.30 mmol/L in women or <1.03 mmol/L in men, or use of fibrates or nicotinic acid; and high fasting plasma glucose (≥5.6 mmol/L or use of anti-diabetic



1  
2  
3 medication). †† Cardiovascular disease was defined by previous stroke, heart attack, coronary artery bypass grafting or percutaneous coronary  
4 intervention. ††† Index of insulin resistance during fasting was assessed by the homeostatic model assessment of insulin resistance (HOMA-IR),  
5 calculated as the fasting insulin level (in milliunits per milliliter) times the fasting glucose level (in milligrams per liter) divided by 405.  
6  
7

8 HDL: high density lipoprotein; LDL: low density lipoprotein; MET: metabolic equivalent of task.  
9  
10  
11  
12  
13  
14  
15  
16  
17  
18  
19  
20  
21  
22  
23  
24  
25  
26  
27  
28  
29  
30  
31  
32  
33  
34  
35  
36  
37  
38  
39  
40  
41  
42  
43  
44  
45  
46

For peer review only

**Table 2.** Working and sleep characteristics according to work schedules

|                                                  | Permanent day<br>workers (n = 1905) | Day shift workers<br>(n = 220) | Night shift workers<br>(n = 134) | Permanent night<br>workers (n = 42) | p-value          | N Total |
|--------------------------------------------------|-------------------------------------|--------------------------------|----------------------------------|-------------------------------------|------------------|---------|
| <b>Working characteristics</b>                   |                                     |                                |                                  |                                     |                  |         |
| Number of working hours/week                     | 38.0 ± 14.7                         | 38.7 ± 15.2                    | 43.1 ± 18.1                      | 38.0 ± 15.2                         | 0.260            | 2285    |
| Work time, n (%)                                 |                                     |                                |                                  |                                     | 0.397            | 2258    |
| Full-time                                        | 1569 (83.8)                         | 181 (84.6)                     | 111 (86.0)                       | 39 (92.9)                           |                  |         |
| <50%                                             | 304 (16.2)                          | 33 (15.4)                      | 18 (14.0)                        | 3 (7.1)                             |                  |         |
| Example of physical intensity at work, n (%)     |                                     |                                |                                  |                                     | <b>&lt;0.001</b> | 2135    |
| Sedentary (sitting/driving)                      | 1409 (79.5)                         | 105 (51.2)                     | 66 (55.0)                        | 14 (37.8)                           |                  |         |
| Pushing wheelbarrow                              | 283 (16.0)                          | 81 (39.5)                      | 40 (33.3)                        | 16 (43.2)                           |                  |         |
| Unloading a truck without assist.                | 81 (4.6)                            | 19 (9.3)                       | 14 (11.7)                        | 7 (18.9)                            |                  |         |
| <b>Sleep &amp; vigilance</b>                     |                                     |                                |                                  |                                     |                  |         |
| Epworth Sleepiness Scale score                   | 6 (4–8)                             | 5 (3–8)                        | 6 (4–9)                          | 5 (3–8)                             | 0.623            | 1786    |
| Excessive daytime sleepiness, n (%) <sup>‡</sup> | 182 (12.1)                          | 20 (12.6)                      | 14 (14.0)                        | 3 (11.1)                            | 0.950            | 1786    |
| Poor sleep quality, n (%) <sup>‡‡</sup>          | 415 (31.5)                          | 46 (37.4)                      | 27 (32.1)                        | 7 (35.0)                            | 0.600            | 1542    |
| High risk of SDB, n (%) <sup>§</sup>             | 321 (21.3)                          | 34 (21.0)                      | 29 (28.4)                        | 8 (27.6)                            | 0.323            | 1800    |
| Self-reported total sleep time (h)               | 6.9 ± 1.0                           | 6.8 ± 0.9                      | 6.9 ± 1.0                        | 7.1 ± 1.3                           | 0.507            | 1542    |

Data are presented as mean ± SD or median and interquartile range for continuous variables and number of participants (%) for categorical variables. P-value

< 0.05 are shown in bold. <sup>‡</sup> Excessive daytime sleepiness was defined by an Epworth Sleepiness Scale score >10; <sup>‡‡</sup> Poor sleep quality was defined by a

Pittsburgh Sleep Quality Index score >5; <sup>§</sup> High risk of SDB was defined by a Berlin score >2.

**Table 3.** Prevalence of metabolic syndrome and its subcomponents according to work schedule

|                     | Permanent<br>day workers<br>(n = 1905) | Day shift<br>workers<br>(n = 220) | Night shift<br>workers<br>(n = 134) | Permanent<br>night workers<br>(n = 42) | p-value          |
|---------------------|----------------------------------------|-----------------------------------|-------------------------------------|----------------------------------------|------------------|
| Metabolic syndrome  |                                        |                                   |                                     |                                        |                  |
| Men                 | 226 (23.6)                             | 9 (10.1)                          | 17 (19.3)                           | 12 (66.7)                              | <b>&lt;0.001</b> |
| Women               | 101 (10.7)                             | 16 (12.2)                         | 8 (17.4)                            | 5 (20.8)                               | 0.225            |
| High BP             | 826 (43.4)                             | 91 (41.4)                         | 64 (47.8)                           | 23 (54.8)                              | 0.313            |
| High glucose        | 472 (24.8)                             | 50 (22.7)                         | 47 (35.1)                           | 16 (38.1)                              | <b>0.010</b>     |
| High triglycerides  |                                        |                                   |                                     |                                        |                  |
| Men                 | 243 (26.2)                             | 25 (29.1)                         | 18 (21.2)                           | 11 (61.1)                              | <b>0.006</b>     |
| Women               | 86 (9.5)                               | 16 (12.3)                         | 9 (19.6)                            | 3 (12.5)                               | 0.183            |
| Low HDL-cholesterol | 201 (10.9)                             | 19 (8.8)                          | 10 (7.6)                            | 9 (21.4)                               | 0.064            |
| Visceral obesity    |                                        |                                   |                                     |                                        |                  |
| Men                 | 220 (23.7)                             | 16 (18.6)                         | 23 (26.7)                           | 11 (61.1)                              | <b>0.002</b>     |
| Women               | 302 (33.3)                             | 55 (42.3)                         | 21 (45.7)                           | 11 (45.8)                              | 0.051            |

Data are presented as n (%).

Where there was an interaction of outcome\*sex, results are presented separately for men and women, otherwise for the whole cohort.

**Table 4.** Association of each component of the metabolic syndrome with work schedule

|                             | Crude             |              | Model 1           |              | Model 2           |              | Model 3           |              |
|-----------------------------|-------------------|--------------|-------------------|--------------|-------------------|--------------|-------------------|--------------|
|                             | OR (95% CI)       | p-value      | OR (95% CI)       | p-value      | OR (95% CI)       | p-value      | OR (95% CI)       | p-value      |
| <b>High BP</b>              | <i>n</i> = 2301   |              | <i>n</i> = 2274   |              | <i>n</i> = 2066   |              | <i>n</i> = 1731   |              |
| Day shift-workers           | 0.92 (0.69-1.22)  | 0.572        | 1.05 (0.78-1.42)  | 0.746        | 1.02 (0.73-1.42)  | 0.907        | 1.06 (0.73-1.54)  | 0.757        |
| Night shift-workers         | 1.19 (0.84-1.70)  | 0.321        | 1.02 (0.70-1.49)  | 0.912        | 0.92 (0.61-1.39)  | 0.682        | 1.01 (0.62-1.63)  | 0.983        |
| Permanent night workers     | 1.58 (0.86-2.92)  | 0.144        | 1.78 (0.93-3.41)  | 0.081        | 1.60 (0.77-3.31)  | 0.204        | 1.90 (0.79-4.58)  | 0.155        |
| <b>High fasting glucose</b> | <i>n</i> = 2301   |              | <i>n</i> = 2274   |              | <i>n</i> = 2066   |              | <i>n</i> = 1731   |              |
| Day shift-workers           | 0.89 (0.64-1.25)  | 0.504        | 1.05 (0.74-1.50)  | 0.776        | 1.07 (0.73-1.58)  | 0.735        | 1.04 (0.66-1.63)  | 0.883        |
| Night shift-workers         | 1.64 (1.13-2.37)  | <b>0.009</b> | 1.36 (0.91-2.02)  | 0.135        | 1.44 (0.93-2.24)  | 0.106        | 1.26 (0.74-2.14)  | 0.389        |
| Permanent night workers     | 1.87 (0.99-3.51)  | 0.052        | 2.14 (1.07-4.29)  | <b>0.031</b> | 1.70 (0.79-3.64)  | 0.173        | 1.31 (0.52-3.29)  | 0.572        |
| <b>High triglycerides</b>   |                   |              |                   |              |                   |              |                   |              |
| <i>Men</i>                  | <i>n</i> = 1117   |              | <i>n</i> = 1116   |              | <i>n</i> = 1038   |              | <i>n</i> = 886    |              |
| Day shift-workers           | 1.16 (0.71-1.88)  | 0.562        | 1.14 (0.70-1.87)  | 0.593        | 1.30 (0.77-2.19)  | 0.324        | 1.32 (0.73-2.40)  | 0.360        |
| Night shift-workers         | 0.76 (0.44-1.30)  | 0.313        | 0.74 (0.43-1.28)  | 0.287        | 0.86 (0.49-1.52)  | 0.604        | 0.97 (0.52-1.84)  | 0.936        |
| Permanent night workers     | 4.43 (1.70-11.56) | <b>0.002</b> | 4.31 (1.64-11.30) | <b>0.003</b> | 3.50 (1.19-10.26) | <b>0.023</b> | 3.27 (0.99-10.77) | 0.051        |
| <i>Women</i>                | <i>n</i> = 1109   |              | <i>n</i> = 1105   |              | <i>n</i> = 1020   |              | <i>n</i> = 837    |              |
| Day shift-workers           | 1.34 (0.76-2.37)  | 0.309        | 1.34 (0.75-2.38)  | 0.320        | 1.19 (0.63-2.24)  | 0.594        | 0.92 (0.41-2.03)  | 0.828        |
| Night shift-workers         | 2.33 (1.09-4.99)  | <b>0.030</b> | 2.29 (1.06-4.95)  | <b>0.035</b> | 2.65 (1.14-6.15)  | <b>0.023</b> | 2.92 (1.03-8.27)  | <b>0.044</b> |
| Permanent night workers     | 1.37 (0.40-4.68)  | 0.618        | 1.36 (0.39-4.73)  | 0.625        | 1.09 (0.30-3.97)  | 0.899        | 0.53 (0.06-4.32)  | 0.549        |
| <b>Low HDL-cholesterol</b>  | <i>n</i> = 2226   |              | <i>n</i> = 2221   |              | <i>n</i> = 2058   |              | <i>n</i> = 1723   |              |
| Day shift-workers           | 0.79 (0.50-1.29)  | 0.336        | 0.75 (0.46-1.23)  | 0.255        | 0.62 (0.28-1.40)  | 0.252        | 0.74 (0.39-1.39)  | 0.348        |

|                         |                   |              |                   |              |                   |              |                   |              |
|-------------------------|-------------------|--------------|-------------------|--------------|-------------------|--------------|-------------------|--------------|
| Night shift-workers     | 0.67 (0.35-1.30)  | 0.240        | 0.60 (0.31-1.18)  | 0.138        | 0.58 (0.29-1.15)  | 0.116        | 0.66 (0.30-1.45)  | 0.300        |
| Permanent night workers | 2.22 (1.05-4.71)  | <b>0.038</b> | 1.90 (0.89-4.08)  | 0.099        | 1.61 (0.71-3.64)  | 0.252        | 1.47 (0.52-4.18)  | 0.468        |
| <b>Visceral obesity</b> |                   |              |                   |              |                   |              |                   |              |
| <i>Men</i>              | <i>n</i> = 1119   |              | <i>n</i> = 1118   |              | <i>n</i> = 1043   |              | <i>n</i> = 890    |              |
| Day shift-workers       | 0.74 (0.42-1.29)  | 0.288        | 0.75 (0.42-1.34)  | 0.333        | 0.84 (0.47-1.51)  | 0.561        | 0.72 (0.36-1.42)  | 0.341        |
| Night shift-workers     | 1.18 (0.71-1.94)  | 0.525        | 1.11 (0.66-1.84)  | 0.704        | 1.06 (0.61-1.85)  | 0.257        | 0.84 (0.44-1.63)  | 0.612        |
| Permanent night workers | 5.06 (1.94-13.22) | <b>0.001</b> | 5.27 (1.99-13.98) | <b>0.001</b> | 4.79 (1.64-14.03) | <b>0.004</b> | 3.35 (1.04-10.76) | <b>0.042</b> |
| <i>Women</i>            | <i>n</i> = 1108   |              | <i>n</i> = 1104   |              | <i>n</i> = 1022   |              | <i>n</i> = 839    |              |
| Day shift-workers       | 1.47 (1.01-2.14)  | <b>0.043</b> | 1.48 (1.01-2.17)  | <b>0.043</b> | 1.31 (0.87-1.97)  | 0.194        | 1.05 (0.65-1.70)  | 0.852        |
| Night shift-workers     | 1.70 (0.93-3.06)  | 0.086        | 1.79 (0.98-3.29)  | 0.059        | 1.91 (1.01-3.62)  | <b>0.047</b> | 1.51 (0.66-3.10)  | 0.324        |
| Permanent night workers | 1.70 (0.75-3.84)  | 0.203        | 1.69 (0.73-3.92)  | 0.219        | 1.75 (0.72-4.23)  | 0.217        | 0.83 (0.23-2.99)  | 0.971        |

Data are presented as odds ratio (OR) and 95% confidence intervals (CI). For each component analyzed, the “permanent day workers” were considered as the reference group. *p*-values <0.05 are in bold. Model 1 was adjusted for age (continuous), age square (continuous), sex (except for sex subanalysis) and educational level (middle, low, high). Model 2 was additionally adjusted for weekly alcohol consumption (continuous), smoking status (never, former, current) and for BMI (normal weight, overweight, obese) (except for visceral obesity). Model 3 was additionally adjusted for daily total energy expenditure (continuous).

## FIGURE LEGENDS

**Figure 1.** Multivariable-adjusted risk of metabolic syndrome according to work schedule and sex.

Data are presented on a logarithmic scale and were analyzed using multivariable logistic regression with adjustment for age, educational level, weekly alcohol consumption, smoking status and daily total energy expenditure (Model 3).

For peer review only

1  
2  
3  
4  
5  
6  
7  
8  
9  
10  
11  
12  
13  
14  
15  
16  
17  
18  
19  
20  
21  
22  
23  
24  
25  
26  
27  
28  
29  
30  
31  
32  
33  
34  
35  
36  
37  
38  
39  
40  
41  
42  
43  
44  
45  
46  
47  
48  
49  
50  
51  
52  
53  
54  
55  
56  
57  
58  
59  
60



Figure 1. Multivariable-adjusted risk of metabolic syndrome according to work schedule and sex. Data are presented on a logarithmic scale and were analyzed using multivariable logistic regression with adjustment for age, educational level, weekly alcohol consumption, smoking status and daily total energy expenditure (Model 3).

177x109mm (300 x 300 DPI)

## SUPPLEMENTAL MATERIAL

### Impact of night and shift work on metabolic syndrome and its components in an active middle-aged population-based sample

Virginie Bayon,<sup>1,\*</sup> Mathieu Berger,<sup>1,\*</sup> Geoffroy Solelhac,<sup>1</sup> José Haba-Rubio,<sup>1</sup> Pedro Marques-Vidal,<sup>2</sup> Marie-Pierre Strippoli,<sup>3</sup> Martin Preisig,<sup>3</sup> Damien Leger,<sup>4,5</sup> Raphael Heinzer<sup>1</sup>

<sup>1</sup>Center for Investigation and Research in Sleep (CIRS), Lausanne University Hospital (CHUV) and University of Lausanne, Lausanne, Switzerland; <sup>2</sup>Department of Medicine, Internal Medicine, Lausanne University Hospital (CHUV) and University of Lausanne, Lausanne, Switzerland; <sup>3</sup>Department of Psychiatry, Lausanne University Hospital (CHUV) and University of Lausanne, Lausanne, Switzerland; <sup>4</sup>Université de Paris, VIFASOM (Equipe d'accueil 5330 Vigilance FATigue SOMmeil et Santé Publique), Paris, France ; <sup>5</sup>APHP, Hôtel Dieu, Centre du Sommeil et de la Vigilance, Paris, France.

#### Online Data Supplement:

- **1 Supplementary Figure**
- **1 Supplementary Table**



**Supplementary Figure 1. Study flowchart**

FU: Follow-up

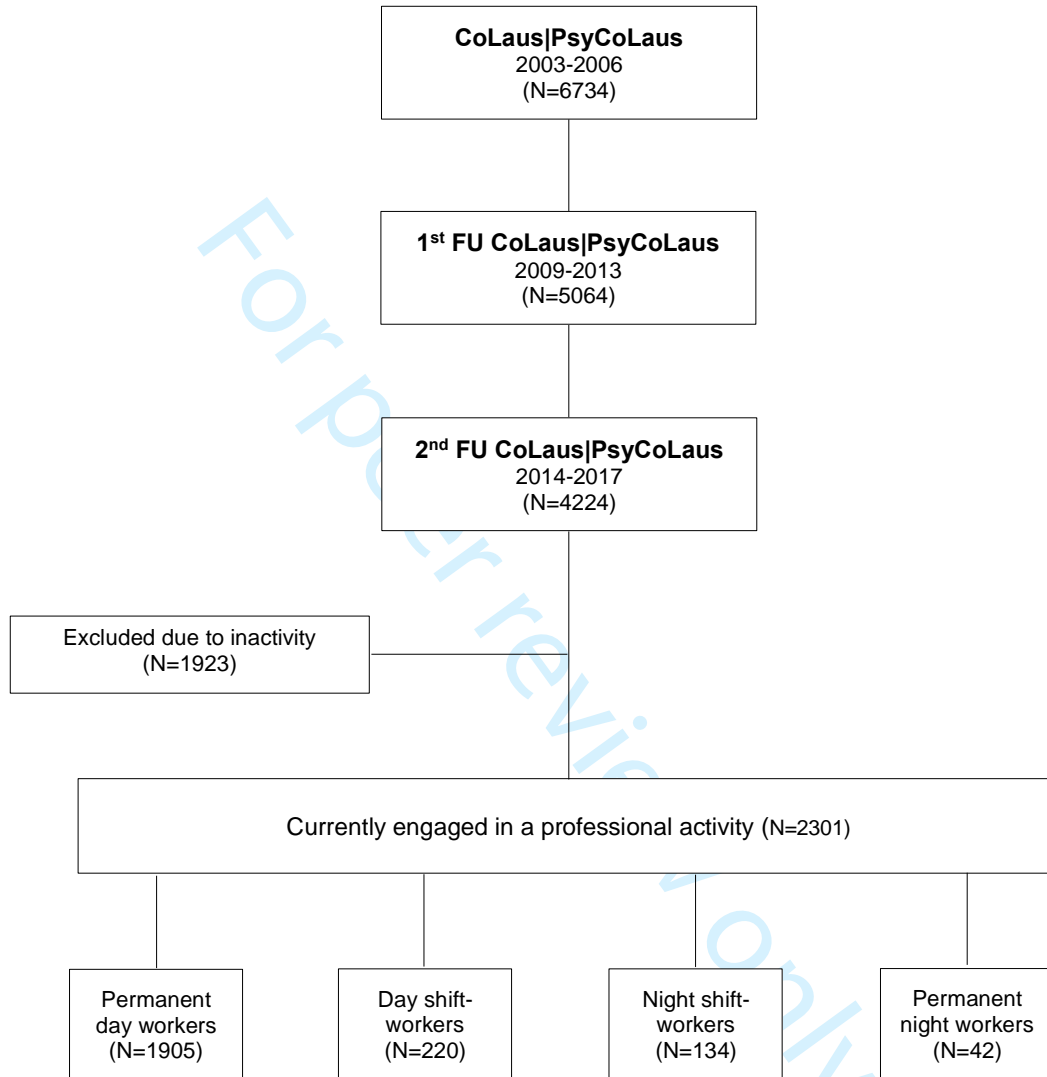

**Supplementary Table 1.** Association of metabolic syndrome with working schedule

|                         | Crude             |                  | Model 1           |              | Model 2           |              |
|-------------------------|-------------------|------------------|-------------------|--------------|-------------------|--------------|
|                         | N (%)             | p-value          | OR (95% CI)       | p-value      | OR (95% CI)       | p-value      |
| <b>Men</b>              | <i>n</i> = 1153   |                  | <i>n</i> = 1059   |              | <i>n</i> = 847    |              |
| Permanent day workers   | Ref               | -                | Ref               | -            | Ref               | -            |
| Day shift-workers       | 0.36 (0.18-0.74)  | <b>0.005</b>     | 0.33 (0.15-0.69)  | <b>0.004</b> | 0.38 (0.17-0.87)  | <b>0.022</b> |
| Night shift-workers     | 0.78 (0.45-1.34)  | 0.365            | 0.71 (0.40-1.26)  | 0.238        | 0.67 (0.33-1.36)  | 0.266        |
| Permanent night workers | 6.48 (2.40-17.46) | <b>&lt;0.001</b> | 6.00 (2.14-16.80) | <b>0.001</b> | 4.37 (1.33-14.38) | <b>0.015</b> |
| <b>Women</b>            | <i>n</i> = 1148   |                  | <i>n</i> = 1048   |              | <i>n</i> = 798    |              |
| Permanent day workers   | Ref               | -                | Ref               | -            | Ref               | -            |
| Day shift-workers       | 1.17 (0.66-2.05)  | 0.594            | 1.15 (0.62-2.12)  | 0.653        | 0.47 (0.17-1.24)  | 0.929        |
| Night shift-workers     | 1.76 (0.80-3.89)  | 0.159            | 1.96 (0.86-4.46)  | 0.107        | 1.38 (0.42-4.57)  | 0.596        |
| Permanent night workers | 2.20 (0.81-6.03)  | 0.124            | 1.84 (0.60-5.64)  | 0.289        | 1.43 (0.28-7.19)  | 0.668        |

p-values <0.05 are in bold.

Model 1 was adjusted for age (continuous), age square (continuous) and educational level (middle, low, high). Model 2 was additionally adjusted for weekly alcohol consumption (continuous), smoking status (never, former, current) and daily total energy expenditure.

## STROBE Statement—checklist of items that should be included in reports of observational studies

|                              | Item No | Recommendation                                                                                                                                                                                                                                                                                                                                                                                                                                                                                                                                                                                                                                                                                   | Page number              |
|------------------------------|---------|--------------------------------------------------------------------------------------------------------------------------------------------------------------------------------------------------------------------------------------------------------------------------------------------------------------------------------------------------------------------------------------------------------------------------------------------------------------------------------------------------------------------------------------------------------------------------------------------------------------------------------------------------------------------------------------------------|--------------------------|
| <b>Title and abstract</b>    | 1       | (a) Indicate the study's design with a commonly used term in the title or the abstract<br>(b) Provide in the abstract an informative and balanced summary of what was done and what was found                                                                                                                                                                                                                                                                                                                                                                                                                                                                                                    | 1, 4<br>4                |
| <b>Introduction</b>          |         |                                                                                                                                                                                                                                                                                                                                                                                                                                                                                                                                                                                                                                                                                                  |                          |
| Background/rationale         | 2       | Explain the scientific background and rationale for the investigation being reported                                                                                                                                                                                                                                                                                                                                                                                                                                                                                                                                                                                                             | 5, 6                     |
| Objectives                   | 3       | State specific objectives, including any prespecified hypotheses                                                                                                                                                                                                                                                                                                                                                                                                                                                                                                                                                                                                                                 | 6                        |
| <b>Methods</b>               |         |                                                                                                                                                                                                                                                                                                                                                                                                                                                                                                                                                                                                                                                                                                  |                          |
| Study design                 | 4       | Present key elements of study design early in the paper                                                                                                                                                                                                                                                                                                                                                                                                                                                                                                                                                                                                                                          | 6, 7                     |
| Setting                      | 5       | Describe the setting, locations, and relevant dates, including periods of recruitment, exposure, follow-up, and data collection                                                                                                                                                                                                                                                                                                                                                                                                                                                                                                                                                                  | 6, 7                     |
| Participants                 | 6       | (a) <i>Cohort study</i> —Give the eligibility criteria, and the sources and methods of selection of participants. Describe methods of follow-up<br><i>Case-control study</i> —Give the eligibility criteria, and the sources and methods of case ascertainment and control selection. Give the rationale for the choice of cases and controls<br><i>Cross-sectional study</i> —Give the eligibility criteria, and the sources and methods of selection of participants<br>(b) <i>Cohort study</i> —For matched studies, give matching criteria and number of exposed and unexposed<br><i>Case-control study</i> —For matched studies, give matching criteria and the number of controls per case | 6, 7<br>6, 7             |
| Variables                    | 7       | Clearly define all outcomes, exposures, predictors, potential confounders, and effect modifiers. Give diagnostic criteria, if applicable                                                                                                                                                                                                                                                                                                                                                                                                                                                                                                                                                         | 7, 8                     |
| Data sources/<br>measurement | 8*      | For each variable of interest, give sources of data and details of methods of assessment (measurement). Describe comparability of assessment methods if there is more than one group                                                                                                                                                                                                                                                                                                                                                                                                                                                                                                             | 7, 8                     |
| Bias                         | 9       | Describe any efforts to address potential sources of bias                                                                                                                                                                                                                                                                                                                                                                                                                                                                                                                                                                                                                                        | 9, 10                    |
| Study size                   | 10      | Explain how the study size was arrived at                                                                                                                                                                                                                                                                                                                                                                                                                                                                                                                                                                                                                                                        | 7                        |
| Quantitative variables       | 11      | Explain how quantitative variables were handled in the analyses. If applicable, describe which groupings were chosen and why                                                                                                                                                                                                                                                                                                                                                                                                                                                                                                                                                                     | 9, 10                    |
| Statistical methods          | 12      | (a) Describe all statistical methods, including those used to control for confounding<br>(b) Describe any methods used to examine subgroups and interactions<br>(c) Explain how missing data were addressed<br>(d) <i>Cohort study</i> —If applicable, explain how loss to follow-up was addressed<br><i>Case-control study</i> —If applicable, explain how matching of cases and controls was addressed<br><i>Cross-sectional study</i> —If applicable, describe analytical methods taking account of sampling strategy<br>(e) Describe any sensitivity analyses                                                                                                                                | 9, 10,<br>11<br>10<br>10 |

Continued on next page

1  
2  
3  
4  
5  
6  
7  
8  
9  
10  
11  
12  
13  
14  
15  
16  
17  
18  
19  
20  
21  
22  
23  
24  
25  
26  
27  
28  
29  
30  
31  
32  
33  
34  
35  
36  
37  
38  
39  
40  
41  
42  
43  
44  
45  
46  
47  
48  
49  
50  
51  
52  
53  
54  
55  
56  
57  
58  
59  
60**Results**

|                          |     |                                                                                                                                                                                                              |                            |
|--------------------------|-----|--------------------------------------------------------------------------------------------------------------------------------------------------------------------------------------------------------------|----------------------------|
| Participants             | 13* | (a) Report numbers of individuals at each stage of study—eg numbers potentially eligible, examined for eligibility, confirmed eligible, included in the study, completing follow-up, and analysed            | Fig. S1<br>10              |
|                          |     | (b) Give reasons for non-participation at each stage                                                                                                                                                         | Fig. S1                    |
|                          |     | (c) Consider use of a flow diagram                                                                                                                                                                           | Fig. S1                    |
| Descriptive data         | 14* | (a) Give characteristics of study participants (eg demographic, clinical, social) and information on exposures and potential confounders                                                                     | 11                         |
|                          |     | (b) Indicate number of participants with missing data for each variable of interest                                                                                                                          | Table 1                    |
|                          |     | (c) <i>Cohort study</i> —Summarise follow-up time (eg, average and total amount)                                                                                                                             |                            |
| Outcome data             | 15* | <i>Cohort study</i> —Report numbers of outcome events or summary measures over time                                                                                                                          |                            |
|                          |     | <i>Case-control study</i> —Report numbers in each exposure category, or summary measures of exposure                                                                                                         |                            |
|                          |     | <i>Cross-sectional study</i> —Report numbers of outcome events or summary measures                                                                                                                           | 11,<br>12                  |
| Main results             | 16  | (a) Give unadjusted estimates and, if applicable, confounder-adjusted estimates and their precision (eg, 95% confidence interval). Make clear which confounders were adjusted for and why they were included | 12,<br>Fig. 1,<br>Table S1 |
|                          |     | (b) Report category boundaries when continuous variables were categorized                                                                                                                                    |                            |
|                          |     | (c) If relevant, consider translating estimates of relative risk into absolute risk for a meaningful time period                                                                                             |                            |
| Other analyses           | 17  | Report other analyses done—eg analyses of subgroups and interactions, and sensitivity analyses                                                                                                               | 12,<br>13,<br>Table 3      |
| <b>Discussion</b>        |     |                                                                                                                                                                                                              |                            |
| Key results              | 18  | Summarise key results with reference to study objectives                                                                                                                                                     | 13                         |
| Limitations              | 19  | Discuss limitations of the study, taking into account sources of potential bias or imprecision. Discuss both direction and magnitude of any potential bias                                                   | 16                         |
| Interpretation           | 20  | Give a cautious overall interpretation of results considering objectives, limitations, multiplicity of analyses, results from similar studies, and other relevant evidence                                   | 16,<br>17                  |
| Generalisability         | 21  | Discuss the generalisability (external validity) of the study results                                                                                                                                        | 16,<br>17                  |
| <b>Other information</b> |     |                                                                                                                                                                                                              |                            |
| Funding                  | 22  | Give the source of funding and the role of the funders for the present study and, if applicable, for the original study on which the present article is based                                                | 18                         |

\*Give information separately for cases and controls in case-control studies and, if applicable, for exposed and unexposed groups in cohort and cross-sectional studies.

**Note:** An Explanation and Elaboration article discusses each checklist item and gives methodological background and published examples of transparent reporting. The STROBE checklist is best used in conjunction with this article (freely

1  
2 available on the Web sites of PLoS Medicine at <http://www.plosmedicine.org/>, Annals of Internal Medicine at  
3 <http://www.annals.org/>, and Epidemiology at <http://www.epidem.com/>). Information on the STROBE Initiative is  
4 available at [www.strobe-statement.org](http://www.strobe-statement.org).  
5  
6  
7  
8  
9  
10  
11  
12  
13  
14  
15  
16  
17  
18  
19  
20  
21  
22  
23  
24  
25  
26  
27  
28  
29  
30  
31  
32  
33  
34  
35  
36  
37  
38  
39  
40  
41  
42  
43  
44  
45  
46  
47  
48  
49  
50  
51  
52  
53  
54  
55  
56  
57  
58  
59  
60

For peer review only
