# Supplementary material for: Impact of night and shift work on metabolic syndrome and its components: a cross-sectional study in an active middle-to-older-aged population-based sample
Source: PubMed Central journal article supplement (PMC8852754; doi:10.1136/bmjopen-2021-053591), 2022-02-15
Supplement: bmjopen-2021-053591supp001.pdf [file bmjopen-2021-053591supp001.pdf]

## SUPPLEMENTAL MATERIAL

### **Impact of night and shift work on metabolic syndrome and its components in an active middle-aged population-based sample**

Virginie Bayon,<sup>1,\*</sup> Mathieu Berger,<sup>1,\*</sup> Geoffroy Solelhac,<sup>1</sup> José Haba-Rubio,<sup>1</sup> Pedro Marques-Vidal,<sup>2</sup> Marie-Pierre Strippoli,<sup>3</sup> Martin Preisig,<sup>3</sup> Damien Leger,<sup>4,5</sup> Raphael Heinzer<sup>1</sup>

<sup>1</sup>Center for Investigation and Research in Sleep (CIRS), Lausanne University Hospital (CHUV) and University of Lausanne, Lausanne, Switzerland; <sup>2</sup>Department of Medicine, Internal Medicine, Lausanne University Hospital (CHUV) and University of Lausanne, Lausanne, Switzerland; <sup>3</sup>Department of Psychiatry, Lausanne University Hospital (CHUV) and University of Lausanne, Lausanne, Switzerland; <sup>4</sup>Université de Paris, VIFASOM (Equipe d'accueil 5330 Vigilance FATigue SOMmeil et Santé Publique), Paris, France ; <sup>5</sup>APHP, Hôtel Dieu, Centre du Sommeil et de la Vigilance, Paris, France.

#### **Online Data Supplement:**

- **1 Supplementary Figure**
- **1 Supplementary Table**

**Supplementary Figure 1. Study flowchart**

FU: Follow-up

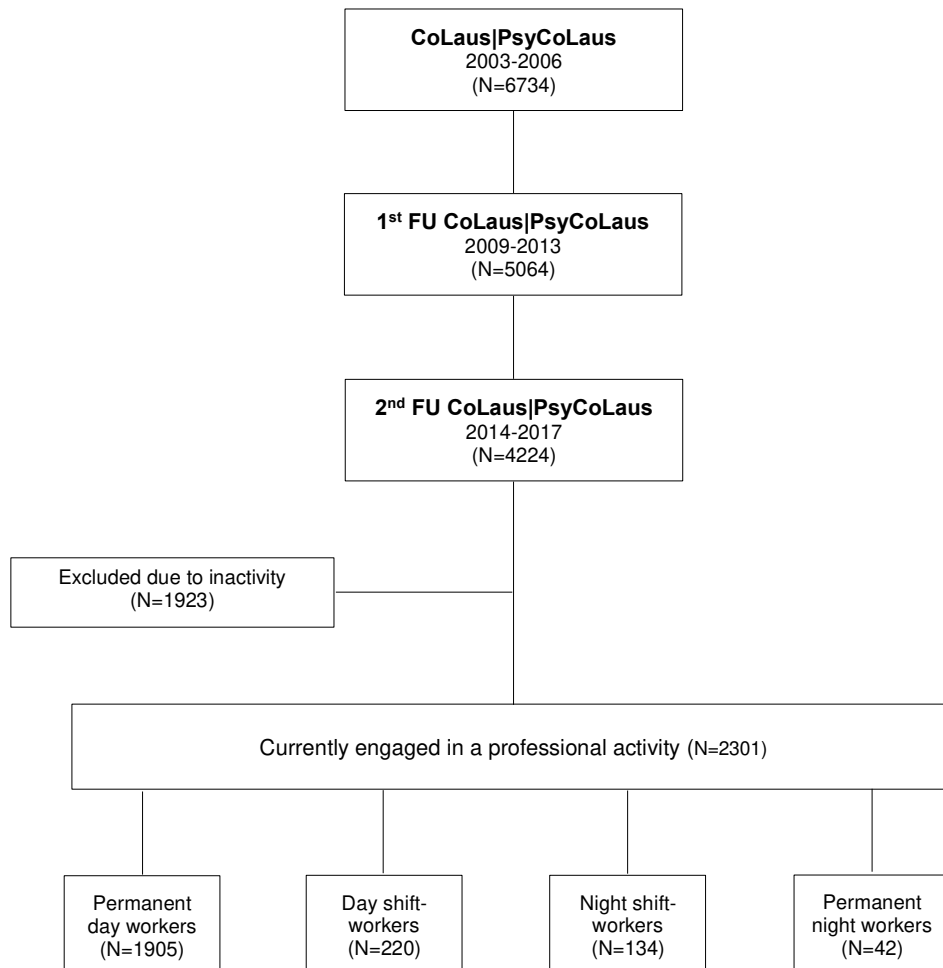

**Supplementary Table 1.** Association of metabolic syndrome with working schedule

|                         | Crude             |                  | Model 1           |              | Model 2           |              |
|-------------------------|-------------------|------------------|-------------------|--------------|-------------------|--------------|
|                         | N (%)             | p-value          | OR (95% CI)       | p-value      | OR (95% CI)       | p-value      |
| <b>Men</b>              | <i>n</i> = 1153   |                  | <i>n</i> = 1059   |              | <i>n</i> = 847    |              |
| Permanent day workers   | Ref               | -                | Ref               | -            | Ref               | -            |
| Day shift-workers       | 0.36 (0.18-0.74)  | <b>0.005</b>     | 0.33 (0.15-0.69)  | <b>0.004</b> | 0.38 (0.17-0.87)  | <b>0.022</b> |
| Night shift-workers     | 0.78 (0.45-1.34)  | 0.365            | 0.71 (0.40-1.26)  | 0.238        | 0.67 (0.33-1.36)  | 0.266        |
| Permanent night workers | 6.48 (2.40-17.46) | <b>&lt;0.001</b> | 6.00 (2.14-16.80) | <b>0.001</b> | 4.37 (1.33-14.38) | <b>0.015</b> |
| <b>Women</b>            | <i>n</i> = 1148   |                  | <i>n</i> = 1048   |              | <i>n</i> = 798    |              |
| Permanent day workers   | Ref               | -                | Ref               | -            | Ref               | -            |
| Day shift-workers       | 1.17 (0.66-2.05)  | 0.594            | 1.15 (0.62-2.12)  | 0.653        | 0.47 (0.17-1.24)  | 0.929        |
| Night shift-workers     | 1.76 (0.80-3.89)  | 0.159            | 1.96 (0.86-4.46)  | 0.107        | 1.38 (0.42-4.57)  | 0.596        |
| Permanent night workers | 2.20 (0.81-6.03)  | 0.124            | 1.84 (0.60-5.64)  | 0.289        | 1.43 (0.28-7.19)  | 0.668        |

p-values <0.05 are in bold.

Model 1 was adjusted for age (continuous), age square (continuous) and educational level (middle, low, high). Model 2 was additionally adjusted for weekly alcohol consumption (continuous), smoking status (never, former, current) and daily total energy expenditure.
